# Supplementary material for: Visible light induced hydrophosphinylation of unactivated alkenes catalyzed by salicylaldehyde
Source: Royal Society of Chemistry journal article supplement (doi:10.1039/d1gc00374g), 2021-01-01

## Visible Light Induced Hydrophosphinylation of Unactivated Alkenes Catalyzed by Salicylaldehyde

Zeqin Yuan, Simin Wang, Miaomiao Li, Tian Chen, Jiaye Fan, Fuying Xiong, Qianggen Li, Ping Hu, Bi-Qin Wang, Peng Cao and Yang Li\*

College of Chemistry and Materials Science, Sichuan Normal University

Chengdu 610068, China

e-mail: yangli@sicnu.edu.cn

### Supporting Information

#### Table of contents

|                                                                                                                            |    |
|----------------------------------------------------------------------------------------------------------------------------|----|
| 1. General methods.....                                                                                                    | 2  |
| 2. Synthesis of substrates.....                                                                                            | 3  |
| 3. Screening results .....                                                                                                 | 4  |
| 4. General procedure for the salicylaldehyde catalyzed hydrophosphinylation and spectroscopic data of novel compounds..... | 8  |
| 5. Computational studies .....                                                                                             | 17 |
| 6. Photo of the reaction set up and spectral distribution of the blue LED light .....                                      | 24 |
| 7. UV-visible light absorption spectra of aldehyde catalysts and 1a.....                                                   | 25 |
| 8. Fluorescence emission spectra and fluorescence quantum yield of salicylaldehyde .....                                   | 28 |
| 9. <sup>1</sup> H NMR, <sup>13</sup> C NMR and <sup>31</sup> P NMR spectra of novel compounds .....                        | 29 |

## 1. General methods

NMR spectra were acquired on a Bruker Ascend 600 spectrometer or a Varian 400 spectrometer, running at 600 MHz for  $^1\text{H}$ , 150 MHz for  $^{13}\text{C}$ , 162 or 243 MHz for  $^{31}\text{P}$  and 376 or 564 MHz for  $^{19}\text{F}$ . Chemical shifts ( $\delta$ ) are reported in ppm relative to internal standard signals (tetramethylsilane TMS, 0.00 ppm for  $^1\text{H}$  NMR; chloroform  $\text{CDCl}_3$ , 77.16 ppm for  $^{13}\text{C}$  NMR; phosphoric acid  $\text{H}_3\text{PO}_4$ , 0.00 ppm for  $^{31}\text{P}$  NMR). The following abbreviations are used to indicate the multiplicity in NMR spectra: s, singlet; d, doublet; t, triplet; q, quartet; p, pentet; m, multiplet; bs, broad signal.  $^{13}\text{C}$  NMR spectra were acquired in a broad band decoupled mode. For characterization of isomeric mixtures, \*denotes minor isomer, +denotes overlap of signals from both isomers. Electrospray ionization high-resolution mass spectra (ESI-HRMS) were recorded on a Bruker P-SIMS-Gly FT-ICR mass spectrometer. Analytical thin layer chromatography (TLC) was performed using silica gel ( $\text{SiO}_2$ ,  $8\pm 2\ \mu\text{m} \geq 80\%$ ) visualized by ultraviolet irradiation or  $\text{KMnO}_4$  dip. For flash chromatography (FC) silica gel ( $\text{SiO}_2$ , 200-300 mesh) was used. For high performance thin layer chromatography (HPTLC) silica gel ( $\text{SiO}_2$ , 10-40  $\mu\text{m}$ ) was used. Unless otherwise noted, commercially available reagents were used without further purification.

## 2. Synthesis of substrates

Numbering of starting materials

Secondary phosphine oxide (**1**):

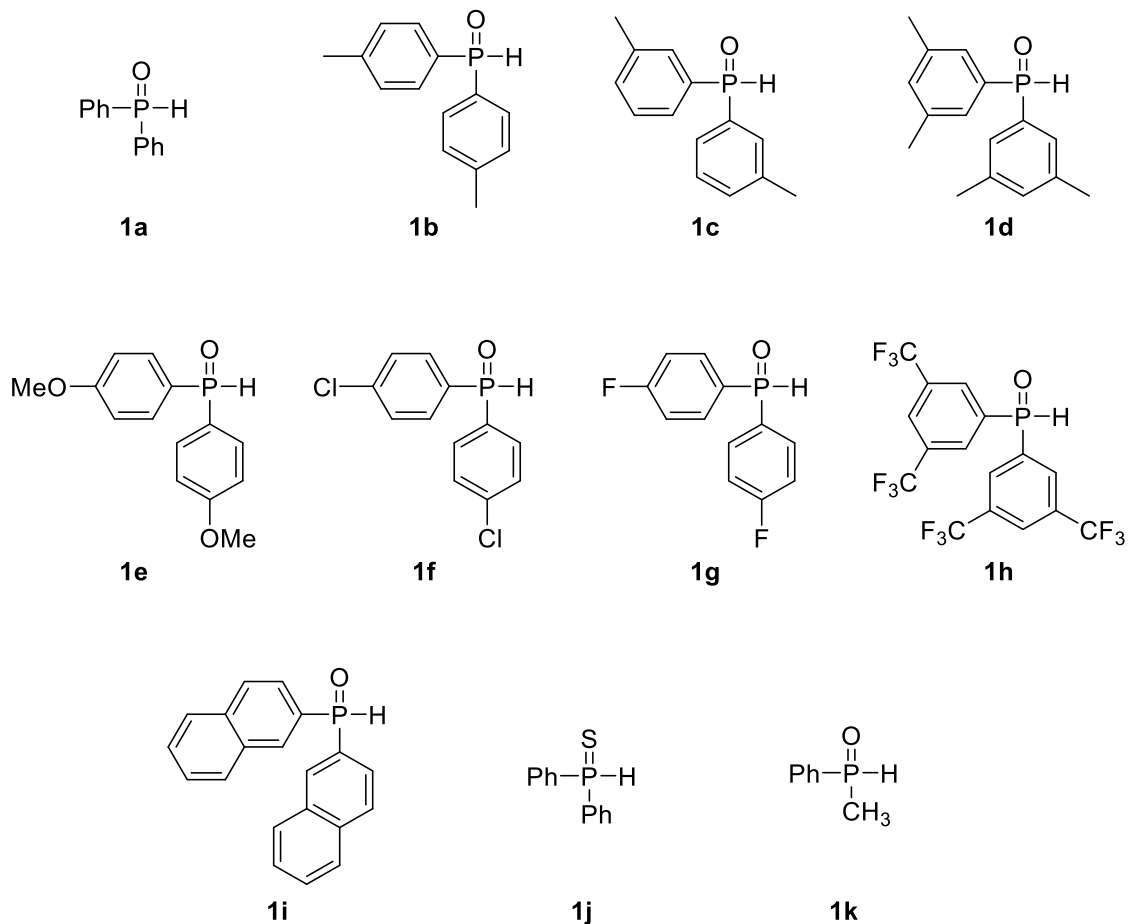

Secondary phosphine oxide **1a**, **1d** and **1i** are commercially available. Secondary phosphine oxide **1b-c** and **1e-h** were prepared according to the procedure reported.<sup>1</sup> Secondary phosphine oxide **1j** was prepared according to known procedure.<sup>2</sup> Secondary phosphine oxide **1k** was prepared according to known procedure.<sup>3</sup> All spectroscopic data are identical to those reported.

<sup>1</sup> W. Huang, J. Byun, I. Rörich, C. Ramanan, P. W. M. Blom, H. Lu, D. Wang, L. C. Silva, R. Li, L. Wang, K. Landfester, K. A. I. Zhang, *Angew. Chem., Int. Ed.*, 2018, **57**, 8316.

<sup>2</sup> G. Peters, *J. Am. Chem. Soc.* 1960, **82**, 4751.

<sup>3</sup> (a) Y. Bai, N. Liu, S. Wang, S. Wang, S. Ning, L. Shi, L. Cui, Z. Zhang, J. Xiang, *Org. Lett.*, 2019, **21**, 6835; (b) Q. Xu, C.-Q. Zhao, L.-B. Han, *J. Am. Chem. Soc.*, 2008, **130**, 12648.

### 3. Screening results

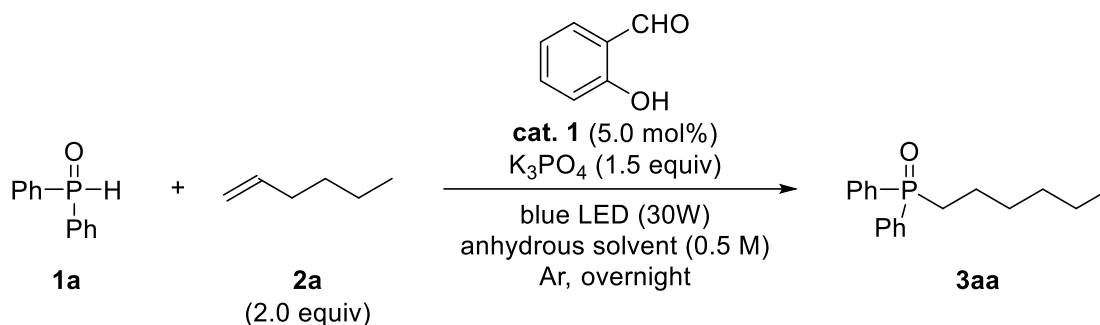

| Entry | Anhydrous solvent | NMR yield                                                     |
|-------|-------------------|---------------------------------------------------------------|
| 1     | DMF               | 42%                                                           |
| 2     | DMSO              | 40%                                                           |
| 3     | MeOH              | No <b>3aa</b> was obtained,<br>94% NMR yield of $Ph_2P(O)OMe$ |
| 4     | MeCN              | 32%                                                           |

All reactions were performed using **1a** (0.1 mmol), **2a** (0.2 mmol), 5.0 mol% **cat.1**, 1.5 equivalent  $K_3PO_4$  and 0.2 mL anhydrous solvent under 30W blue LED irradiation in argon atmosphere. Yields were determined by crude  $^1H$  NMR using 1,2-dichloroethane ( $ClCH_2CH_2Cl$ ) as internal standard.

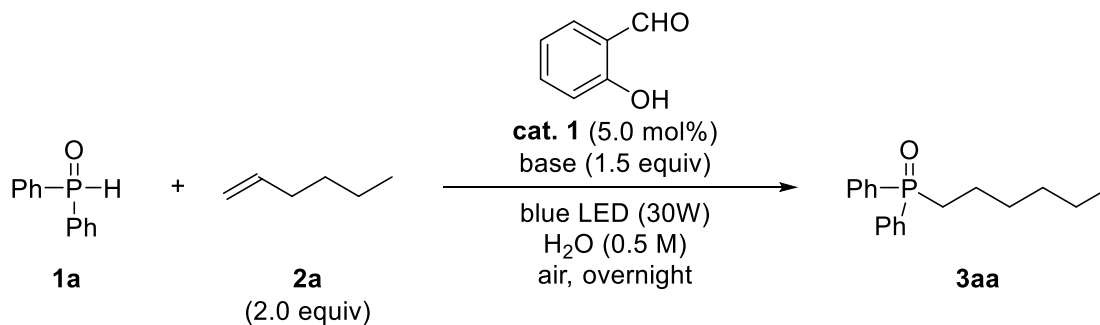

| Entry | base       | NMR yield |
|-------|------------|-----------|
| 1     | $K_3PO_4$  | 71%       |
| 2     | $KH_2PO_4$ | 17%       |
| 3     | $KHF_2$    | 48%       |
| 4     | KF         | 48%       |
| 5     | KCl        | 59%       |

|    |                                |      |
|----|--------------------------------|------|
| 6  | KBr                            | >59% |
| 7  | KI                             | 18%  |
| 8  | KOH                            | 60%  |
| 9  | KOMe                           | 56%  |
| 10 | KO <sup>t</sup> Bu             | 67%  |
| 11 | K <sub>2</sub> CO <sub>3</sub> | 79%  |

All reactions were performed using **1a** (0.1 mmol), **2a** (0.2 mmol), 5.0 mol% **cat.1**, 1.5 equivalent base and 0.2 mL distilled H<sub>2</sub>O under 30W blue LED irradiation in air atmosphere. Yields were determined by crude <sup>1</sup>H NMR using 1,2-dichloroethane (ClCH<sub>2</sub>CH<sub>2</sub>Cl) as internal standard.

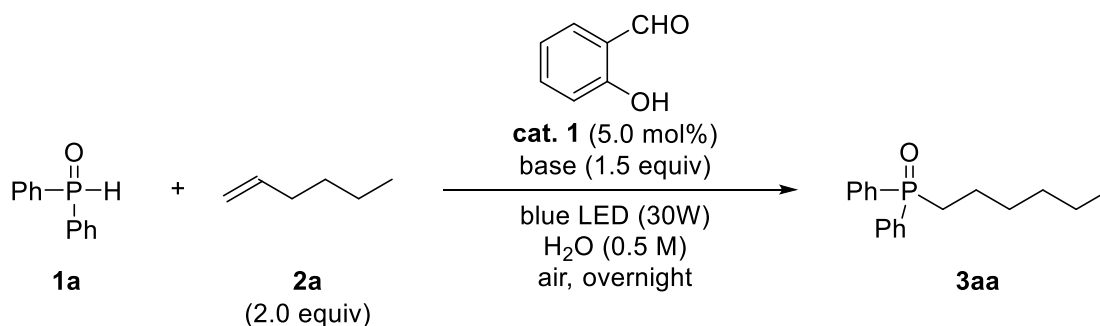

| Entry | base                            | NMR yield |
|-------|---------------------------------|-----------|
| 1     | Li <sub>2</sub> CO <sub>3</sub> | 64%       |
| 2     | Na <sub>2</sub> CO <sub>3</sub> | 79%       |
| 3     | Cs <sub>2</sub> CO <sub>3</sub> | 56%       |
| 4     | Ag <sub>2</sub> CO <sub>3</sub> | 17%       |
| 5     | NaHCO <sub>3</sub>              | 59%       |

All reactions were performed using **1a** (0.1 mmol), **2a** (0.2 mmol), 5.0 mol% **cat.1**, 1.5 equivalent base and 0.2 mL distilled H<sub>2</sub>O under 30W blue LED irradiation in air atmosphere. Yields were determined by crude <sup>1</sup>H NMR using 1,2-dichloroethane (ClCH<sub>2</sub>CH<sub>2</sub>Cl) as internal standard.

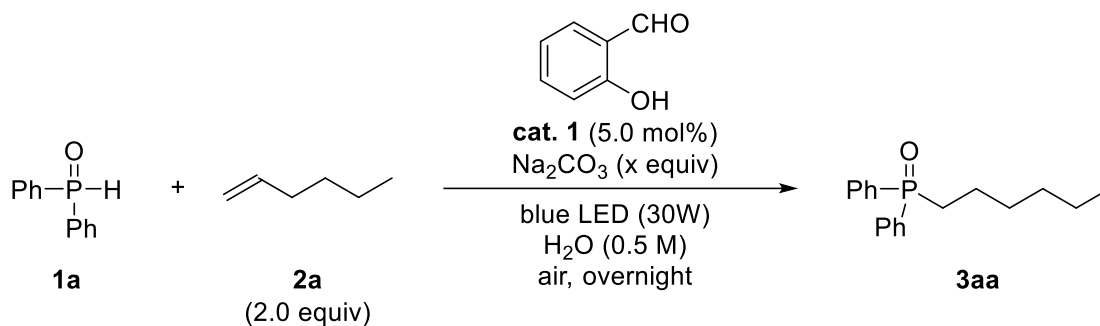

| Entry | Na <sub>2</sub> CO <sub>3</sub> | NMR yield |
|-------|---------------------------------|-----------|
| 1     | 0.5 equiv                       | 26%       |
| 2     | 1.0 equiv                       | 73%       |
| 3     | 2.0 equiv                       | 83%       |
| 4     | 3.0 equiv                       | 78%       |

All reactions were performed using **1a** (0.1 mmol), **2a** (0.2 mmol), 5.0 mol% **cat.1**, Na<sub>2</sub>CO<sub>3</sub> and 0.2 mL distilled H<sub>2</sub>O under 30W blue LED irradiation in air atmosphere. Yields were determined by crude <sup>1</sup>H NMR using 1,2-dichloroethane (ClCH<sub>2</sub>CH<sub>2</sub>Cl) as internal standard.

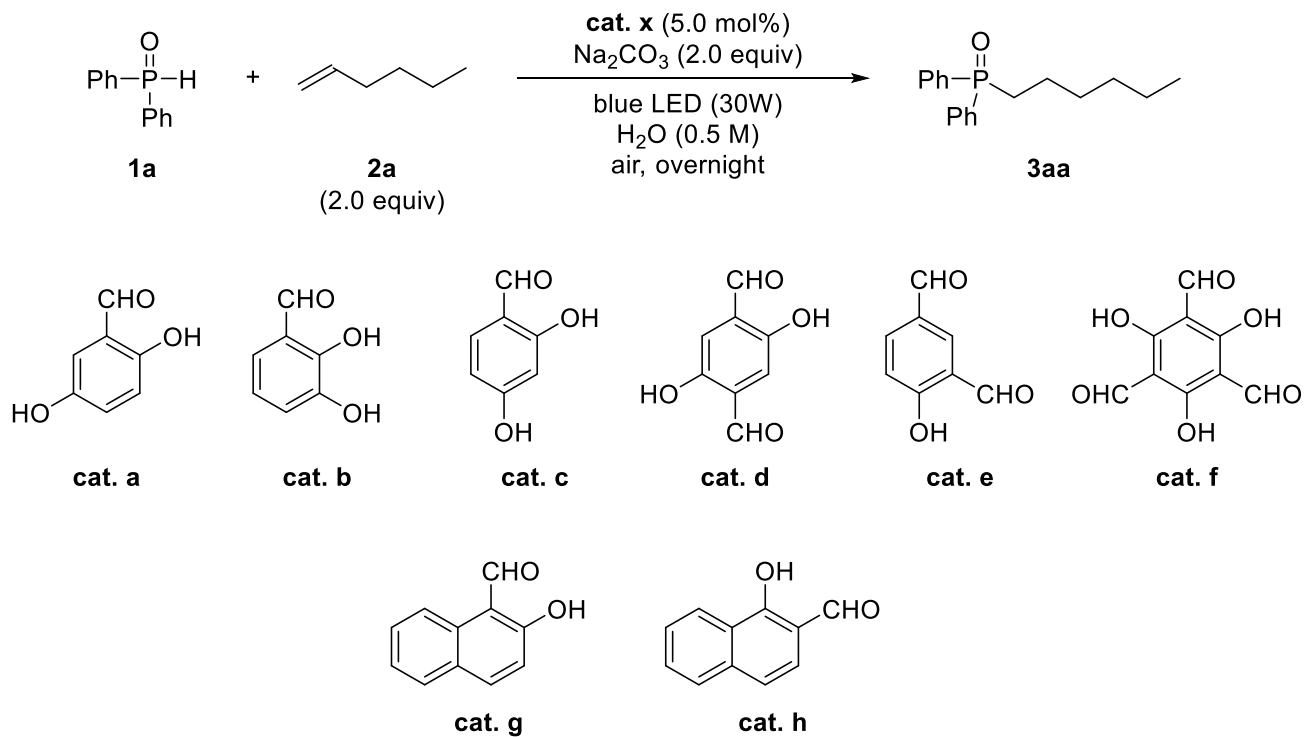

| Entry | catalyst      | NMR yield |
|-------|---------------|-----------|
| 1     | <b>Cat. a</b> | 31%       |
| 2     | <b>Cat. b</b> | <5%       |
| 3     | <b>Cat. c</b> | 56%       |
| 4     | <b>Cat. d</b> | 23%       |
| 5     | <b>Cat. e</b> | 68%       |
| 6     | <b>Cat. f</b> | 44%       |
| 7     | <b>Cat. g</b> | 80%       |
| 8     | <b>Cat. h</b> | 50%       |

All reactions were performed using **1a** (0.1 mmol), **2a** (0.2 mmol), 5.0 mol% catalyst, 2.0 equivalent Na<sub>2</sub>CO<sub>3</sub> and 0.2 mL distilled H<sub>2</sub>O under 30W blue LED irradiation in air atmosphere. Yields were determined by crude <sup>1</sup>H NMR using 1,2-dichloroethane (ClCH<sub>2</sub>CH<sub>2</sub>Cl) as internal standard.

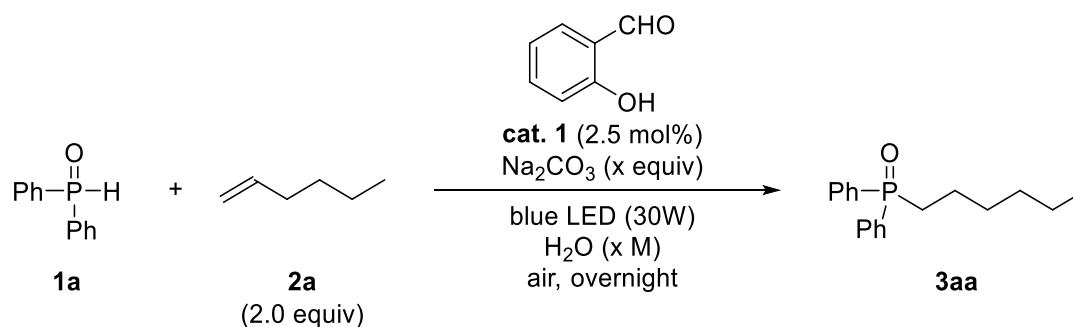

| Entry | Na <sub>2</sub> CO <sub>3</sub> | H <sub>2</sub> O | NMR yield |
|-------|---------------------------------|------------------|-----------|
| 1     | 2.0 equiv                       | 0.5M             | 89%       |
| 2     | 2.5 equiv                       | 0.5M             | 90%       |
| 3     | 2.5 equiv                       | 1.0M             | 95%       |
| 4     | 2.5 equiv                       | 0.33M            | 86%       |
| 5     | 2.5 equiv                       | 0.25M            | 88%       |

All reactions were performed using **1a** (0.1 mmol), **2a** (0.2 mmol), 2.5 mol% **cat.1**, Na<sub>2</sub>CO<sub>3</sub> and distilled H<sub>2</sub>O under 30W blue LED irradiation in air atmosphere. Yields were determined by crude <sup>1</sup>H NMR using 1,2-dichloroethane (ClCH<sub>2</sub>CH<sub>2</sub>Cl) as internal standard.

## 4. General procedure for the salicylaldehyde catalyzed hydrophosphinylation and spectroscopic data of novel compounds

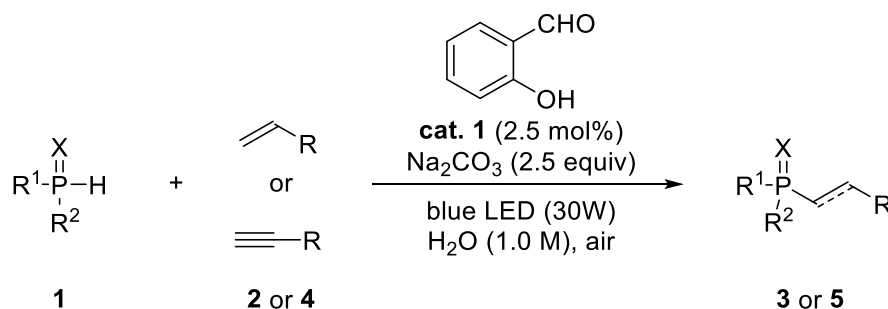

In a screw cap glass vial equipped with a magnetic stirring bar, secondary phosphine oxide **1** (0.2 mmol),  $\text{Na}_2\text{CO}_3$  (0.5 mmol), distilled water (0.2 mL), alkene **2** or alkyne **4** (0.4 mmol) and catalyst **1** (0.005 mmol) was added. The two phase solution was stirred under the irradiation of 30W blue LED for noted time. After full conversion of **1**, the reaction was extracted with ethyl acetate, dried over  $\text{Na}_2\text{SO}_4$ , and purified by FC or HPTLC.

Hexyldiphenylphosphine oxide (**3aa**):

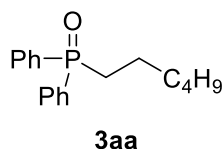

Following the procedure (3h), **3aa** was obtained after FC on silica gel (Petro ether/EtOAc 1:1-1:4) in 90% yield (51.2 mg) as colorless oil.  $^1\text{H NMR}$  (600 MHz,  $\text{CDCl}_3$ )  $\delta$  7.77 – 7.71 (m, 4H), 7.52 – 7.43 (m, 6H), 2.30 – 2.23 (m, 2H), 1.67 – 1.58 (m, 2H), 1.43 – 1.35 (m, 2H), 1.28 – 1.22 (m, 4H), 0.84 (t,  $J = 6.6$  Hz, 3H).  $^{13}\text{C NMR}$  (150 MHz,  $\text{CDCl}_3$ )  $\delta$  133.15 (d,  $J = 97.7$  Hz, 2C), 131.64 (d,  $J = 2.7$  Hz, 2C), 130.77 (d,  $J = 9.2$  Hz, 4C), 128.62

(d,  $J = 11.5$  Hz, 4C), 31.26, 30.65 (d,  $J = 14.6$  Hz), 29.74 (d,  $J = 72.1$  Hz), 22.40, 21.39 (d,  $J = 3.9$  Hz), 14.00.  $^{31}\text{P NMR}$  (243 MHz,  $\text{CDCl}_3$ )  $\delta$  33.18 (s). HRMS (ESI)  $m/z$ :  $[\text{M}+\text{H}]^+$  Calcd for  $\text{C}_{18}\text{H}_{24}\text{OP}^+$  287.1565; found: 287.1562.

Hexyldi-*p*-tolylphosphine oxide (**3ba**):

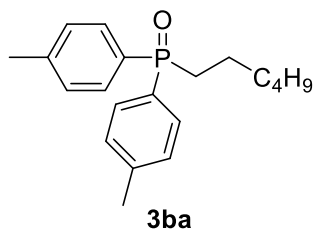

Following the procedure (3h), **3ba** was obtained after FC on silica gel (Petro ether/EtOAc 1:1-1:4-EtOAc) in 94% yield (58.5 mg) as colorless oil.  $^1\text{H NMR}$  (600 MHz,  $\text{CDCl}_3$ )  $\delta$  7.64 – 7.58 (m, 4H), 7.28 – 7.23 (m, 4H), 2.37 (s, 6H), 2.25 – 2.18 (m, 2H), 1.64 – 1.56 (m, 2H), 1.41 – 1.34 (m, 2H), 1.28 – 1.22 (m, 4H), 0.84 (t,  $J = 6.9$  Hz, 3H).  $^{13}\text{C NMR}$  (150 MHz,  $\text{CDCl}_3$ )  $\delta$  141.95 (d,  $J = 3.1$  Hz, 2C), 130.78 (d,  $J = 9.6$  Hz, 4C), 130.06 (d,  $J = 100.3$  Hz, 2C), 129.32 (d,  $J = 11.9$  Hz, 4C), 31.28, 30.68 (d,  $J = 14.3$  Hz), 29.91 (d,  $J = 72.8$  Hz), 22.41, 21.54 (2C), 21.45 (d,  $J = 4.1$  Hz),

14.00.  $^{31}\text{P NMR}$  (162 MHz,  $\text{CDCl}_3$ )  $\delta$  33.69 (s). HRMS (ESI)  $m/z$ :  $[\text{M}+\text{H}]^+$  Calcd for  $\text{C}_{20}\text{H}_{28}\text{OP}^+$  315.1878; found: 315.1880.



#### Hexyldi-*m*-tolylphosphine oxide (**3ca**):

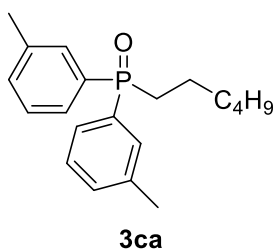

Following the procedure (overnight), **3ca** was obtained after FC on silica gel (Petro ether/EtOAc 1:2) in 77% yield (48.1 mg) as colorless oil.  $^1\text{H NMR}$  (600 MHz,  $\text{CDCl}_3$ )  $\delta$  7.60 (d,  $J = 11.8$  Hz, 2H), 7.50 – 7.44 (m, 2H), 7.37 – 7.28 (m, 4H), 2.38 (s, 6H), 2.28 – 2.20 (m, 2H), 1.66 – 1.57 (m, 2H), 1.45 – 1.34 (m, 2H), 1.30 – 1.21 (m, 4H), 0.84 (t,  $J = 6.2$  Hz, 3H).  $^{13}\text{C NMR}$  (150 MHz,  $\text{CDCl}_3$ )  $\delta$  138.53 (d,  $J = 11.0$  Hz), 133.16 (d,  $J = 97.1$  Hz), 132.42 (d,  $J = 2.9$  Hz), 131.40 (d,  $J = 8.7$  Hz), 128.48 (d,  $J = 12.0$  Hz), 127.68 (d,  $J = 9.0$  Hz), 31.29, 30.70 (d,  $J = 14.9$  Hz), 29.78 (d,  $J = 71.9$  Hz), 22.45, 21.47 (2C), 21.42 (d,  $J = 4.2$  Hz), 14.03.  $^{31}\text{P NMR}$  (243 MHz,  $\text{CDCl}_3$ )  $\delta$  33.37 (s). HRMS (ESI)  $m/z$ :  $[\text{M}+\text{H}]^+$  Calcd for  $\text{C}_{20}\text{H}_{28}\text{OP}^+$  315.1878; found: 315.1880.

#### Bis(3,5-dimethylphenyl)(hexyl)phosphine oxide (**3da**):

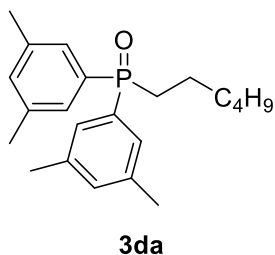

Following the procedure (3h), **3da** was obtained after FC on silica gel (Petro ether/EtOAc 1:1-1:4-EtOAc) in 77% yield (52.3 mg) as white solid.  $^1\text{H NMR}$  (600 MHz,  $\text{CDCl}_3$ )  $\delta$  7.34 (d,  $J = 11.6$  Hz, 4H), 7.11 (s, 2H), 2.34 (s, 12H), 2.27 – 2.16 (m, 2H), 1.66 – 1.52 (m, 2H), 1.44 – 1.36 (m, 2H), 1.30 – 1.22 (m, 4H), 0.85 (t,  $J = 7.0$  Hz, 3H).  $^{13}\text{C NMR}$  (150 MHz,  $\text{CDCl}_3$ )  $\delta$  138.23 (d,  $J = 12.0$  Hz, 4C), 133.52 – 132.76 (m, 4C), 128.30 (d,  $J = 8.8$  Hz, 4C), 31.26, 30.68 (d,  $J = 15.0$  Hz), 29.69 (d,  $J = 71.8$  Hz), 22.42, 21.44 – 21.26 (m, 5C), 14.01.  $^{31}\text{P NMR}$  (162 MHz,  $\text{CDCl}_3$ )  $\delta$  33.55 (s). HRMS (ESI)  $m/z$ :  $[\text{M}+\text{H}]^+$  Calcd for  $\text{C}_{22}\text{H}_{32}\text{OP}^+$  343.2191; found: 343.2164.

#### Hexylbis(4-methoxyphenyl)phosphine oxide (**3ea**):

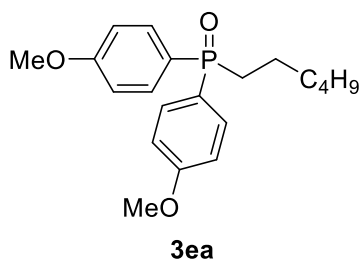

Following the procedure (overnight), **3ea** was obtained after FC on silica gel (Petro ether/EtOAc 1:2) in 86% yield (59.3 mg) as colorless oil.  $^1\text{H NMR}$  (600 MHz,  $\text{CDCl}_3$ )  $\delta$  7.69 – 7.54 (m, 4H), 6.97 (d,  $J = 8.1$  Hz, 4H), 3.83 (s, 6H), 2.27 – 2.11 (m, 2H), 1.62 – 1.53 (m, 2H), 1.41 – 1.33 (m, 2H), 1.28 – 1.21 (m, 4H), 0.84 (t,  $J = 6.7$  Hz, 3H).  $^{13}\text{C NMR}$  (150 MHz,  $\text{CDCl}_3$ )  $\delta$  162.25 (d,  $J = 2.7$  Hz, 2C), 132.70 (d,  $J = 10.6$  Hz, 4C), 124.82 (d,  $J = 104.1$  Hz, 2C), 114.23 (d,  $J = 12.4$  Hz, 4C), 55.43 (2C), 31.42, 30.82 (d,  $J = 14.7$  Hz), 30.35 (d,  $J = 72.9$  Hz), 22.54, 21.65 (d,  $J = 3.8$  Hz), 14.12.

$^{31}\text{P NMR}$  (162 MHz,  $\text{CDCl}_3$ )  $\delta$  33.40 (s). HRMS (ESI)  $m/z$ :  $[\text{M}+\text{H}]^+$  Calcd for  $\text{C}_{20}\text{H}_{28}\text{O}_3\text{P}^+$  347.1776; found: 347.1768.

#### Bis(4-chlorophenyl)(hexyl)phosphine oxide (**3fa**):

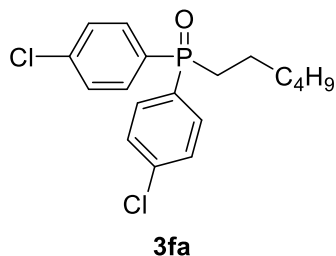

Following the procedure (overnight), **3fa** was obtained after FC on silica gel (Petro ether/EtOAc 1:1-1:4-EtOAc) in 71% yield (50.0 mg) as colorless oil.  $^1\text{H NMR}$  (600 MHz,  $\text{CDCl}_3$ )  $\delta$  7.60 – 7.55 (m, 4H), 7.40 – 7.36 (m, 4H), 2.19 – 2.11 (m, 2H), 1.56 – 1.45 (m, 2H), 1.38 – 1.27 (m, 2H), 1.23 – 1.13 (m, 4H), 0.77 (t,  $J = 6.8$  Hz, 3H).  $^{13}\text{C NMR}$  (150 MHz,  $\text{CDCl}_3$ )  $\delta$  138.57 (d,  $J = 3.2$  Hz, 2C), 132.19 (d,  $J = 10.0$  Hz, 4C), 131.38 (d,  $J = 99.0$  Hz, 2C), 129.21 (d,  $J = 12.0$  Hz, 4C), 31.30, 30.65 (d,  $J = 15.0$  Hz), 29.71 (d,  $J = 72.8$  Hz), 22.45, 21.37 (d,  $J = 4.1$  Hz), 14.05.  $^{31}\text{P NMR}$  (162 MHz,  $\text{CDCl}_3$ )  $\delta$  32.25 (s). HRMS (ESI)  $m/z$ :  $[\text{M}+\text{H}]^+$  Calcd for  $\text{C}_{18}\text{H}_{22}\text{Cl}_2\text{OP}^+$  355.0785, 357.0756, 359.0726; found: 359.0705, 357.0730, 355.0772.

#### Bis(4-fluorophenyl)(hexyl)phosphine oxide (**3ga**):

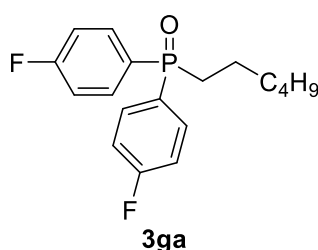

Following the procedure (overnight), **3ga** was obtained after FC on silica gel (Petro ether/EtOAc 1:1-1:4-EtOAc) in 80% yield (51.1 mg) as colorless oil.  $^1\text{H NMR}$  (600 MHz,  $\text{CDCl}_3$ )  $\delta$  7.64 (dd,  $J = 14.0, 8.9$  Hz, 4H), 7.09 (t,  $J = 8.3$  Hz, 4H), 2.16 (m, 2H), 1.56 – 1.46 (m, 2H), 1.40 – 1.27 (m, 2H), 1.21 – 1.13 (m, 4H), 0.77 (t,  $J = 6.5$  Hz, 3H).  $^{13}\text{C NMR}$  (150 MHz,  $\text{CDCl}_3$ )  $\delta$  165.02 (d,  $J = 253.1$  Hz, 2C), 133.27 (t,  $J = 9.5$  Hz, 4C), 129.06 (d,  $J = 100.8$  Hz, 2C), 116.19 (dd,  $J = 21.6, 11.9$  Hz, 4C), 31.30, 30.65 (d,  $J = 14.2$  Hz), 30.07 (d,  $J = 73.1$  Hz), 22.45, 21.42 (d,  $J = 2.5$  Hz), 14.03.  $^{31}\text{P NMR}$  (162 MHz,  $\text{CDCl}_3$ )  $\delta$  32.24 (s).  $^{19}\text{F NMR}$  (564 MHz,  $\text{CDCl}_3$ )  $\delta$  -106.82 – -107.08 (m). HRMS (ESI)  $m/z$ :  $[\text{M}+\text{H}]^+$  Calcd for  $\text{C}_{18}\text{H}_{22}\text{F}_2\text{OP}^+$  323.1376; found: 323.1368.

#### Bis(3,5-bis(trifluoromethyl)phenyl)(hexyl)phosphine oxide (**3ha**):

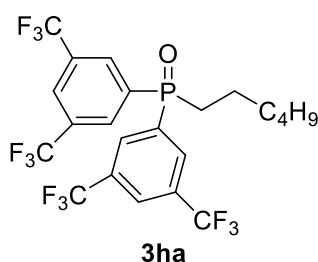

Following the procedure (overnight), **3ha** was obtained after HPTLC (Petro ether/EtOAc 1:1) in 59% yield (65.7 mg) as white solid.  $^1\text{H NMR}$  (600 MHz,  $\text{CDCl}_3$ )  $\delta$  8.23 (d,  $J = 11.0$  Hz, 4H), 8.08 (s, 2H), 2.44 (d,  $J = 5.4$  Hz, 2H), 1.70 – 1.60 (m, 2H), 1.50 – 1.42 (m, 2H), 1.32 – 1.24 (m, 4H), 0.86 (t,  $J = 6.9$  Hz, 3H).  $^{13}\text{C NMR}$  (150 MHz,  $\text{CDCl}_3$ )  $\delta$  135.63 (d,  $J = 95.2$  Hz, 2C), 132.94 (qd,  $J = 34.0, 11.4$  Hz, 4C), 130.81 (d,  $J = 6.4$  Hz, 4C), 126.39 (d,  $J = 3.0$  Hz, 2C), 122.79 (q,  $J = 273.3$  Hz, 2C), 31.18, 30.44 (d,  $J = 14.6$  Hz), 29.31 (d,  $J = 73.1$  Hz), 22.39, 21.16 (d,  $J = 4.2$  Hz), 13.94.  $^{31}\text{P NMR}$  (162 MHz,  $\text{CDCl}_3$ )  $\delta$  29.26 (s).  $^{19}\text{F NMR}$  (376 MHz,  $\text{CDCl}_3$ )  $\delta$  -63.10 (s). HRMS (ESI)  $m/z$ :  $[\text{M}+\text{H}]^+$  Calcd for  $\text{C}_{22}\text{H}_{20}\text{F}_{12}\text{OP}^+$  559.1060; found: 559.1050.

#### Hexyldi(naphthalen-2-yl)phosphine oxide (**3ia**):

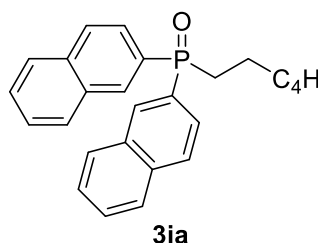

Following the procedure (overnight), **3ia** was obtained after FC on silica gel (Petro ether/EtOAc 1:1-1:4-EtOAc) in 85% yield (65.5 mg) as colorless oil.  $^1\text{H NMR}$  (600 MHz,  $\text{CDCl}_3$ )  $\delta$  8.43 (d,  $J = 13.1$  Hz, 2H), 7.91 (dd,  $J = 14.3, 5.4$  Hz, 4H), 7.85 (d,  $J = 8.0$  Hz, 2H), 7.71 (t,  $J = 8.9$  Hz, 2H), 7.61 – 7.51 (m, 4H), 2.44 (dt,  $J = 27.0, 13.5$  Hz, 2H), 1.73 – 1.64 (m, 2H), 1.49 – 1.38 (m, 2H), 1.31 – 1.20 (m, 4H), 0.83 (t,  $J = 6.9$  Hz, 3H).  $^{13}\text{C NMR}$  (150 MHz,  $\text{CDCl}_3$ )  $\delta$  134.69 (d,  $J = 1.8$  Hz, 2C), 132.85 (d,  $J = 8.3$  Hz, 2C), 132.70 (d,  $J = 12.7$  Hz, 2C), 130.37 (d,  $J = 98.0$  Hz, 2C), 128.96 (2C), 128.60 (d,  $J = 11.3$  Hz, 2C), 128.17 (2C), 127.91 (2C), 127.04 (2C), 125.79 (d,  $J = 10.6$  Hz, C), 31.36, 30.80 (d,  $J = 14.9$  Hz), 29.70 (d,  $J = 72.2$  Hz), 22.49, 21.58 (d,  $J = 3.5$  Hz), 14.07.  $^{31}\text{P NMR}$  (162 MHz,  $\text{CDCl}_3$ )  $\delta$  33.58 (s). HRMS (ESI)  $m/z$ :  $[\text{M}+\text{H}]^+$  Calcd for  $\text{C}_{26}\text{H}_{28}\text{OP}^+$  387.1878; found: 387.1851.

#### Hexyldiphenylphosphine sulfide (**3ja**):

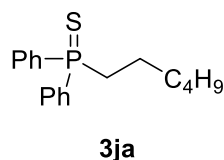

Following the procedure (overnight), **3ja** was obtained after FC on silica gel (Petro ether/EtOAc 1:2) in 50% yield (30 mg) as colorless oil.  $^1\text{H NMR}$  (600 MHz,  $\text{CDCl}_3$ )  $\delta$  7.85 – 7.78 (m, 4H), 7.51 – 7.41 (m, 6H), 2.48 – 2.38 (m, 2H), 1.67 – 1.55 (m, 2H), 1.42 – 1.34 (m, 2H), 1.29 – 1.22 (m, 4H), 0.84 (t,  $J = 6.7$  Hz, 3H).  $^{13}\text{C NMR}$  (150 MHz,  $\text{CDCl}_3$ )  $\delta$  133.12 (d,  $J = 79.6$  Hz, 2C), 131.48 (d,  $J = 2.8$  Hz, 2C), 131.18 (d,  $J = 10.1$  Hz, 4C), 128.71 (d,  $J = 12.0$  Hz, 4C), 32.69 (d,  $J = 56.5$  Hz), 31.39, 30.42 (d,  $J = 16.4$  Hz), 22.55, 22.22 (d,  $J = 2.9$  Hz), 14.10.  $^{31}\text{P NMR}$  (162 MHz,  $\text{CDCl}_3$ )  $\delta$  43.35 (s). HRMS (ESI)  $m/z$ :  $[\text{M}+\text{H}]^+$  Calcd for  $\text{C}_{18}\text{H}_{24}\text{PS}^+$  303.1336; found: 303.1316.

Hexyl(methyl)(phenyl)phosphine oxide (**3ka**):

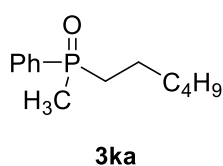

Following the procedure (overnight), **3ka** was obtained after HPTLC (EtOAc) in 67% yield (49.8 mg) as colorless liquid.  $^1\text{H NMR}$  (600 MHz,  $\text{CDCl}_3$ )  $\delta$  7.74 – 7.69 (m, 2H), 7.55 – 7.47 (m, 3H), 1.99 – 1.84 (m, 2H), 1.70 (d,  $J = 12.7$  Hz, 3H), 1.66 – 1.55 (m, 1H), 1.53 – 1.42 (m, 1H), 1.40 – 1.31 (m, 2H), 1.30 – 1.21 (m, 4H), 0.85 (t,  $J = 6.9$  Hz, 3H).  $^{13}\text{C NMR}$  (150 MHz,  $\text{CDCl}_3$ )  $\delta$  133.79 (d,  $J = 95.6$  Hz), 131.65 (d,  $J = 2.2$  Hz), 130.08 (d,  $J = 8.9$  Hz, 2C), 128.72 (d,  $J = 11.1$  Hz, 2C), 31.84 (d,  $J = 70.5$  Hz), 31.33, 30.64 (d,  $J = 14.9$  Hz), 22.46, 21.65 (d,  $J = 4.0$  Hz), 16.08 (d,  $J = 69.6$  Hz), 14.07.  $^{31}\text{P NMR}$  (162 MHz,  $\text{CDCl}_3$ )  $\delta$  38.37 (s). HRMS (ESI)  $m/z$ :  $[\text{M}+\text{H}]^+$  Calcd for  $\text{C}_{13}\text{H}_{22}\text{OP}^+$  225.1408; found: 225.1413.

Octyldiphenylphosphine oxide (**3ab**):

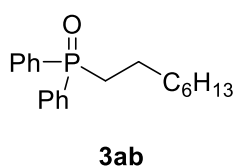

Following the procedure (overnight), **3ab** was obtained after HPTLC (Petro ether/EtOAc 1:1) in 83% yield (52.3 mg) as white solid.  $^1\text{H NMR}$  (600 MHz,  $\text{CDCl}_3$ )  $\delta$  7.72 – 7.58 (m, 4H), 7.46 – 7.32 (m, 6H), 2.20 – 2.14 (m, 2H), 1.58 – 1.49 (m, 2H), 1.34 – 1.26 (m, 2H), 1.20 – 1.10 (m, 8H), 0.77 (t,  $J = 7.1$  Hz, 3H).  $^{13}\text{C NMR}$  (150 MHz,  $\text{CDCl}_3$ )  $\delta$  133.21 (d,  $J = 97.9$  Hz, 2C), 131.67 (d,  $J = 2.2$  Hz, 2C), 130.80 (d,  $J = 8.9$  Hz, 4C), 128.65 (d,  $J = 11.8$  Hz, 4C), 31.78, 31.00 (d,  $J = 14.4$  Hz), 29.76 (d,  $J = 72.0$  Hz), 29.06, 29.04, 22.63, 21.43 (d,  $J = 3.5$  Hz), 14.11.  $^{31}\text{P NMR}$  (162 MHz,  $\text{CDCl}_3$ )  $\delta$  33.28 (s). HRMS (ESI)  $m/z$ :  $[\text{M}+\text{H}]^+$  Calcd for  $\text{C}_{20}\text{H}_{28}\text{OP}^+$  315.1878; found: 315.1880.

(3,3-Dimethylbutyl)diphenylphosphine oxide (**3ac**):

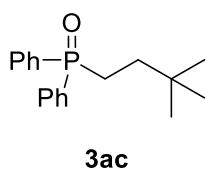

Following the procedure (overnight), **3ac** was obtained after HPTLC (Petro ether/EtOAc 1:2) in 77% yield (44.1 mg) as white solid.  $^1\text{H NMR}$  (600 MHz,  $\text{CDCl}_3$ )  $\delta$  7.68 – 7.64 (m, 4H), 7.46 – 7.36 (m, 6H), 2.17 – 2.10 (m, 2H), 1.46 – 1.39 (m, 2H), 0.81 (s, 9H).  $^{13}\text{C NMR}$  (150 MHz,  $\text{CDCl}_3$ )  $\delta$  133.14 (d,  $J = 97.9$  Hz, 2C), 131.73 (d,  $J = 2.8$  Hz, 2C), 130.84 (d,  $J = 8.9$  Hz, 4C), 128.72 (d,  $J = 11.8$  Hz, 4C), 34.81 (d,  $J = 3.7$  Hz), 30.60 (d,  $J = 14.0$  Hz), 28.89, 25.11 (d,  $J = 72.6$  Hz).  $^{31}\text{P NMR}$  (162 MHz,  $\text{CDCl}_3$ )  $\delta$  34.23 (s). HRMS (ESI)  $m/z$ :  $[\text{M}+\text{H}]^+$  Calcd for  $\text{C}_{18}\text{H}_{24}\text{OP}^+$  287.1565; found: 287.1562.

(2-Cyclohexylethyl)diphenylphosphine oxide (**3ad**):

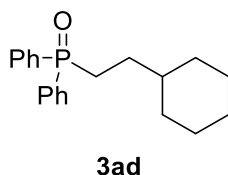

Following the procedure (overnight), **3ad** was obtained after HPTLC (Petro ether/EtOAc 1:1) in 80% yield (50.2 mg) as white solid.  $^1\text{H NMR}$  (600 MHz,  $\text{CDCl}_3$ )  $\delta$  7.76 – 7.70 (m, 4H), 7.53 – 7.42 (m, 6H), 2.30 – 2.21 (m, 2H), 1.74 – 1.64 (m, 4H), 1.64 – 1.59 (m, 1H), 1.55 – 1.47 (m, 2H), 1.31 – 1.05 (m, 4H), 0.91 – 0.83 (m, 2H).  $^{13}\text{C NMR}$  (150 MHz,  $\text{CDCl}_3$ )  $\delta$  133.21 (d,  $J = 98.0$  Hz, 2C), 131.66 (d,  $J = 2.4$  Hz, 2C), 130.80 (d,  $J = 9.7$  Hz, 4C), 128.65 (d,  $J = 11.9$  Hz, 4C), 38.68 (d,  $J = 14.1$  Hz), 32.79 (2C), 28.53 (d,  $J = 4.2$  Hz), 27.22 (d,  $J = 72.2$  Hz), 26.50, 26.20 (2C).  $^{31}\text{P NMR}$  (162 MHz,  $\text{CDCl}_3$ )  $\delta$  33.78 (s). HRMS (ESI)  $m/z$ :  $[\text{M}+\text{H}]^+$  Calcd for  $\text{C}_{20}\text{H}_{26}\text{OP}^+$  313.1721; found: 313.1720.

Diphenyl(3-phenylpropyl)phosphine oxide (**3ae**):

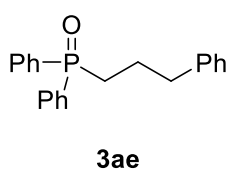

Following the procedure (overnight), **3ae** was obtained after HPTLC (Petro ether/EtOAc 1:2) in 70% yield (45.1 mg) as white solid.  $^1\text{H NMR}$  (600 MHz,  $\text{CDCl}_3$ )  $\delta$  7.62 – 7.56 (m, 4H), 7.44 – 7.33 (m, 6H), 7.20 – 7.16 (m, 2H), 7.13 – 7.08 (m, 1H), 7.05 – 7.00 (m, 2H), 2.64 (t,  $J = 7.4$  Hz, 2H), 2.21 – 2.13 (m, 2H), 1.92 – 1.84 (m, 2H).  $^{13}\text{C NMR}$  (150 MHz,  $\text{CDCl}_3$ )  $\delta$  140.92, 133.03 (d,  $J = 98.1$  Hz, 2C), 131.78 (d,  $J = 2.5$  Hz, 2C), 130.85 (d,  $J = 9.4$  Hz, 4C), 128.77 (2C), 128.65 (d,  $J = 11.8$  Hz, 4C), 128.52 (2C), 126.21, 36.74 (d,  $J = 15.1$  Hz), 29.02 (d,  $J =$

72.0 Hz), 23.10 (d, J = 3.5 Hz).  $^{31}\text{P}$  NMR (162 MHz,  $\text{CDCl}_3$ )  $\delta$  33.15 (s). HRMS (ESI) m/z:  $[\text{M}+\text{H}]^+$  Calcd for  $\text{C}_{21}\text{H}_{22}\text{OP}^+$  321.1408; found: 321.1395.

Diphenyl(3-(trimethylsilyl)propyl)phosphine oxide (**3af**):

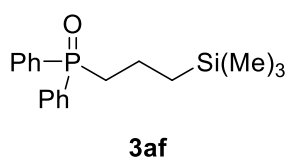

Following the procedure (overnight), **3af** was obtained after HPTLC (Petro ether/EtOAc 1:2) in 77% yield (48.7 mg) as white solid.  $^1\text{H}$  NMR (600 MHz,  $\text{CDCl}_3$ )  $\delta$  7.74 – 7.69 (m, 4H), 7.52 – 7.43 (m, 6H), 2.33 – 2.25 (m, 2H), 1.68 – 1.58 (m, 2H), 0.65 – 0.58 (m, 2H), -0.08 (s, 9H).  $^{13}\text{C}$  NMR (150 MHz,  $\text{CDCl}_3$ )  $\delta$  133.36 (d, J = 97.2 Hz, 2C), 131.72 (d, J = 2.3 Hz, 2C), 130.85 (d, J = 9.6 Hz, 4C), 128.72 (d, J = 11.1 Hz, 4C), 33.77 (d, J = 69.8 Hz), 18.94 (d, J = 12.9 Hz), 16.49 (d, J = 4.2 Hz), -1.64 (3C).  $^{31}\text{P}$  NMR (162 MHz,  $\text{CDCl}_3$ )  $\delta$  32.65 (s). HRMS (ESI) m/z:  $[\text{M}+\text{H}]^+$  Calcd for  $\text{C}_{18}\text{H}_{26}\text{OPSi}^+$  317.1491; found: 317.1487.

(4-Bromobutyl)diphenylphosphine oxide (**3ag**):

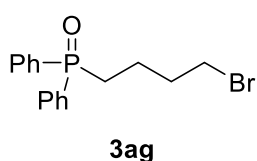

Following the procedure (12h, 2.0 equivalent extra alkene was added and reacted for additional 12h), **3ag** was obtained after HPTLC (Petro ether/EtOAc 1:2) in 50% yield (33.8 mg) as white solid.  $^1\text{H}$  NMR (600 MHz,  $\text{CDCl}_3$ )  $\delta$  7.72 – 7.63 (m, 4H), 7.56 – 7.37 (m, 6H), 3.30 (t, J = 6.7 Hz, 2H), 2.25 – 2.17 (m, 2H), 1.96 – 1.83 (m, 2H), 1.77 – 1.67 (m, 2H).  $^{13}\text{C}$  NMR (150 MHz,  $\text{CDCl}_3$ )  $\delta$  132.89 (d, J = 98.4 Hz, 2C), 131.95 (d, J = 2.2 Hz, 2C), 130.88 (d, J = 9.5 Hz, 4C), 128.85 (d, J = 11.4 Hz, 4C), 33.61 (d, J = 14.1 Hz), 32.72 (s), 28.92 (d, J = 71.9 Hz), 20.48 (d, J = 3.6 Hz).  $^{31}\text{P}$  NMR (162 MHz,  $\text{CDCl}_3$ )  $\delta$  32.74 (s). HRMS (ESI) m/z:  $[\text{M}+\text{H}]^+$  Calcd for  $\text{C}_{16}\text{H}_{19}\text{BrOP}^+$  337.0357, 339.0336; found: 337.0328, 339.0338.

(5-Hydroxypentyl)diphenylphosphine oxide (**3ah**):

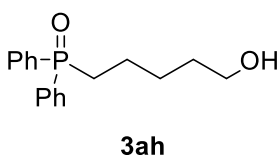

Following the procedure (overnight), **3ah** was obtained after HPTLC (MeOH/DCM 1:10) in 69% yield (39.5 mg) as colorless liquid.  $^1\text{H}$  NMR (600 MHz,  $\text{CDCl}_3$ )  $\delta$  7.68 – 7.61 (m, 4H), 7.46 – 7.36 (m, 6H), 3.51 (t, J = 6.2 Hz, 2H), 2.24 – 2.16 (m, 2H), 1.61 – 1.53 (m, 2H), 1.51 – 1.37 (m, 4H).  $^{13}\text{C}$  NMR (150 MHz,  $\text{CDCl}_3$ )  $\delta$  133.00 (d, J = 98.1 Hz, 2C), 131.85 (d, J = 2.7 Hz, 2C), 130.84 (d, J = 9.5 Hz, 4C), 128.78 (d, J = 11.8 Hz, 4C), 62.27 (s), 32.18 (s), 29.63 (d, J = 71.9 Hz), 27.12 (d, J = 13.9 Hz), 21.30 (d, J = 4.1 Hz).  $^{31}\text{P}$  NMR (162 MHz,  $\text{CDCl}_3$ )  $\delta$  33.71 (s). HRMS (ESI) m/z:  $[\text{M}+\text{H}]^+$  Calcd for  $\text{C}_{17}\text{H}_{22}\text{O}_2\text{P}^+$  289.1357; found: 289.1355.

(3-Phenoxypropyl)diphenylphosphine oxide (**3ai**):

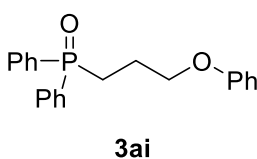

Following the procedure (overnight), **3ai** was obtained after HPTLC (Petro ether/EtOAc 1:2) in 74% yield (49.8 mg) as white solid.  $^1\text{H}$  NMR (600 MHz,  $\text{CDCl}_3$ )  $\delta$  7.72 – 7.64 (m, 4H), 7.47 – 7.34 (m, 6H), 7.23 – 7.09 (m, 2H), 6.88 – 6.82 (m, 1H), 6.81 – 6.73 (m, 2H), 3.92 (t, J = 5.9 Hz, 2H), 2.45 – 2.36 (m, 2H), 2.09 – 1.98 (m, 2H).  $^{13}\text{C}$  NMR (150 MHz,  $\text{CDCl}_3$ )  $\delta$  158.69, 132.91 (d, J = 98.9 Hz, 2C), 131.88 (d, J = 2.7 Hz, 2C), 130.86 (d, J = 9.0 Hz, 4C), 129.54 (2C), 128.79 (d, J = 11.9 Hz, 4C), 120.91, 114.54 (2C), 67.51 (d, J = 14.2 Hz), 26.50 (d, J = 72.9 Hz), 21.89 (d, J = 3.2 Hz).  $^{31}\text{P}$  NMR (162 MHz,  $\text{CDCl}_3$ )  $\delta$  33.17 (s). HRMS (ESI) m/z:  $[\text{M}+\text{H}]^+$  Calcd for  $\text{C}_{21}\text{H}_{22}\text{O}_2\text{P}^+$  337.1357; found: 337.1342.

(2-Ethoxyethyl)diphenylphosphine oxide (**3aj**):

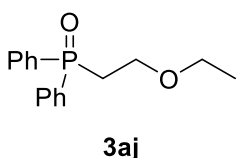

Following the procedure (overnight), **3aj** was obtained after HPTLC (Petro ether/EtOAc 1:2) in 45% yield (23.4 mg) as colorless liquid.  $^1\text{H}$  NMR (600 MHz,  $\text{CDCl}_3$ )  $\delta$  7.70 – 7.65 (m, 4H), 7.46 – 7.37 (m, 6H), 3.67 (dd, J = 16.4, 7.8 Hz, 2H), 3.32 (q, J = 7.0 Hz, 2H), 2.60 – 2.55 (m, 2H), 1.00 (t, J = 7.0 Hz, 3H).  $^{13}\text{C}$  NMR (150 MHz,  $\text{CDCl}_3$ )  $\delta$

133.05 (d, J = 99.7 Hz, 2C), 131.89 (d, J = 2.7 Hz, 2C), 130.82 (d, J = 9.7 Hz, 4C), 128.72 (d, J = 11.5 Hz, 4C), 66.37, 63.89, 30.99 (d, J = 70.8 Hz), 15.07. <sup>31</sup>P NMR (162 MHz, CDCl<sub>3</sub>) δ 30.46 (s). HRMS (ESI) m/z: [M+H]<sup>+</sup> Calcd for C<sub>16</sub>H<sub>20</sub>O<sub>2</sub>P<sup>+</sup> 275.1201; found: 275.1207.

#### Cyclohexyldiphenylphosphine oxide (**3ak**):

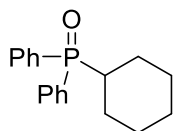

**3ak**

Following the procedure (overnight), **3ak** was obtained after HPTLC (Petro ether/EtOAc 1:1) in 85% yield (48.0 mg) as white solid. <sup>1</sup>H NMR (600 MHz, CDCl<sub>3</sub>) δ 7.73 – 7.68 (m, 4H), 7.45 – 7.36 (m, 6H), 2.21 – 2.12 (m, 1H), 1.77 – 1.70 (m, 2H), 1.69 – 1.59 (m, 3H), 1.52 – 1.40 (m, 2H), 1.24 – 1.14 (m, 3H). <sup>13</sup>C NMR (150 MHz, CDCl<sub>3</sub>) 132.18 (d, J = 94.7 Hz, 2C), 131.56 (d, J = 2.2 Hz, 2C), 131.20 (d, J = 8.6 Hz, 4C), 128.66 (d, J = 11.0 Hz, 4C), 37.31 (d, J = 73.1 Hz), 26.49 (d, J = 13.2 Hz, 2C), 25.89, 24.90 (d, J = 2.9 Hz, 2C). <sup>31</sup>P NMR (162 MHz, CDCl<sub>3</sub>) δ 35.11 (s).

HRMS (ESI) m/z: [M+H]<sup>+</sup> Calcd for C<sub>18</sub>H<sub>22</sub>OP<sup>+</sup> 285.1408; found: 285.1387.

#### Bicyclo[2.2.1]heptan-2-ylidiphenylphosphine oxide (**3al**):

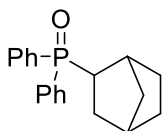

**3al**

Following the procedure (overnight), **3al** was obtained after FC on silica gel (Petro ether/EtOAc 4:1-1:1-EtOAc) in 90% yield (53.3 mg) and 1:1 dr as white solid. <sup>1</sup>H NMR (600 MHz, CDCl<sub>3</sub>) δ 7.83 – 7.71<sup>+</sup> (m, 4H, 4H\*), 7.51 – 7.40<sup>+</sup> (m, 6H, 6H\*), 2.51 – 2.47<sup>+</sup> (m, 1H, 1H\*), 2.36<sup>+</sup> (d, J = 4.1 Hz, 1H, 1H\*), 2.29<sup>+</sup> (td, J = 7.8, 7.1, 1.8 Hz, 1H, 1H\*), 1.98 – 1.88<sup>+</sup> (m, 1H, 1H\*), 1.85<sup>+</sup> (dt, J = 9.8, 2.0 Hz, 1H, 1H\*), 1.58<sup>+</sup> (ddt, J = 11.1, 7.6, 3.4 Hz, 2H, 2H\*), 1.42<sup>+</sup> (dddd, J = 12.2, 9.6, 7.6, 2.5 Hz, 1H, 1H\*), 1.35 – 1.22<sup>+</sup> (m, 2H, 2H\*), 1.17<sup>+</sup> (dt, J = 10.0, 1.7

Hz, 1H, 1H\*). <sup>13</sup>C NMR (150 MHz, CDCl<sub>3</sub>) δ 133.60<sup>+</sup> (dd, J = 95.6, 46.0 Hz, 2C, 2C\*), 131.41<sup>+</sup> (dd, J = 9.7, 2.2 Hz, 2C, 2C\*), 131.12 – 130.82<sup>+</sup> (m, 4C, 4C\*), 128.57<sup>+</sup> (dd, J = 15.6, 11.3 Hz, 4C, 4C\*), 40.00<sup>+</sup> (d, J = 73.0 Hz, 1C, 1C\*), 38.20<sup>+</sup> (1C, 1C\*), 37.35<sup>+</sup> (1C, 1C\*), 36.48<sup>+</sup> (d, J = 2.4 Hz, 1C, 1C\*), 32.17<sup>+</sup> (d, J = 14.7 Hz, 1C, 1C\*), 31.50<sup>+</sup> (d, J = 4.3 Hz, 1C, 1C\*), 28.73<sup>+</sup> (1C, 1C\*). <sup>31</sup>P NMR (162 MHz, CDCl<sub>3</sub>) δ 34.43<sup>+</sup> (s, 1P, 1P\*). HRMS (ESI) m/z: [M+H]<sup>+</sup> Calcd for C<sub>19</sub>H<sub>22</sub>OP<sup>+</sup> 297.1408; found: 297.1386.

#### Hexan-2-ylidiphenylphosphine oxide + hexan-3-ylidiphenylphosphine oxide (**3am**):

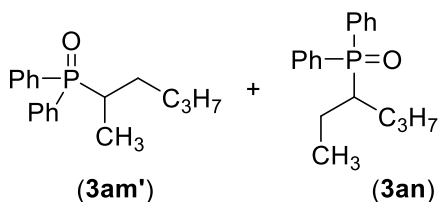

**(3am')**

**(3an)**

**3am** (mixture of **3am'** and **3an**)

Following the procedure (overnight), **3am** was obtained after FC on silica gel (Petro ether/EtOAc 1:1) as white solid. For substrate (*E*)-2-hexene, the yield is 75% (42.7 mg), **3am'**:**3an** = 1.1:1; for substrate (*Z*)-2-hexene, the yield is 62% (35.5 mg), **3am'**:**3an** = 1.5:1. <sup>1</sup>H NMR (600 MHz, CDCl<sub>3</sub>) δ 7.83 – 7.76<sup>+</sup> (m, 4H, 4H\*), 7.52 – 7.43<sup>+</sup> (m, 6H, 6H\*), 2.39 – 2.31 (m, 1H), 2.22 – 2.16\* (m, 1H\*), 1.81 – 1.70\* (m, 1H\*), 1.70 – 1.52<sup>+</sup> (m, 1H, 3H\*), 1.52 – 1.41 (m, 2H, 1H\*), 1.31 – 1.12

(m, 6H, 1H\*), 0.94\* (t, J = 7.4 Hz, 3H\*), 0.85 – 0.78<sup>+</sup> (m, 3H, 3H\*). <sup>13</sup>C NMR (150 MHz, CDCl<sub>3</sub>) δ 133.27\* (d, J = 93.5 Hz, 2C\*), 132.58 (dd, J = 94.3, 14.9 Hz, 2C), 131.53 (dd, J = 7.6, 2.7 Hz, 2C), 131.44\* (t, J = 2.4 Hz, 2C\*), 131.14 (dd, J = 8.6, 1.9 Hz, 4C), 131.03\* (dd, J = 8.5, 4.5 Hz, 4C\*), 128.72 – 128.55<sup>+</sup> (m, 4C, 4C\*), 38.46\* (d, J = 70.9 Hz), 32.04 (d, J = 72.3 Hz), 29.74 (d, J = 12.6 Hz), 29.17\* (d, J = 1.9 Hz), 28.54 (d, J = 2.0 Hz), 22.49, 21.31\*, 20.70\* (d, J = 1.9 Hz), 14.25\*, 13.98, 12.68\* (d, J = 9.5 Hz), 12.14 (d, J = 2.7 Hz). <sup>31</sup>P NMR (243 MHz, CDCl<sub>3</sub>) δ 37.48\* (s, 1P\*), 36.87 (s, 1P). For substrate (*E*)-2-hexene: HRMS (ESI) m/z: [M+H]<sup>+</sup> Calcd for C<sub>18</sub>H<sub>24</sub>OP<sup>+</sup> 287.1559; found: 287.1559. For substrate (*Z*)-2-hexene: HRMS (ESI) m/z: [M+H]<sup>+</sup> Calcd for C<sub>18</sub>H<sub>24</sub>OP<sup>+</sup> 287.1559; found: 287.1559.

Hexan-3-ylidiphenylphosphine oxide (**3an**):

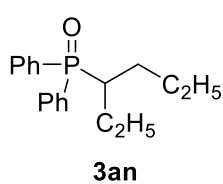

**3an**

Following the procedure (overnight), **3an** was obtained after FC on silica gel (Petro ether/EtOAc 1:1) as white solid. For substrate (*E*)-3-hexene, the yield is 50% (28.5 mg); for substrate (*Z*)-3-hexene, the yield is 72% (41.1 mg).  $^1\text{H NMR}$  (600 MHz,  $\text{CDCl}_3$ )  $\delta$  7.83 – 7.77 (m, 4H), 7.51 – 7.43 (m, 6H), 2.23 – 2.16 (m, 1H), 1.81 – 1.70 (m, 1H), 1.70 – 1.52 (m, 3H), 1.52 – 1.42 (m, 1H), 1.29 – 1.20 (m, 1H), 0.94 (t,  $J = 7.5$  Hz, 3H), 0.81 (t,  $J = 7.3$  Hz, 3H).  $^{13}\text{C NMR}$  (150 MHz,  $\text{CDCl}_3$ )  $\delta$  133.20 (d,  $J = 93.7$  Hz, 2C), 131.45 (t,  $J = 2.2$  Hz, 2C), 131.01 (dd,  $J = 8.6$ , 4.4 Hz, 4C), 128.62 (d,  $J = 11.0$  Hz, 4C), 38.43 (d,  $J = 70.9$  Hz), 29.15 (d,  $J = 1.7$  Hz), 21.27 (d,  $J = 9.8$  Hz), 20.68 (d,  $J = 1.9$  Hz), 14.24, 12.67 (d,  $J = 9.3$  Hz).  $^{31}\text{P NMR}$  (243 MHz,  $\text{CDCl}_3$ )  $\delta$  37.22 (s). For substrate (*E*)-3-hexene: **HRMS** (ESI)  $m/z$ :  $[\text{M}+\text{H}]^+$  Calcd for  $\text{C}_{18}\text{H}_{24}\text{OP}^+$  287.1559; found: 287.1558. For substrate (*Z*)-3-hexene: **HRMS** (ESI)  $m/z$ :  $[\text{M}+\text{H}]^+$  Calcd for  $\text{C}_{18}\text{H}_{24}\text{OP}^+$  287.1559; found: 287.1561.

((4-Methyltetrahydrofuran-3-yl)methyl)diphenylphosphine oxide (**3ao**):

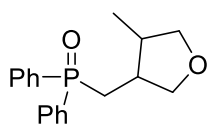

**3ao**

Following the procedure (4.0 equivalent of corresponding alkene was used; overnight), **3am** was obtained after HPTLC (DCM/MeOH 10:1) in 40% yield (24.1 mg) and 4.7:1 dr as white solid.  $^1\text{H NMR}$  (600 MHz,  $\text{CDCl}_3$ )  $\delta$  7.72 – 7.65<sup>+</sup> (m, 4H, 4H\*), 7.48 – 7.37<sup>+</sup> (m, 6H, 6H\*), 3.90 – 3.80\* (m, 2H\*), 3.76 (ddd,  $J = 25.2$ , 8.5, 6.7 Hz, 2H), 3.40 – 3.35 (m, 2H), 3.33 – 3.29\* (m, 1H\*), 3.17\* (t,  $J = 8.2$  Hz, 1H\*), 2.51<sup>+</sup> (ddtt,  $J = 15.0$ , 11.3, 7.7, 4.0 Hz, 1H, 1H\*), 2.35 (ddd,  $J = 15.8$ , 11.8, 4.4 Hz, 1H), 2.26 (hd,  $J = 6.9$ , 4.1 Hz, 1H), 2.14<sup>+</sup> (dtd,  $J = 15.1$ , 10.5, 5.1 Hz, 1H, 1H\*), 2.01 – 1.95\* (m, 1H\*), 1.91\* (p,  $J = 7.3$  Hz, 1H\*), 0.92\* (d,  $J = 6.6$  Hz, 3H\*), 0.89 (d,  $J = 7.1$  Hz, 3H).  $^{13}\text{C NMR}$  (150 MHz,  $\text{CDCl}_3$ )  $\delta$  133.62 – 132.59<sup>+</sup> (m, 2C, 2C\*), 132.05 – 131.90<sup>+</sup> (m, 2C, 2C\*), 130.94 – 130.71<sup>+</sup> (m, 4C, 4C\*), 128.94 – 128.73<sup>+</sup> (m, 4C, 4C\*), 74.64, 74.24\*, 73.80\* (d,  $J = 4.1$  Hz), 71.90 (d,  $J = 4.7$  Hz), 41.62\* (d,  $J = 12.5$  Hz), 41.03\* (d,  $J = 3.3$  Hz), 36.74 (d,  $J = 9.9$  Hz), 36.37 (d,  $J = 3.3$  Hz), 32.78\* (d,  $J = 71.0$  Hz), 28.14 (d,  $J = 72.8$  Hz), 15.82\*, 13.56.  $^{31}\text{P NMR}$  (162 MHz,  $\text{CDCl}_3$ )  $\delta$  31.83 (s), 31.01\* (s). **HRMS** (ESI)  $m/z$ :  $[\text{M}+\text{H}]^+$  Calcd for  $\text{C}_{18}\text{H}_{22}\text{O}_2\text{P}^+$  301.0357; found: 301.1367.

(*Z*)-hex-1-en-1-ylidiphenylphosphine oxide (**5aa**):

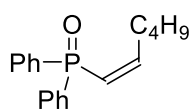

**5aa**

Following the procedure (overnight), **5aa** was obtained after HPTLC (Petro ether/EtOAc 1:1) in 47% yield (26.6 mg) as white solid.  $^1\text{H NMR}$  (600 MHz,  $\text{CDCl}_3$ )  $\delta$  7.70 – 7.63 (m, 4H), 7.44 – 7.33 (m, 6H), 6.61 (ddt,  $J = 40.5$ , 12.9, 7.7 Hz, 1H), 6.03 (dd,  $J = 25.6$ , 12.9 Hz, 1H), 2.49 – 2.41 (m, 2H), 1.29 – 1.20 (m, 2H), 1.20 – 1.10 (m, 2H), 0.72 (t,  $J = 7.3$  Hz, 3H).  $^{13}\text{C NMR}$  (150 MHz,  $\text{CDCl}_3$ )  $\delta$  155.23, 134.66 (d,  $J = 103.7$  Hz, 2C), 131.58 (d,  $J = 2.2$  Hz, 2C), 131.01 (d,  $J = 9.8$  Hz, 4C), 128.61 (d,  $J = 11.9$  Hz, 4C), 121.37 (d,  $J = 100.8$  Hz), 31.04 (d,  $J = 1.4$  Hz), 30.77 (d,  $J = 7.8$  Hz), 22.33, 13.90.  $^{31}\text{P NMR}$  (162 MHz,  $\text{CDCl}_3$ )  $\delta$  21.60 (s). **HRMS** (ESI)  $m/z$ :  $[\text{M}+\text{H}]^+$  Calcd for  $\text{C}_{18}\text{H}_{22}\text{OP}^+$  285.1408; found: 285.1387.

(*E*)-hex-1-en-1-ylidiphenylphosphine oxide (**5aa'**):

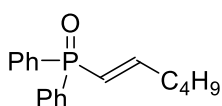

**5aa'**

Following the procedure (overnight), **5aa'** was obtained after HPTLC (Petro ether/EtOAc 1:1) in 16% yield (9.2 mg) as white solid.  $^1\text{H NMR}$  (600 MHz,  $\text{CDCl}_3$ )  $\delta$  7.65 – 7.59 (m, 4H), 7.47 – 7.42 (m, 2H), 7.41 – 7.36 (m, 4H), 6.66 (ddt,  $J = 19.5$ , 17.1, 6.5 Hz, 1H), 6.16 (dd,  $J = 24.6$ , 17.0 Hz, 1H), 2.26 – 2.20 (m, 2H), 1.42 – 1.36 (m, 2H), 1.31 – 1.24 (m, 2H), 0.83 (t,  $J = 7.3$  Hz, 2H).  $^{13}\text{C NMR}$  (150 MHz,  $\text{CDCl}_3$ )  $\delta$  153.13, 133.33 (d,  $J = 104.7$  Hz, 2C), 131.81 (d,  $J = 2.8$  Hz, 2C), 131.44 (d,  $J = 9.8$  Hz, 4C), 128.64 (d,  $J = 12.0$  Hz, 4C), 121.64 (d,  $J = 103.2$  Hz), 34.38 (d,  $J = 17.2$  Hz), 30.15, 22.39, 13.97.  $^{31}\text{P NMR}$  (162 MHz,  $\text{CDCl}_3$ )  $\delta$  24.13 (s). **HRMS** (ESI)  $m/z$ :  $[\text{M}+\text{H}]^+$  Calcd for  $\text{C}_{18}\text{H}_{22}\text{OP}^+$  285.1408; found: 285.1387.

(Z)-(5-chloropent-1-en-1-yl)diphenylphosphine oxide (**5ab**):

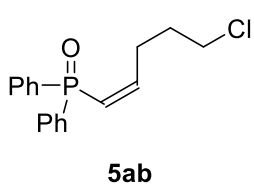

Following the procedure (48h), **5ab** was obtained after HPTLC (Petro ether/EtOAc 1:2) in 44% yield (27.1 mg) as white solid.  $^1\text{H NMR}$  (600 MHz,  $\text{CDCl}_3$ )  $\delta$  7.75 – 7.70 (m, 4H), 7.54 – 7.49 (m, 2H), 7.48 – 7.43 (m, 4H), 6.68 (ddt,  $J = 39.7, 12.8, 7.7$  Hz, 1H), 6.18 (ddd,  $J = 25.4, 12.8, 1.6$  Hz, 1H), 3.45 (t,  $J = 6.9$  Hz, 2H), 2.76 – 2.70 (m, 2H), 1.87 (p,  $J = 7.1$  Hz, 2H).  $^{13}\text{C NMR}$  (150 MHz,  $\text{CDCl}_3$ )  $\delta$  152.76, 134.32 (d,  $J = 104.3$  Hz,

2C), 131.79 (d,  $J = 2.8$  Hz, 2C), 130.98 (d,  $J = 9.9$  Hz, 4C), 128.73 (d,  $J = 12.0$  Hz, 4C), 122.89 (d,  $J = 99.6$  Hz), 44.23, 32.04, 28.40 (d,  $J = 7.8$  Hz).  $^{31}\text{P NMR}$  (162 MHz,  $\text{CDCl}_3$ )  $\delta$  21.81 (s). HRMS (ESI)  $m/z$ :  $[\text{M}+\text{H}]^+$  Calcd for  $\text{C}_{17}\text{H}_{19}\text{ClOP}^+$  305.0862, 307.0833; found: 305.0865, 307.0836.

(E)-(5-chloropent-1-en-1-yl)diphenylphosphine oxide (**5ab'**):

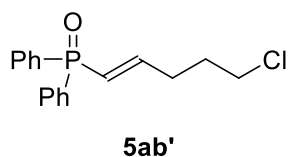

Following the procedure (48h), **5ab'** was obtained after HPTLC (Petro ether/EtOAc 1:2) in 19% yield (11.3 mg) as white solid.  $^1\text{H NMR}$  (600 MHz,  $\text{CDCl}_3$ )  $\delta$  7.72 – 7.66 (m, 4H), 7.56 – 7.51 (m, 2H), 7.49 – 7.44 (m, 4H), 6.73 (ddt,  $J = 19.2, 17.2, 6.6$  Hz, 1H), 6.32 (dd,  $J = 24.4, 17.0$  Hz, 1H), 3.55 (t,  $J = 6.4$  Hz, 2H), 2.51 – 2.46 (m, 2H), 1.97 (p,  $J = 6.7$  Hz, 2H).  $^{13}\text{C NMR}$  (150 MHz,  $\text{CDCl}_3$ )  $\delta$  150.57, 133.07

(d,  $J = 104.9$  Hz, 2C), 131.96 (d,  $J = 2.7$  Hz, 2C), 131.38 (d,  $J = 9.9$  Hz, 4C), 128.72 (d,  $J = 12.2$  Hz, 4C), 123.39 (d,  $J = 102.3$  Hz), 44.17, 31.64 (d,  $J = 16.8$  Hz), 30.72.  $^{31}\text{P NMR}$  (162 MHz,  $\text{CDCl}_3$ )  $\delta$  23.62 (s). HRMS (ESI)  $m/z$ :  $[\text{M}+\text{H}]^+$  Calcd for  $\text{C}_{17}\text{H}_{19}\text{ClOP}^+$  305.0862, 307.0833; found: 305.0865, 307.0836.

(Z)-(4-hydroxybut-1-en-1-yl)diphenylphosphine oxide (**5ac**):

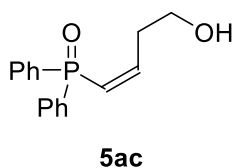

Following the procedure (48h), **5ac** was obtained after HPTLC (DCM/MeOH 20:1) in 66% yield and 5:1 dr (36.1 mg, mixture of Z- and E-configuration) as white solid.  $^1\text{H NMR}$  (600 MHz,  $\text{CDCl}_3$ )  $\delta$  7.75 – 7.70 (m, 4H), 7.56 – 7.50 (m, 2H), 7.49 – 7.44 (m, 4H), 6.85 (ddt,  $J = 39.9, 12.7, 8.5$  Hz, 1H), 6.31 (dd,  $J = 26.9, 12.8$  Hz, 1H), 4.19 (bs, 1H), 3.76 (t,  $J = 5.8$  Hz, 2H), 2.84 – 2.78 (m, 2H).  $^{13}\text{C NMR}$  (150 MHz,  $\text{CDCl}_3$ )  $\delta$  151.39 (s), 133.64

(d,  $J = 105.1$  Hz, 2C), 132.02 (d,  $J = 2.2$  Hz, 2C), 131.13 (d,  $J = 9.9$  Hz, 4C), 128.83 (d,  $J = 12.1$  Hz, 4C), 124.54 (d,  $J = 99.0$  Hz), 60.35 (d,  $J = 1.9$  Hz), 33.91 (d,  $J = 8.3$  Hz).  $^{31}\text{P NMR}$  (162 MHz,  $\text{CDCl}_3$ )  $\delta$  24.65 (s). HRMS (ESI)  $m/z$ :  $[\text{M}+\text{H}]^+$  Calcd for  $\text{C}_{17}\text{H}_{18}\text{O}_2\text{P}^+$  273.1044; found: 273.1054.

(E)-(3,3-dimethylbut-1-en-1-yl)diphenylphosphine oxide (**5ad**):

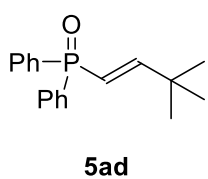

Following the procedure (48h), **5ad** was obtained after HPTLC (Petro ether/EtOAc 1:2) in 47% yield (26.7 mg) as white solid.  $^1\text{H NMR}$  (600 MHz,  $\text{CDCl}_3$ )  $\delta$  7.63 – 7.58 (m, 4H), 7.47 – 7.41 (m, 2H), 7.41 – 7.35 (m, 4H), 6.70 (dd,  $J = 20.4, 17.3$  Hz, 1H), 6.04 (dd,  $J = 24.4, 17.3$  Hz, 1H), 1.03 (s, 9H).  $^{13}\text{C NMR}$  (150 MHz,  $\text{CDCl}_3$ )  $\delta$  162.45, 133.44 (d,  $J = 104.6$  Hz, 2C), 131.75 (d,  $J = 2.8$  Hz, 2C), 131.39 (d,  $J = 9.8$  Hz, 4C), 128.60 (d,  $J = 12.0$  Hz, 4C), 116.50 (d,  $J = 103.5$  Hz), 35.37 (d,  $J = 15.2$  Hz), 28.73 (3C).  $^{31}\text{P NMR}$  (162 MHz,  $\text{CDCl}_3$ )  $\delta$  24.75 (s). HRMS (ESI)  $m/z$ :  $[\text{M}+\text{H}]^+$

Calcd for  $\text{C}_{18}\text{H}_{22}\text{OP}^+$  285.1408; found: 285.1387.

(Z)-(3,3-dimethylbut-1-en-1-yl)diphenylphosphine oxide (**5ad'**):

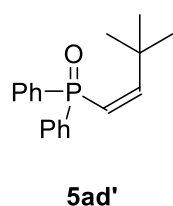

Following the procedure (48h), **5ad'** was obtained after HPTLC (Petro ether/EtOAc 1:2) in 24% yield (13.5 mg) as white solid.  $^1\text{H NMR}$  (600 MHz,  $\text{CDCl}_3$ )  $\delta$  7.71 – 7.63 (m, 4H), 7.43 – 7.33 (m, 6H), 6.61 (dd,  $J = 43.5, 14.6$  Hz, 1H), 5.89 (dd,  $J = 22.3, 14.6$  Hz, 1H), 1.13 (s, 9H).  $^{13}\text{C NMR}$  (150 MHz,  $\text{CDCl}_3$ )  $\delta$  164.70, 135.81 (d,  $J = 105.2$  Hz, 2C), 131.41 (d,  $J = 2.2$  Hz, 2C), 130.97 (d,  $J = 9.4$  Hz, 4C), 128.59 (d,  $J = 12.0$  Hz, 4C), 119.37 (d,  $J = 98.8$  Hz), 35.60 (d,  $J = 5.5$  Hz), 30.38 (3C).  $^{31}\text{P NMR}$  (162 MHz,  $\text{CDCl}_3$ )  $\delta$  20.18 (s). HRMS (ESI)  $m/z$ :  $[\text{M}+\text{H}]^+$  Calcd for

$C_{18}H_{22}OP^+$  285.1408; found: 285.1387.



## 5. Computational studies

All calculations were performed with the Gaussian 09 package.<sup>4</sup> All species were fully optimized without symmetry constraints with M062X<sup>5</sup> method in combination with 6-311+G(d,p) basis sets in solvent water ( $\epsilon = 78.355$ ) by using PCM model.<sup>6</sup> Harmonic vibration frequency calculations were carried out for all the stationary points to confirm each structure being either a minimum (no imaginary frequency) or a transition structure (one imaginary frequency). The reported relative energies are electronic energies in water ( $\Delta E$ , kcal/mol) at the M062X/6-311+G(d,p) level of theory without ZPVE corrections.

**S1.** Relative electronic energies in water at the M062X/6-311+G(d,p) level of theory.

| Species       | $E(\text{a.u.})$ | $\Delta E(\text{kcal/mol})$ |
|---------------|------------------|-----------------------------|
| <b>cat.1</b>  | -420.284183      | 0.0                         |
| <b>cat.1*</b> | -420.197010      | 54.7                        |
| <b>1a</b>     | -880.402182      | 0.0                         |
| <b>1a*</b>    | -880.266790      | 85.0                        |
| <b>1a'</b>    | -880.400352      | 0.0                         |
| <b>1a'*</b>   | -880.295853      | 65.6                        |
| <b>1a</b>     | -880.402182      | 0.0                         |
| <b>1a'</b>    | -880.400352      | 1.1                         |

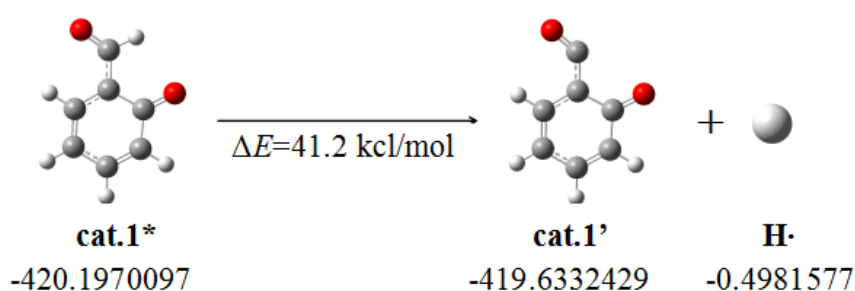

The acyl-H bond dissociating energy of **cat.1\*** was about 41.2 kcal/mol.

<sup>4</sup> M. J. Frisch, G. W. Trucks, H. B. Schlegel, G. E. Scuseria, M. A. Robb, J. R. Cheeseman, G. Scalmani, V. Barone, B. Mennucci, G. A. Petersson et al., *Gaussian 09*, Revision A0; Gaussian, Inc., Wallingford CT, 2009.

<sup>5</sup> Y. Zhao, D. G. Truhlar, *Theor. Chem. Acc.*, 2008, **120**, 215.

<sup>6</sup> J. Tomasi, M. Persico, *Chem. Rev.*, 1994, **94**, 2027.

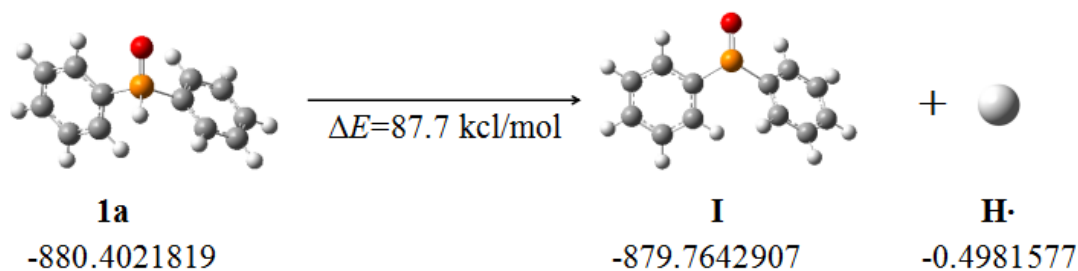

The P-H bond dissociating energy of **1a** was about 87.7 kcal/mol.

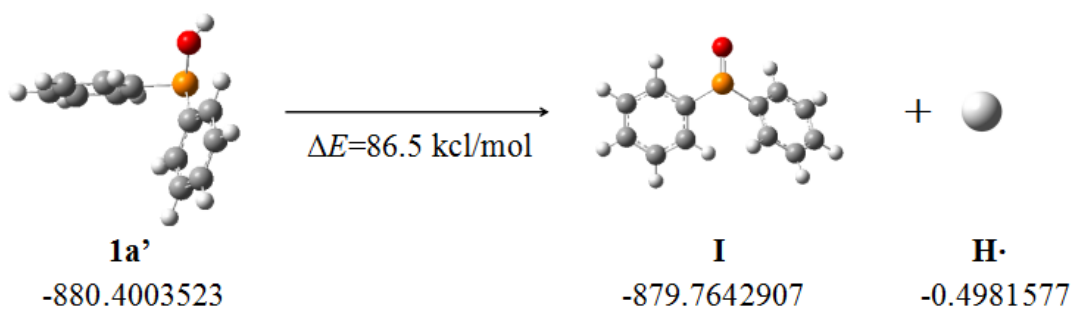

The O-H bond dissociating energy of **1a'** was about 86.5 kcal/mol.

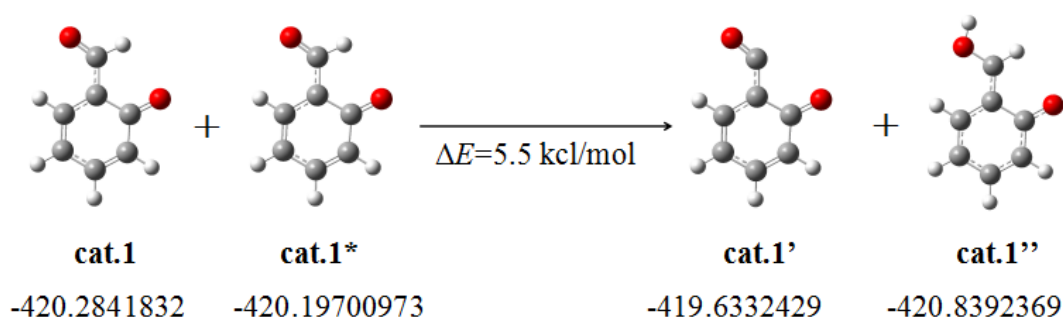

The **cat.1\*** interacts with a ground state molecule of **cat.1** furnishing two radicals: the benzoyl radical **cat.1'** and the hydroxybenzyl radical **cat.1''**. This radical-pair mechanism has been reported in 1970.<sup>7</sup>

## S2. Calculated Cartesian coordinates of the stationary points

### Cat.1

|   |   |           |           |           |
|---|---|-----------|-----------|-----------|
| 6 | 0 | 1.758623  | 0.756578  | 0.000027  |
| 6 | 0 | 0.349318  | 1.082372  | -0.000541 |
| 6 | 0 | -0.536435 | -0.061800 | -0.000218 |
| 6 | 0 | -0.031872 | -1.378260 | -0.000124 |
| 6 | 0 | 1.319059  | -1.638034 | -0.000070 |

<sup>7</sup> (a) M. Cocivera, A. M. Trozzolo, *J. Am. Chem. Soc.*, 1970, **6**, 1772-1774; (b) G. L. Closs, D. R. Paulson, *J. Am. Chem. Soc.*, 1970, **24**, 7229-7231.

|   |   |           |           |           |
|---|---|-----------|-----------|-----------|
| 6 | 0 | 2.211103  | -0.538643 | 0.000103  |
| 1 | 0 | 2.457460  | 1.587045  | 0.000293  |
| 1 | 0 | -0.751616 | -2.191448 | -0.000064 |
| 1 | 0 | 1.696377  | -2.652859 | 0.000018  |
| 1 | 0 | 3.281086  | -0.725383 | 0.000331  |
| 6 | 0 | -1.966592 | 0.156694  | -0.000038 |
| 1 | 0 | -2.273297 | 1.215263  | 0.000023  |
| 8 | 0 | -2.826662 | -0.720353 | 0.000288  |
| 8 | 0 | -0.051992 | 2.282095  | 0.000283  |

**Cat.1\***

|   |   |           |           |           |
|---|---|-----------|-----------|-----------|
| 6 | 0 | 1.786807  | 0.750676  | 0.000038  |
| 6 | 0 | 0.393035  | 1.053916  | 0.000022  |
| 6 | 0 | -0.585726 | -0.065722 | -0.000081 |
| 6 | 0 | -0.067474 | -1.373467 | -0.000049 |
| 6 | 0 | 1.319476  | -1.603913 | 0.000036  |
| 6 | 0 | 2.257291  | -0.566354 | 0.000061  |
| 1 | 0 | 2.467227  | 1.595560  | 0.000031  |
| 1 | 0 | -0.755445 | -2.209331 | -0.000090 |
| 1 | 0 | 1.673024  | -2.630661 | 0.000049  |
| 1 | 0 | 3.317815  | -0.780396 | 0.000091  |
| 6 | 0 | -1.985066 | 0.206912  | -0.000171 |
| 1 | 0 | -2.278567 | 1.263404  | 0.000130  |
| 8 | 0 | -2.872494 | -0.701579 | 0.000172  |
| 8 | 0 | -0.019269 | 2.245221  | -0.000092 |

**Cat.1'**

|   |   |           |           |           |
|---|---|-----------|-----------|-----------|
| 6 | 0 | 1.740617  | 0.730954  | -0.000005 |
| 6 | 0 | 0.337352  | 1.091154  | -0.000161 |
| 6 | 0 | -0.567202 | -0.037511 | -0.000053 |
| 6 | 0 | -0.092906 | -1.371796 | -0.000018 |
| 6 | 0 | 1.250805  | -1.655567 | -0.000020 |
| 6 | 0 | 2.164713  | -0.571865 | 0.000011  |
| 1 | 0 | 2.456420  | 1.546544  | 0.000072  |

|   |   |           |           |          |
|---|---|-----------|-----------|----------|
| 1 | 0 | -0.826501 | -2.172590 | 0.000017 |
| 1 | 0 | 1.608622  | -2.677419 | 0.000006 |
| 1 | 0 | 3.230575  | -0.780391 | 0.000061 |
| 6 | 0 | -1.989121 | 0.195443  | 0.000006 |
| 8 | 0 | -2.909388 | -0.570535 | 0.000073 |
| 8 | 0 | -0.032445 | 2.295409  | 0.000088 |

**Cat.1''**

|   |   |           |           |           |
|---|---|-----------|-----------|-----------|
| 6 | 0 | -1.837431 | 0.703583  | 0.000048  |
| 6 | 0 | -0.467769 | 1.083949  | -0.000024 |
| 6 | 0 | 0.502216  | -0.019779 | 0.000130  |
| 6 | 0 | 0.041823  | -1.365169 | 0.000067  |
| 6 | 0 | -1.311269 | -1.668914 | -0.000042 |
| 6 | 0 | -2.250685 | -0.627149 | -0.000030 |
| 1 | 0 | -2.570642 | 1.505034  | 0.000130  |
| 1 | 0 | 0.778912  | -2.161339 | 0.000142  |
| 1 | 0 | -1.639501 | -2.702363 | -0.000054 |
| 1 | 0 | -3.311566 | -0.857306 | -0.000006 |
| 6 | 0 | 1.855807  | 0.300453  | 0.000193  |
| 1 | 0 | 2.212613  | 1.320105  | -0.000138 |
| 8 | 0 | 2.790066  | -0.703351 | -0.000358 |
| 8 | 0 | -0.082120 | 2.300007  | -0.000095 |
| 1 | 0 | 3.670468  | -0.319225 | 0.001505  |

**1a**

|    |   |           |           |           |
|----|---|-----------|-----------|-----------|
| 15 | 0 | 0.017417  | 1.386404  | -0.423544 |
| 1  | 0 | -0.092062 | 1.622820  | -1.808069 |
| 8  | 0 | 0.148720  | 2.630212  | 0.409767  |
| 6  | 0 | -1.441337 | 0.367948  | -0.095558 |
| 6  | 0 | -2.405195 | 0.162300  | -1.082520 |
| 6  | 0 | -1.595630 | -0.212437 | 1.167372  |
| 6  | 0 | -3.521093 | -0.625165 | -0.808635 |
| 1  | 0 | -2.287908 | 0.610022  | -2.063878 |
| 6  | 0 | -2.711516 | -0.993199 | 1.437889  |

|   |   |           |           |           |
|---|---|-----------|-----------|-----------|
| 1 | 0 | -0.841594 | -0.059387 | 1.933389  |
| 6 | 0 | -3.672749 | -1.200256 | 0.448611  |
| 1 | 0 | -4.268628 | -0.787001 | -1.575832 |
| 1 | 0 | -2.832326 | -1.444268 | 2.415488  |
| 1 | 0 | -4.540908 | -1.812750 | 0.661778  |
| 6 | 0 | 1.433153  | 0.270932  | -0.236993 |
| 6 | 0 | 1.435226  | -0.988004 | -0.842068 |
| 6 | 0 | 2.521960  | 0.686196  | 0.527508  |
| 6 | 0 | 2.531179  | -1.827099 | -0.684744 |
| 1 | 0 | 0.581887  | -1.314430 | -1.429069 |
| 6 | 0 | 3.615815  | -0.161023 | 0.688043  |
| 1 | 0 | 2.503850  | 1.664586  | 0.994563  |
| 6 | 0 | 3.619791  | -1.413136 | 0.082120  |
| 1 | 0 | 2.536145  | -2.803859 | -1.153110 |
| 1 | 0 | 4.461994  | 0.156119  | 1.285785  |
| 1 | 0 | 4.470899  | -2.071963 | 0.207829  |

**1a\***

|    |   |           |           |           |
|----|---|-----------|-----------|-----------|
| 15 | 0 | 0.769894  | 1.517434  | -0.499166 |
| 1  | 0 | 0.856325  | 1.713109  | -1.891474 |
| 8  | 0 | 1.016462  | 2.732071  | 0.350045  |
| 6  | 0 | -0.849732 | 0.751918  | -0.268747 |
| 6  | 0 | -1.463595 | 0.052695  | -1.310400 |
| 6  | 0 | -1.425587 | 0.769821  | 1.003460  |
| 6  | 0 | -2.647932 | -0.637062 | -1.073882 |
| 1  | 0 | -1.020610 | 0.043306  | -2.301056 |
| 6  | 0 | -2.609516 | 0.078304  | 1.234411  |
| 1  | 0 | -0.945003 | 1.319201  | 1.805981  |
| 6  | 0 | -3.215777 | -0.628709 | 0.198170  |
| 1  | 0 | -3.128423 | -1.178076 | -1.880311 |
| 1  | 0 | -3.058429 | 0.089713  | 2.220359  |
| 1  | 0 | -4.137954 | -1.167799 | 0.380726  |
| 6  | 0 | 1.968163  | 0.178813  | -0.192021 |
| 6  | 0 | 1.983698  | -0.905283 | -1.197775 |

|   |   |          |           |           |
|---|---|----------|-----------|-----------|
| 6 | 0 | 2.032036 | -0.238292 | 1.227056  |
| 6 | 0 | 1.322084 | -2.038888 | -0.854482 |
| 1 | 0 | 2.422237 | -0.757317 | -2.177879 |
| 6 | 0 | 1.364050 | -1.379396 | 1.537983  |
| 1 | 0 | 2.507113 | 0.386067  | 1.973945  |
| 6 | 0 | 0.880509 | -2.236000 | 0.497030  |
| 1 | 0 | 1.189193 | -2.839490 | -1.574011 |
| 1 | 0 | 1.261027 | -1.695096 | 2.570495  |
| 1 | 0 | 0.344004 | -3.139212 | 0.755531  |

**1a'**

|    |   |           |           |           |
|----|---|-----------|-----------|-----------|
| 15 | 0 | -0.001442 | 1.446058  | -0.669429 |
| 8  | 0 | 0.147351  | 2.421285  | 0.681688  |
| 1  | 0 | 0.025910  | 3.347588  | 0.451132  |
| 6  | 0 | -1.403264 | 0.370007  | -0.165128 |
| 6  | 0 | -2.460738 | 0.192594  | -1.057357 |
| 6  | 0 | -1.440150 | -0.266394 | 1.080316  |
| 6  | 0 | -3.543182 | -0.618222 | -0.715606 |
| 1  | 0 | -2.439617 | 0.687917  | -2.022865 |
| 6  | 0 | -2.524286 | -1.062293 | 1.427377  |
| 1  | 0 | -0.616096 | -0.137969 | 1.775295  |
| 6  | 0 | -3.575587 | -1.241366 | 0.526348  |
| 1  | 0 | -4.357912 | -0.756716 | -1.416405 |
| 1  | 0 | -2.550566 | -1.550278 | 2.394854  |
| 1  | 0 | -4.417950 | -1.867514 | 0.796857  |
| 6  | 0 | 1.382213  | 0.296314  | -0.300065 |
| 6  | 0 | 1.389672  | -0.969897 | -0.894762 |
| 6  | 0 | 2.466799  | 0.689338  | 0.484747  |
| 6  | 0 | 2.460817  | -1.833212 | -0.698466 |
| 1  | 0 | 0.548535  | -1.287917 | -1.504253 |
| 6  | 0 | 3.539095  | -0.179406 | 0.682619  |
| 1  | 0 | 2.465428  | 1.669229  | 0.947389  |
| 6  | 0 | 3.539241  | -1.438792 | 0.092526  |
| 1  | 0 | 2.453697  | -2.814726 | -1.157990 |

|   |   |          |           |          |
|---|---|----------|-----------|----------|
| 1 | 0 | 4.374449 | 0.130212  | 1.300245 |
| 1 | 0 | 4.373151 | -2.113010 | 0.248369 |

I

|    |   |           |           |           |
|----|---|-----------|-----------|-----------|
| 15 | 0 | 0.047453  | 1.221119  | -0.594791 |
| 8  | 0 | 0.103831  | 2.600482  | 0.016304  |
| 6  | 0 | -1.472695 | 0.316191  | -0.220146 |
| 6  | 0 | -1.863389 | -0.771435 | -1.007264 |
| 6  | 0 | -2.280567 | 0.748493  | 0.834825  |
| 6  | 0 | -3.042185 | -1.447079 | -0.714170 |
| 1  | 0 | -1.255324 | -1.085230 | -1.849660 |
| 6  | 0 | -3.460993 | 0.070227  | 1.118538  |
| 1  | 0 | -1.980480 | 1.605926  | 1.426463  |
| 6  | 0 | -3.838824 | -1.027407 | 0.348664  |
| 1  | 0 | -3.342988 | -2.293360 | -1.319733 |
| 1  | 0 | -4.085785 | 0.398019  | 1.940683  |
| 1  | 0 | -4.759467 | -1.552730 | 0.573054  |
| 6  | 0 | 1.478532  | 0.193886  | -0.166287 |
| 6  | 0 | 1.395568  | -1.192599 | -0.008306 |
| 6  | 0 | 2.712151  | 0.841111  | -0.034488 |
| 6  | 0 | 2.541537  | -1.921884 | 0.290984  |
| 1  | 0 | 0.444282  | -1.703336 | -0.098072 |
| 6  | 0 | 3.851521  | 0.104966  | 0.266137  |
| 1  | 0 | 2.772959  | 1.916692  | -0.157793 |
| 6  | 0 | 3.767458  | -1.276350 | 0.427338  |
| 1  | 0 | 2.474080  | -2.994955 | 0.423958  |
| 1  | 0 | 4.804543  | 0.608393  | 0.375819  |
| 1  | 0 | 4.657049  | -1.848774 | 0.661757  |

## 6. Photo of the reaction set up and spectral distribution of the blue LED light

A photo of the blue LEDs ( $3 \times 10W$ ) and reaction set up is shown below.

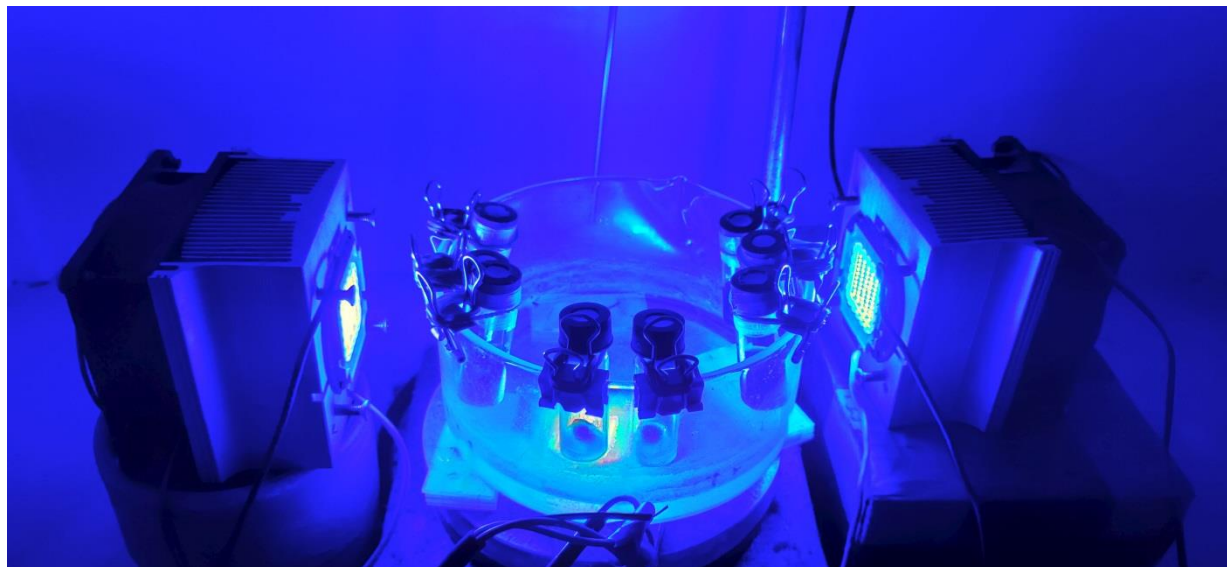

The spectral irradiance for the blue LED was measured at National Institute of Measurement and Testing Technology (No. 10, Yushuang Road, Chengdu, 610021, China), and the spectral distribution is shown below.

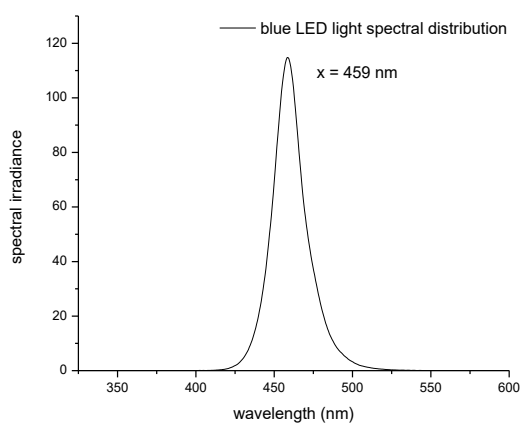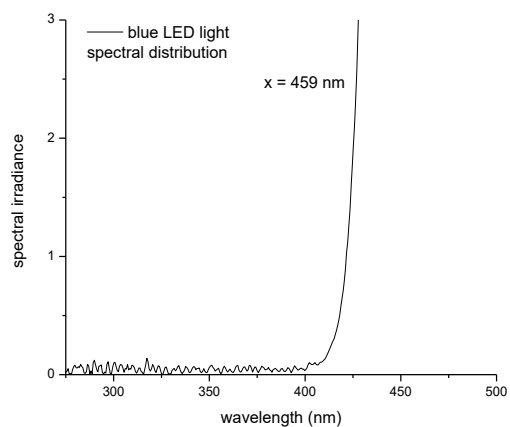



## 7. UV-visible light absorption spectra of aldehyde catalysts and 1a

UV-visible light absorption spectra were measured by PerkinElmer Lambda 950 UV/VIS/NIR Spectrometer.

Sample (left): catalyst ( $10^{-4}$  mol/L) in distilled water.

Sample (right): catalyst ( $10^{-4}$  mol/L) and  $\text{Na}_2\text{CO}_3$  ( $10^{-2}$  mol/L) in distilled water.

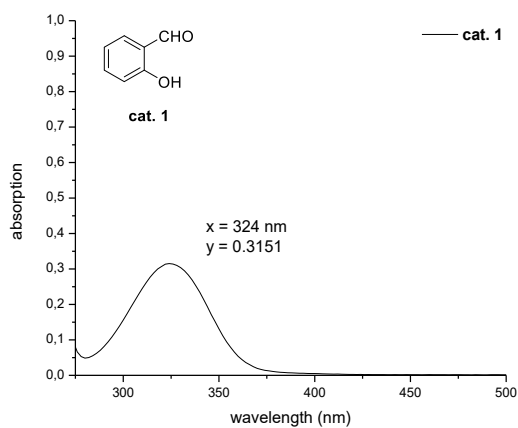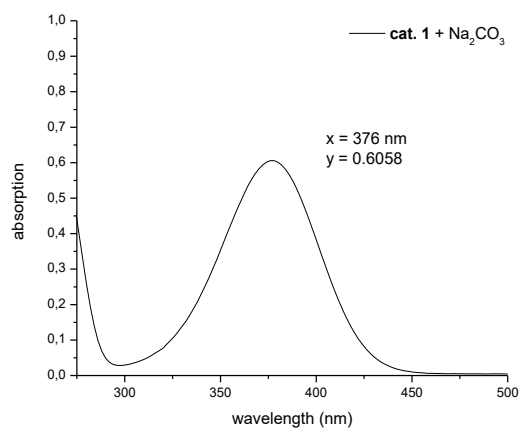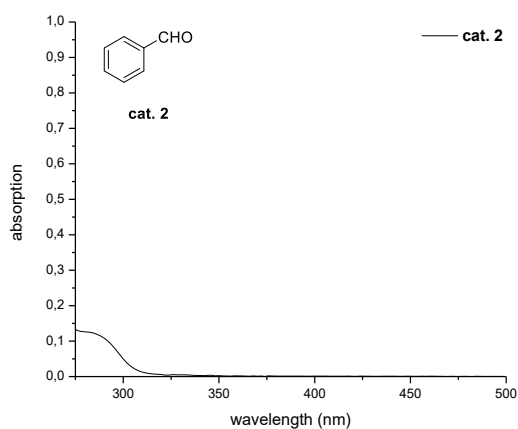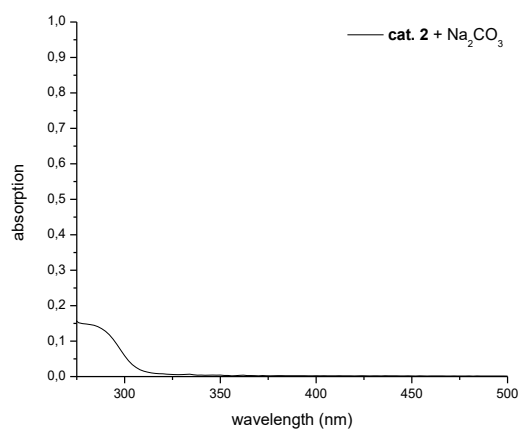

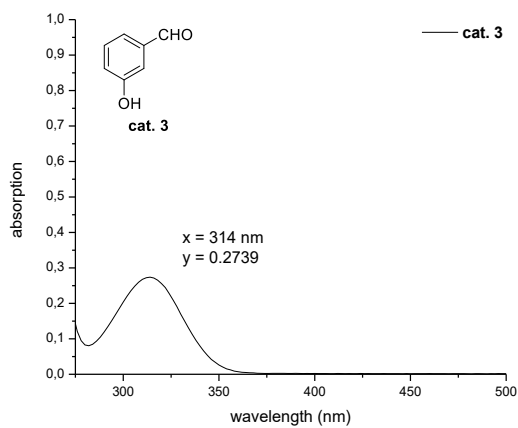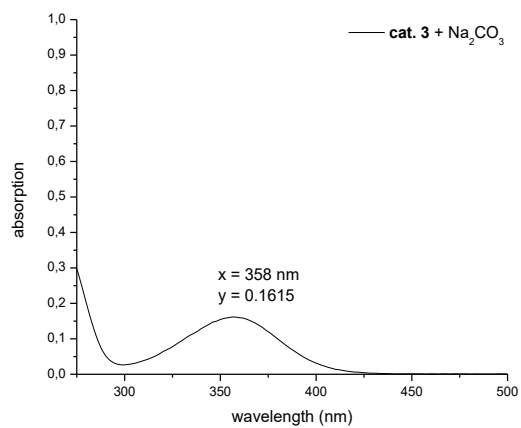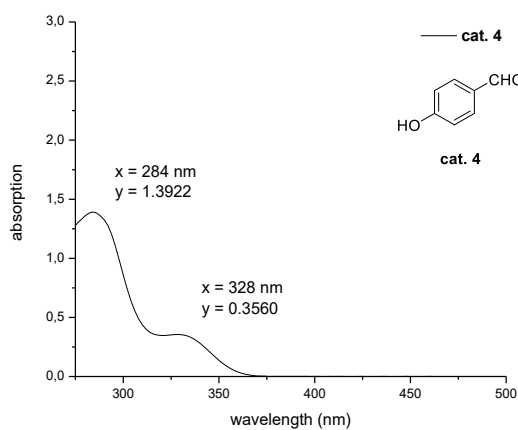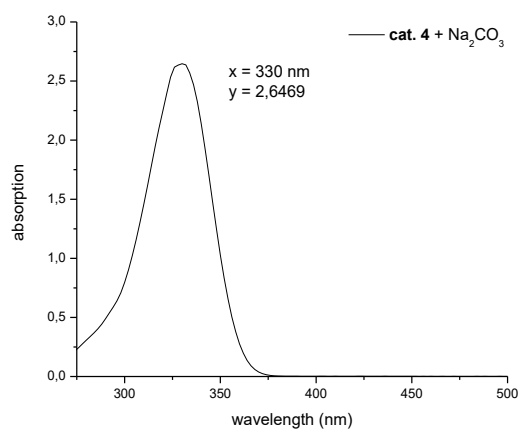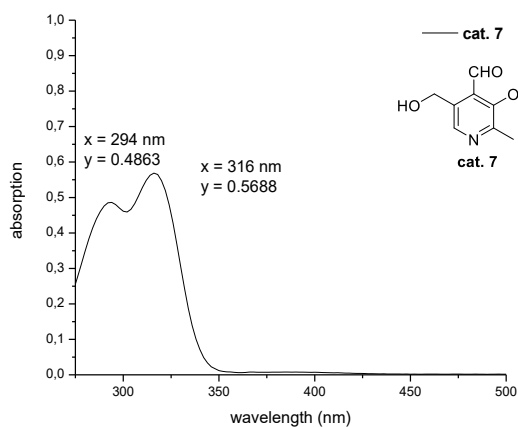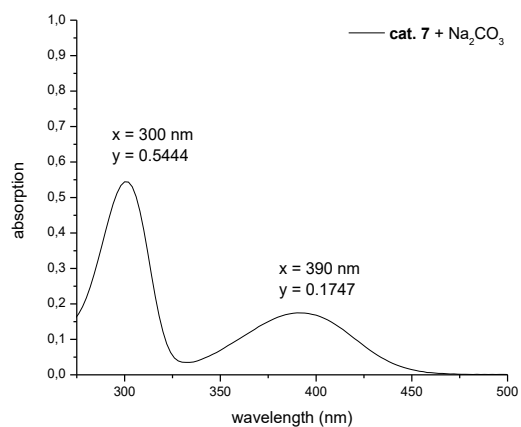

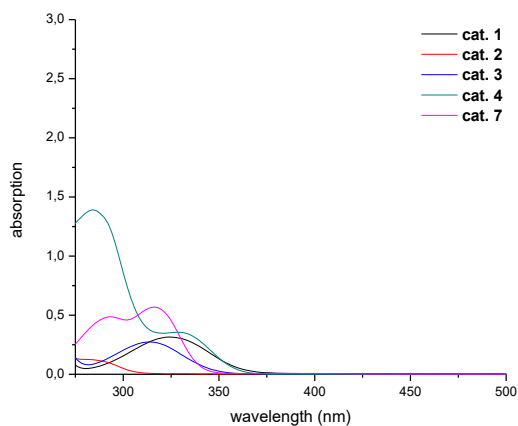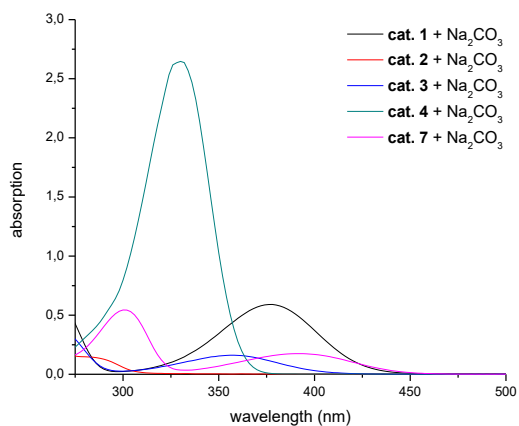

Sample (left): **1a** ( $10^{-4}$  mol/L) in distilled water.

Sample (right): **1a** ( $10^{-4}$  mol/L) and  $\text{Na}_2\text{CO}_3$  ( $2.5 \times 10^{-4}$  mol/L) in distilled water.

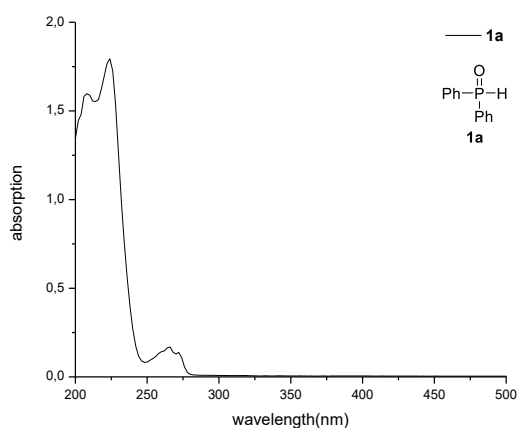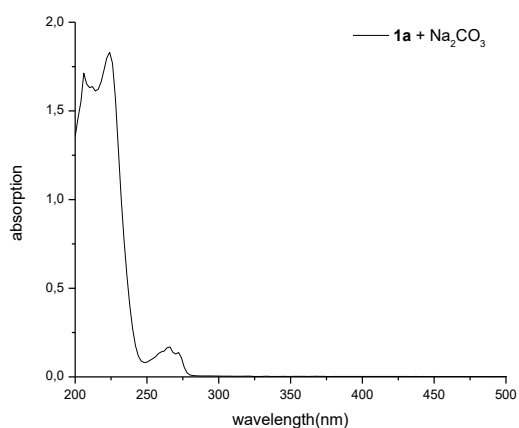

## 8. Fluorescence emission spectra and fluorescence quantum yield of salicylaldehyde

Fluorescence emission spectra of salicylaldehyde were measured by Horiba FluoroMax-4 Spectrofluorometer under excitation at 376nm, 400nm, 417 nm and 425 nm (slit 2nm).

Sample: salicylaldehyde **cat. 1** ( $10^{-4}$  mol/L) and  $\text{Na}_2\text{CO}_3$  ( $10^{-2}$  mol/L) in distilled water.

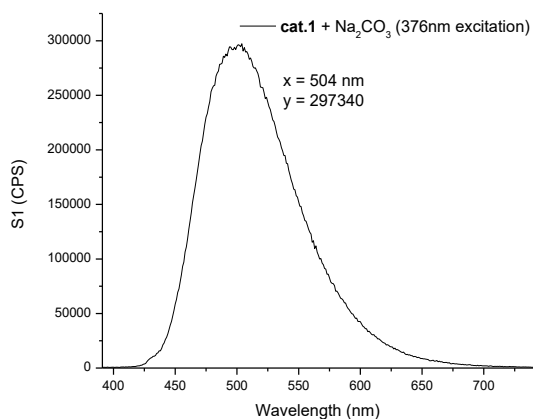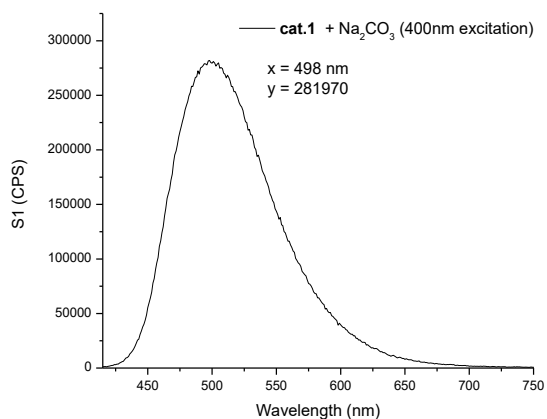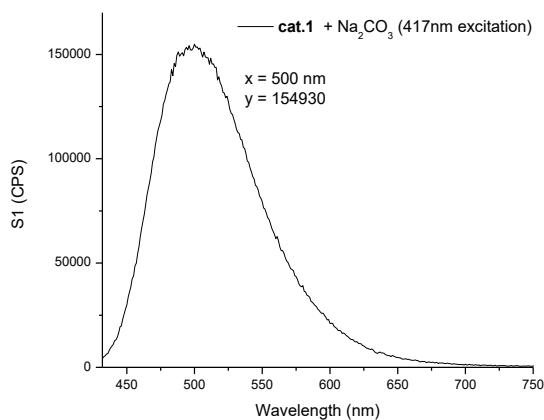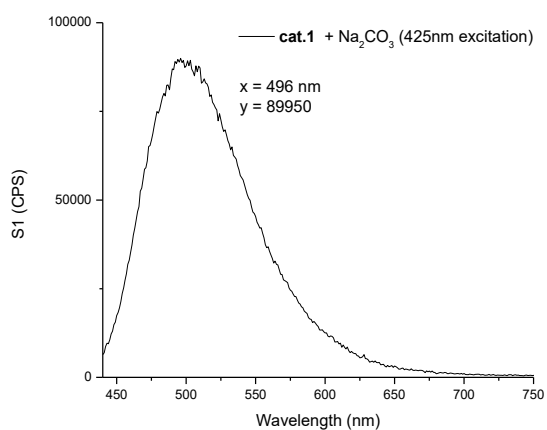

The absolute fluorescence quantum yield of salicylaldehyde was measured by Horiba Quanta- $\phi$  Spectrometer at 417nm: 2.10 (abs error  $\pm 0.136$ , relative error  $\pm 0.06488$ ).

Sample: salicylaldehyde **cat. 1** ( $10^{-4}$  mol/L) and  $\text{Na}_2\text{CO}_3$  ( $10^{-2}$  mol/L) in distilled water.

# 9. <sup>1</sup>H NMR, <sup>13</sup>C NMR and <sup>31</sup>P NMR spectra of novel compounds

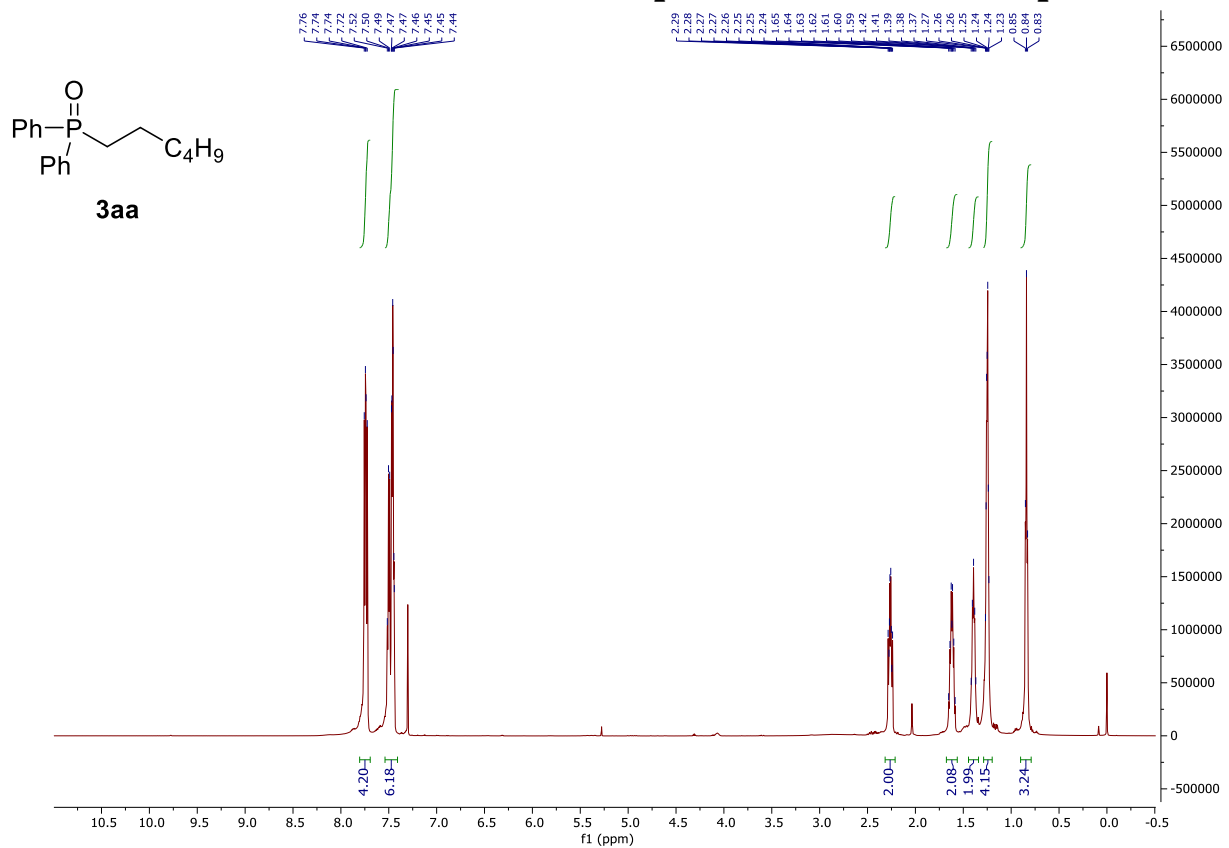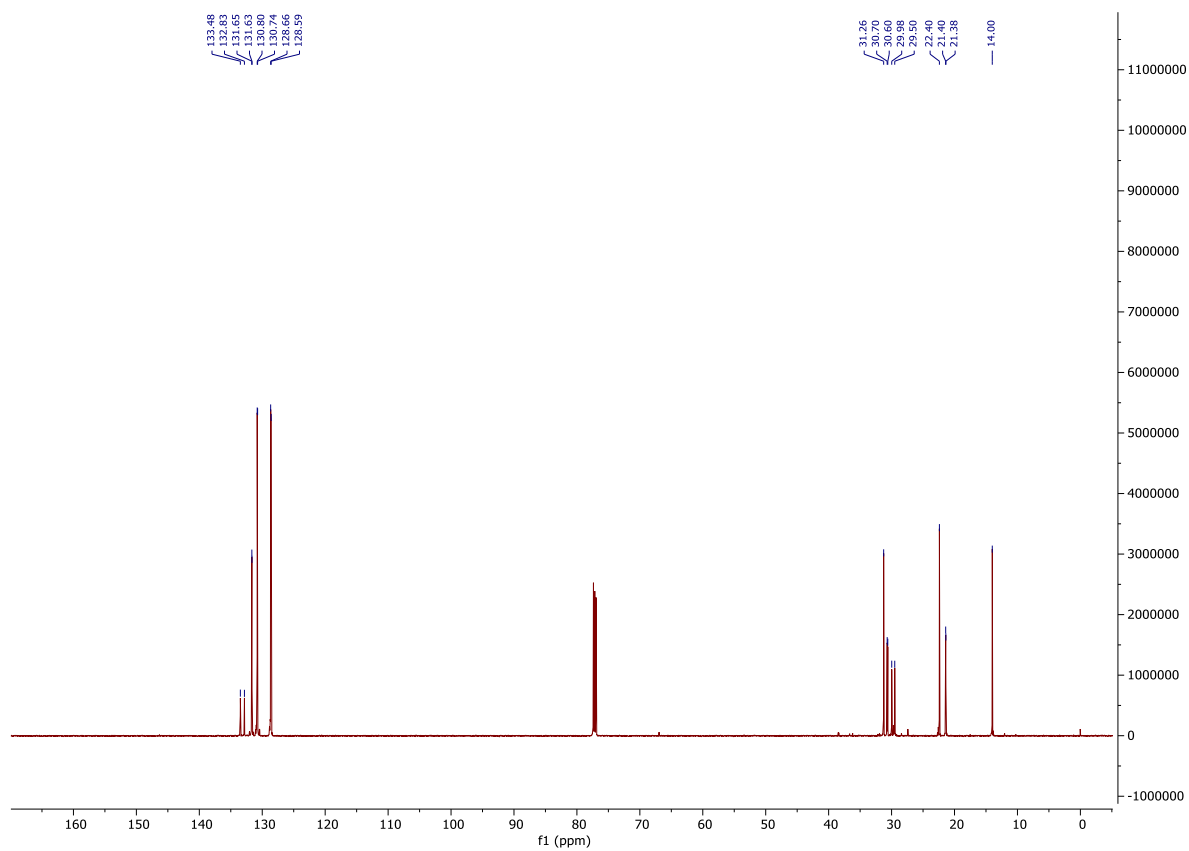

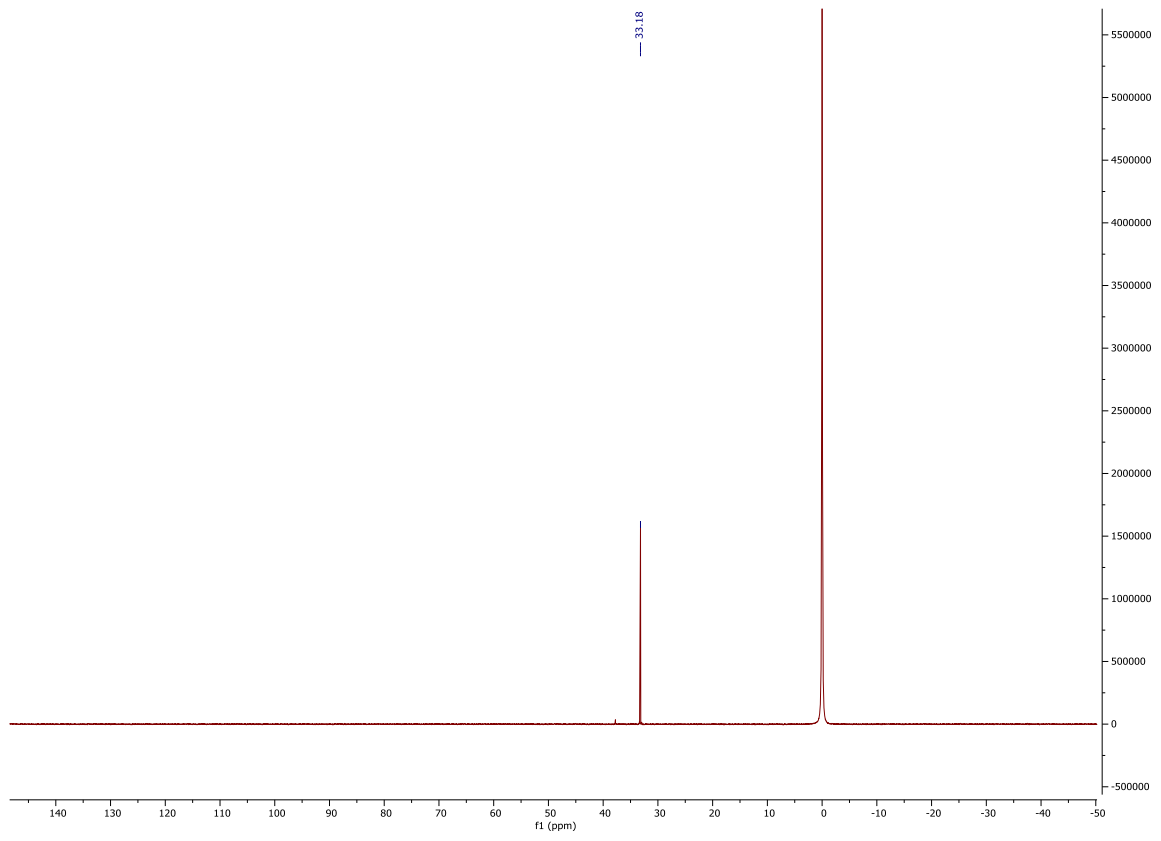

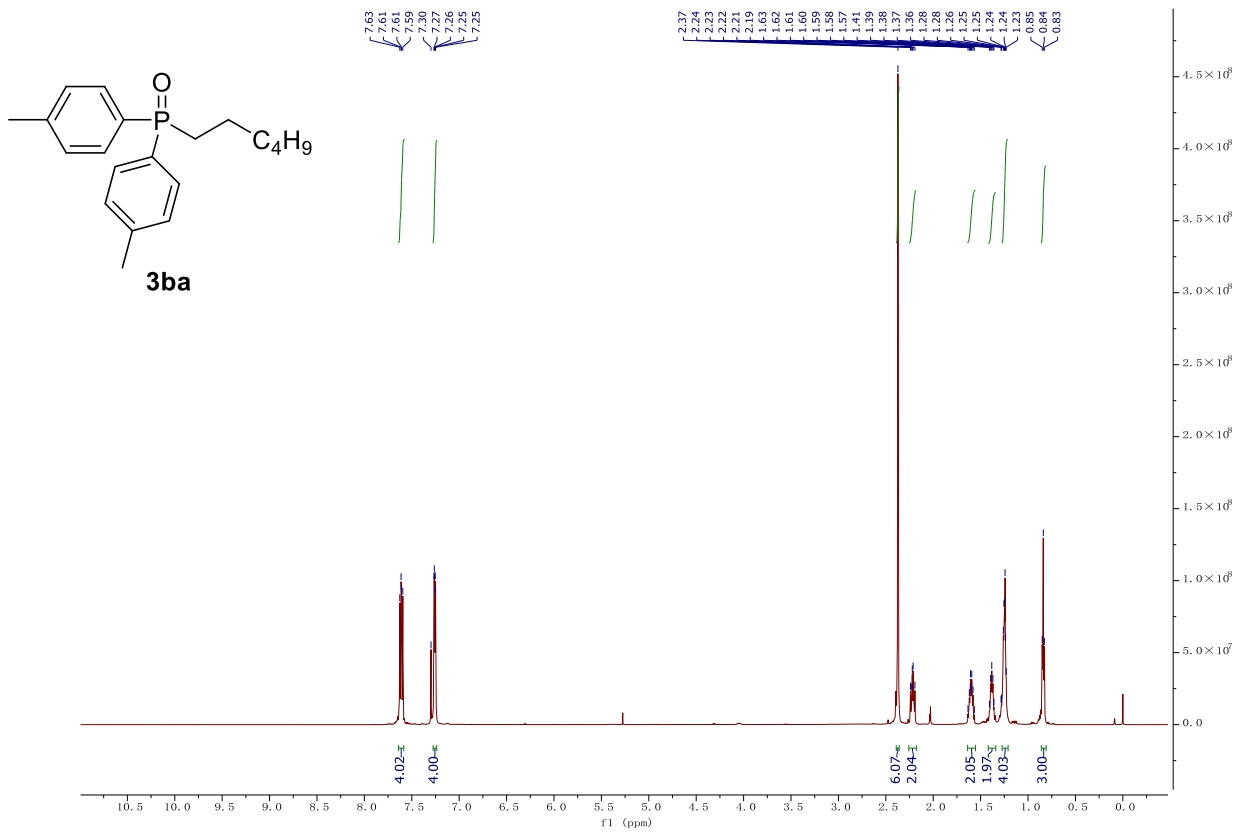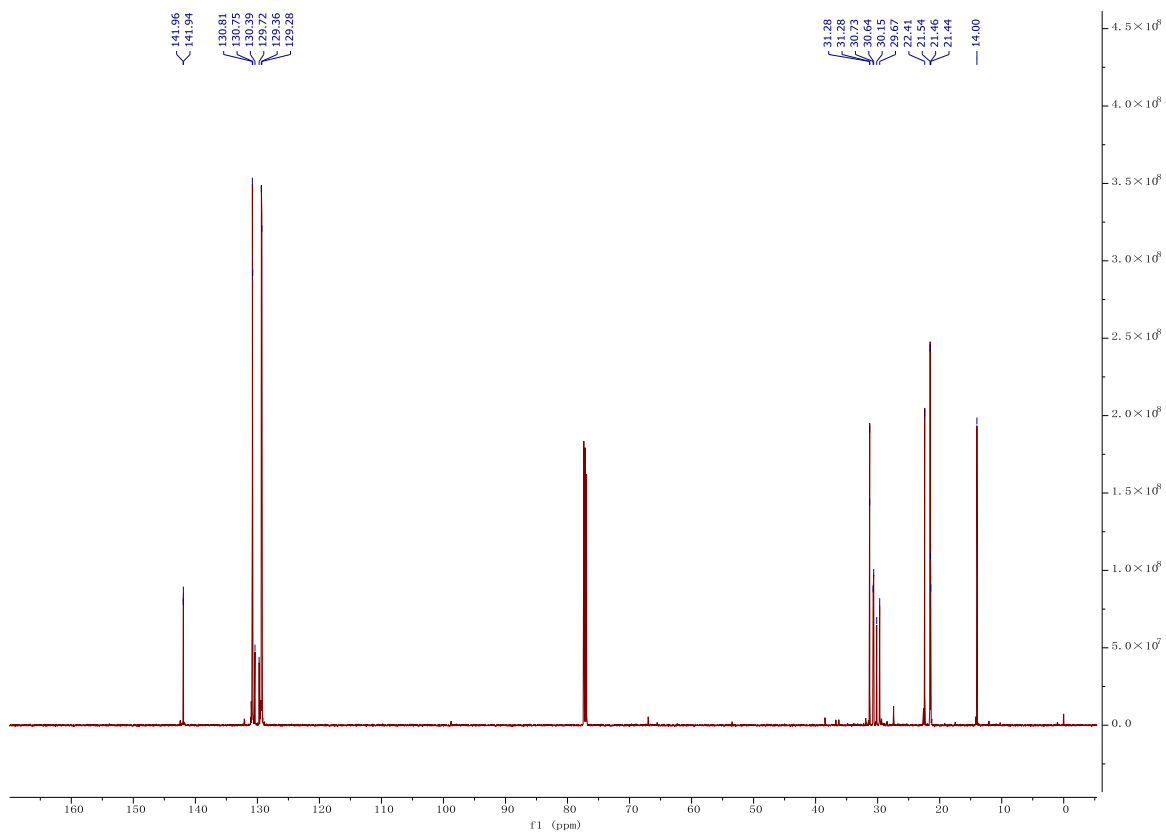

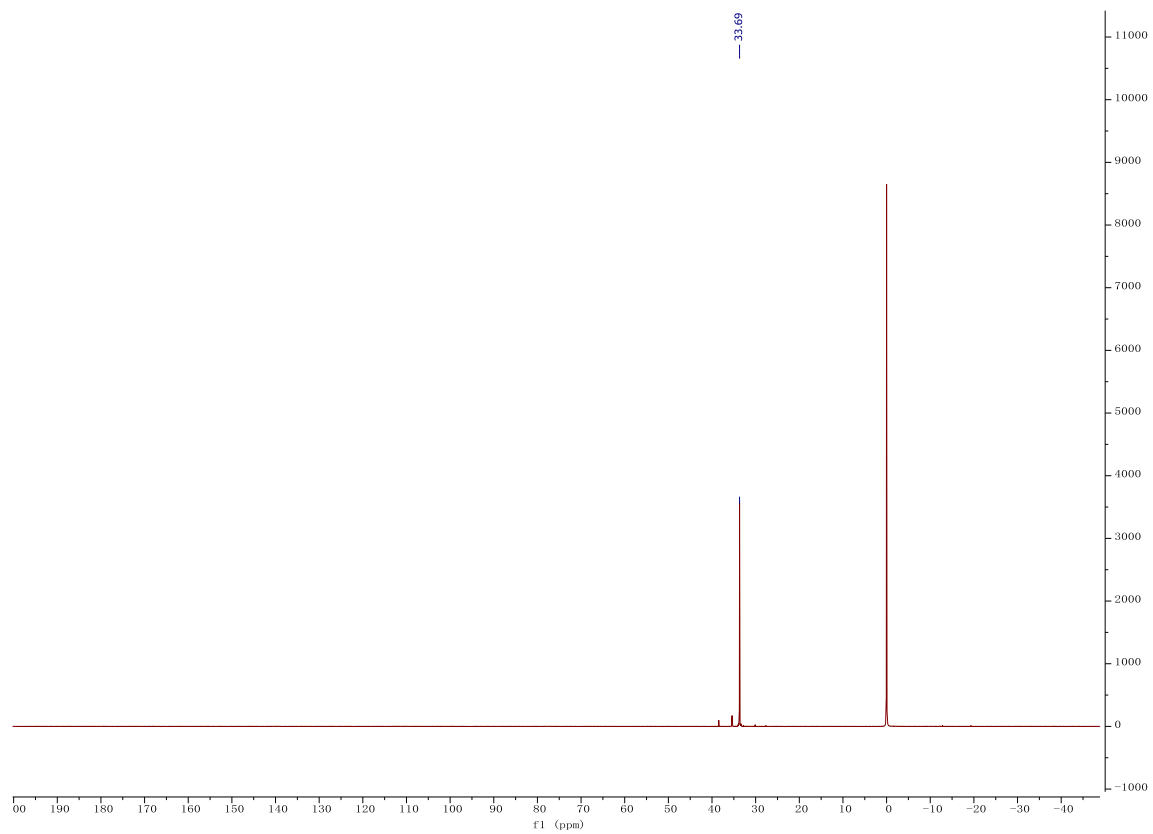



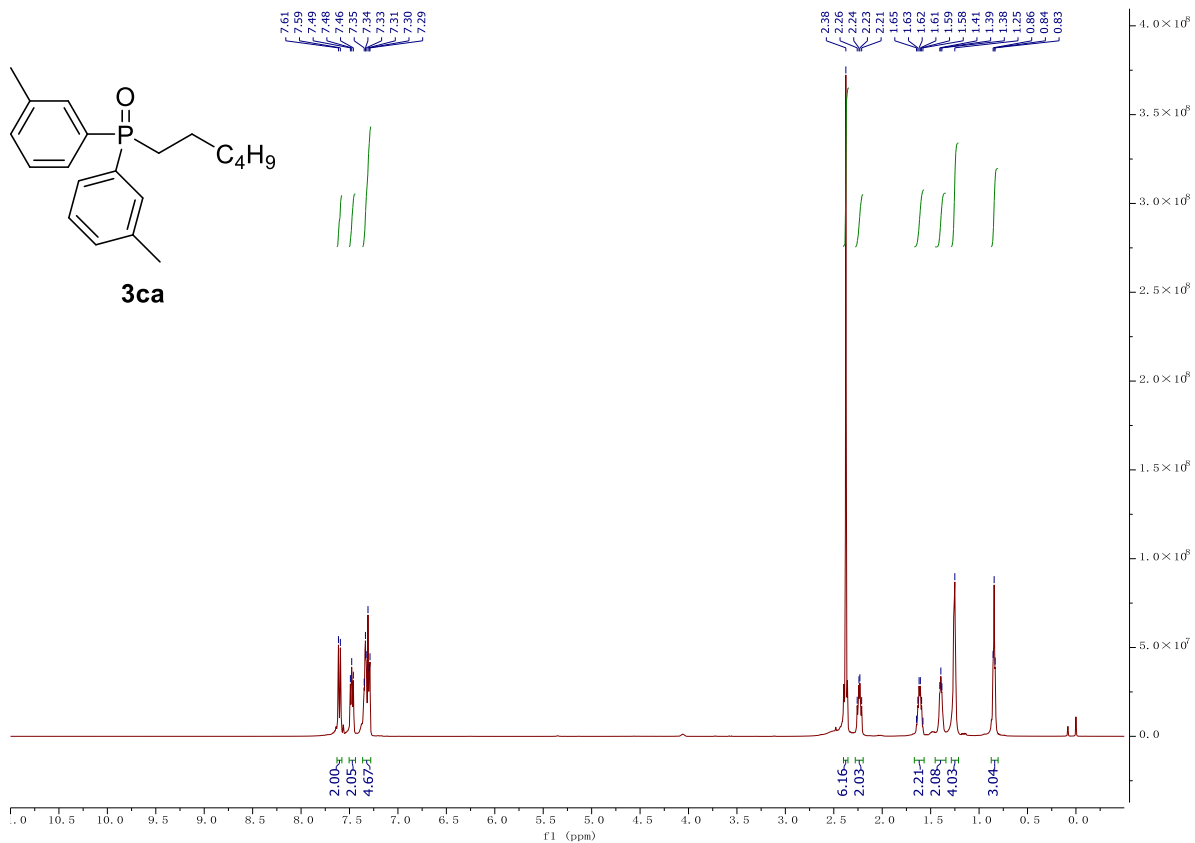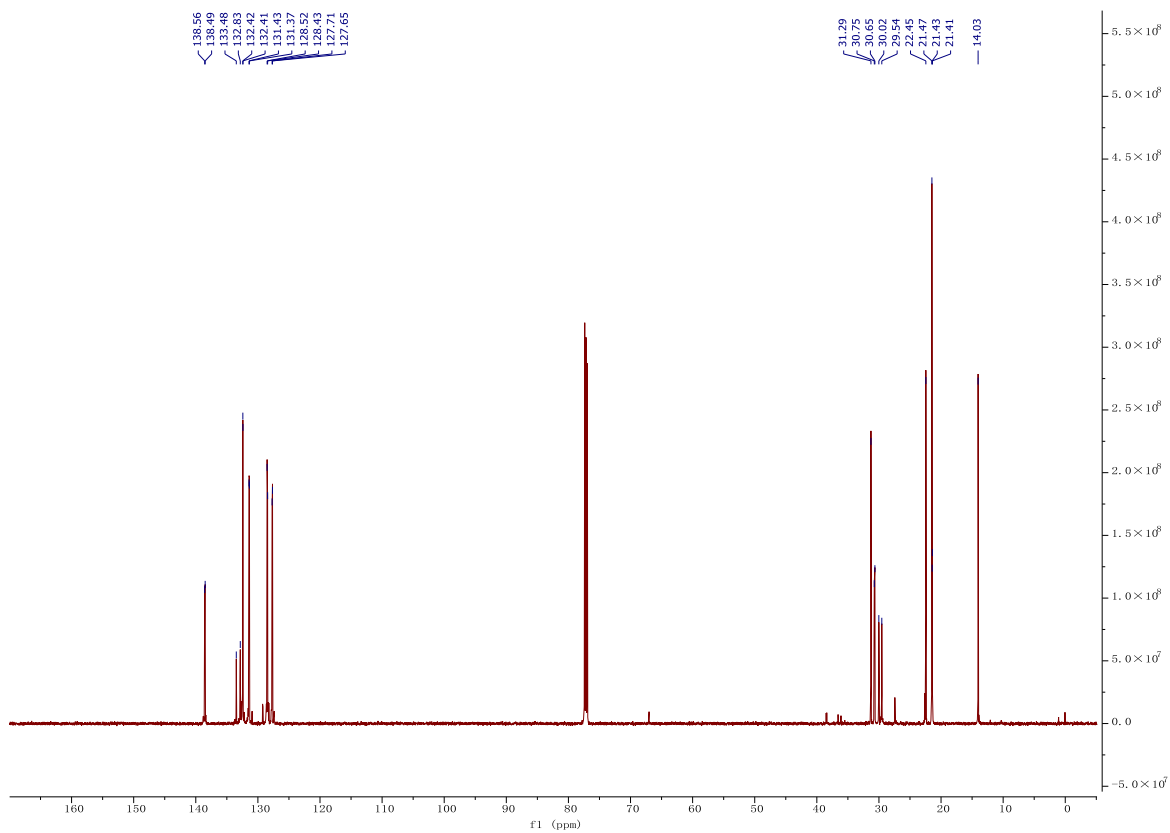

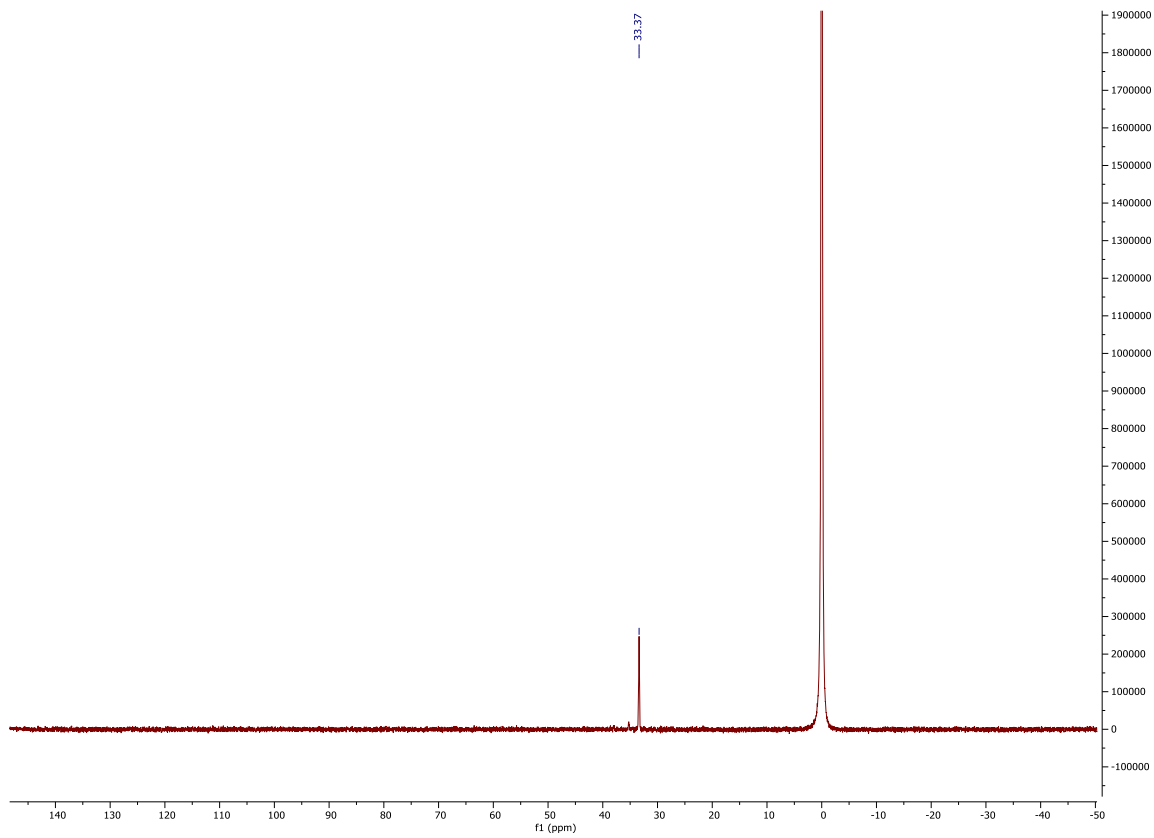

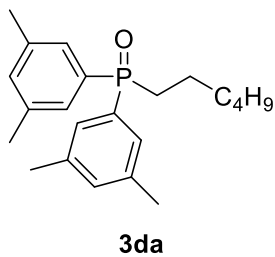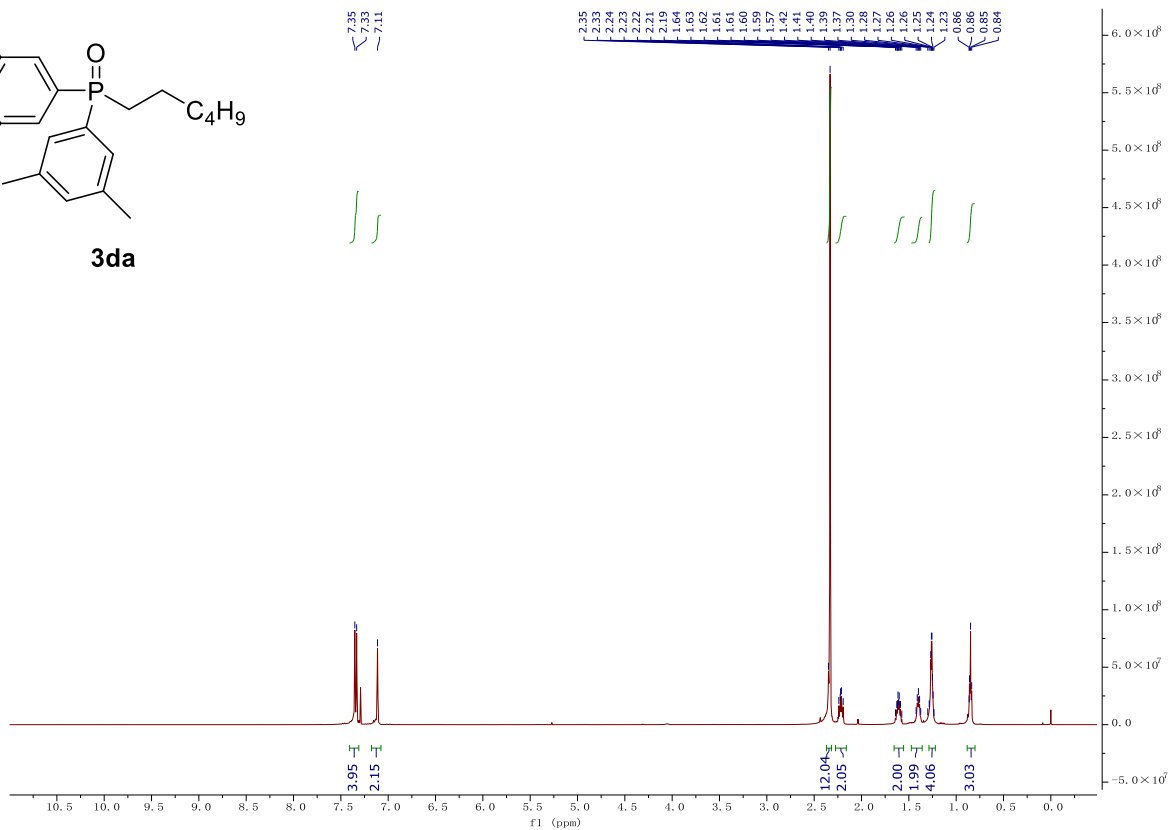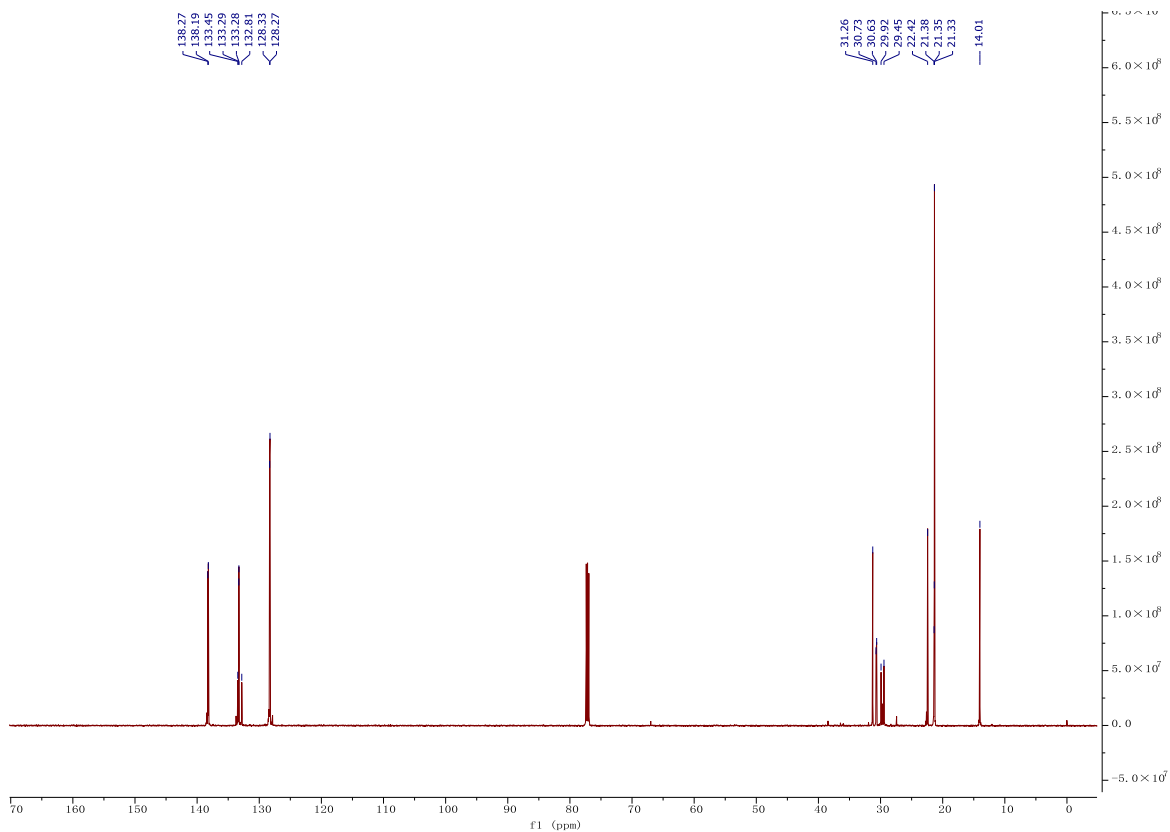

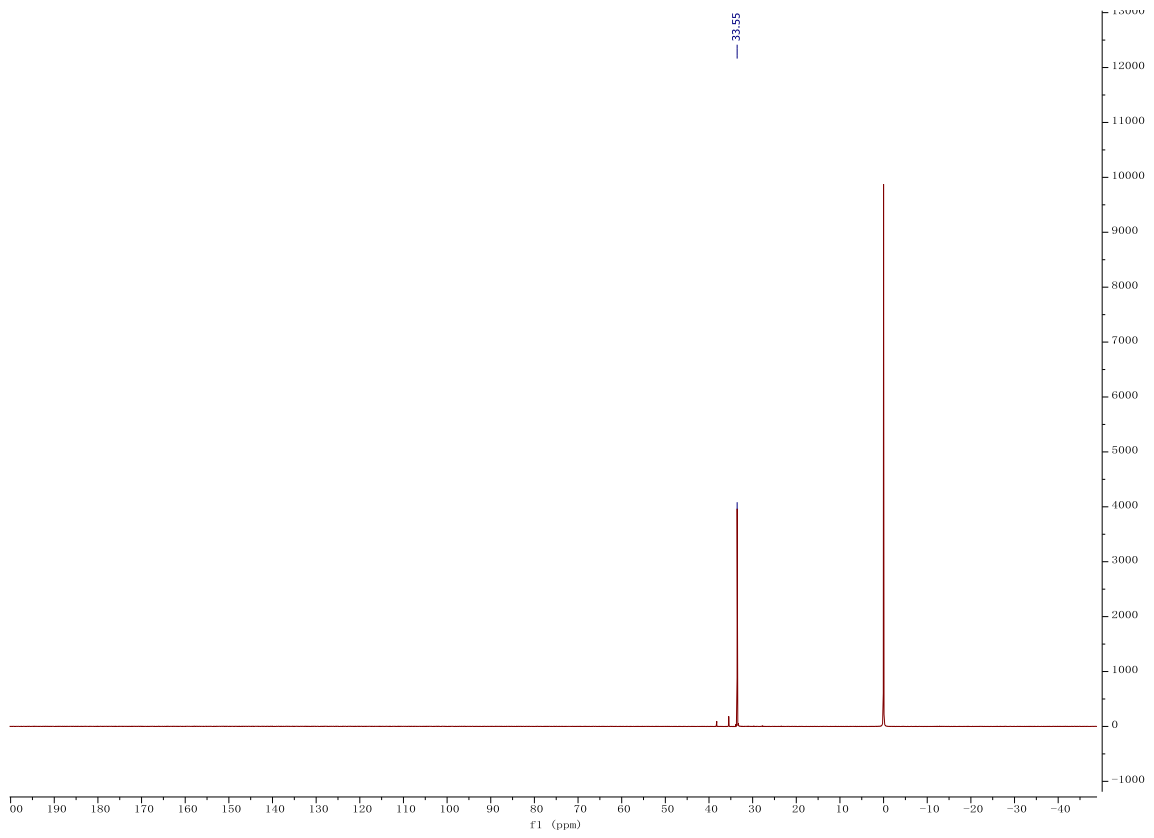

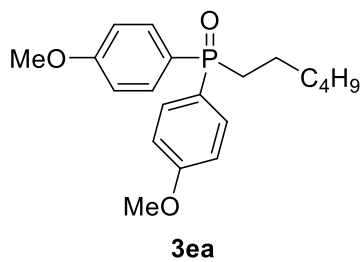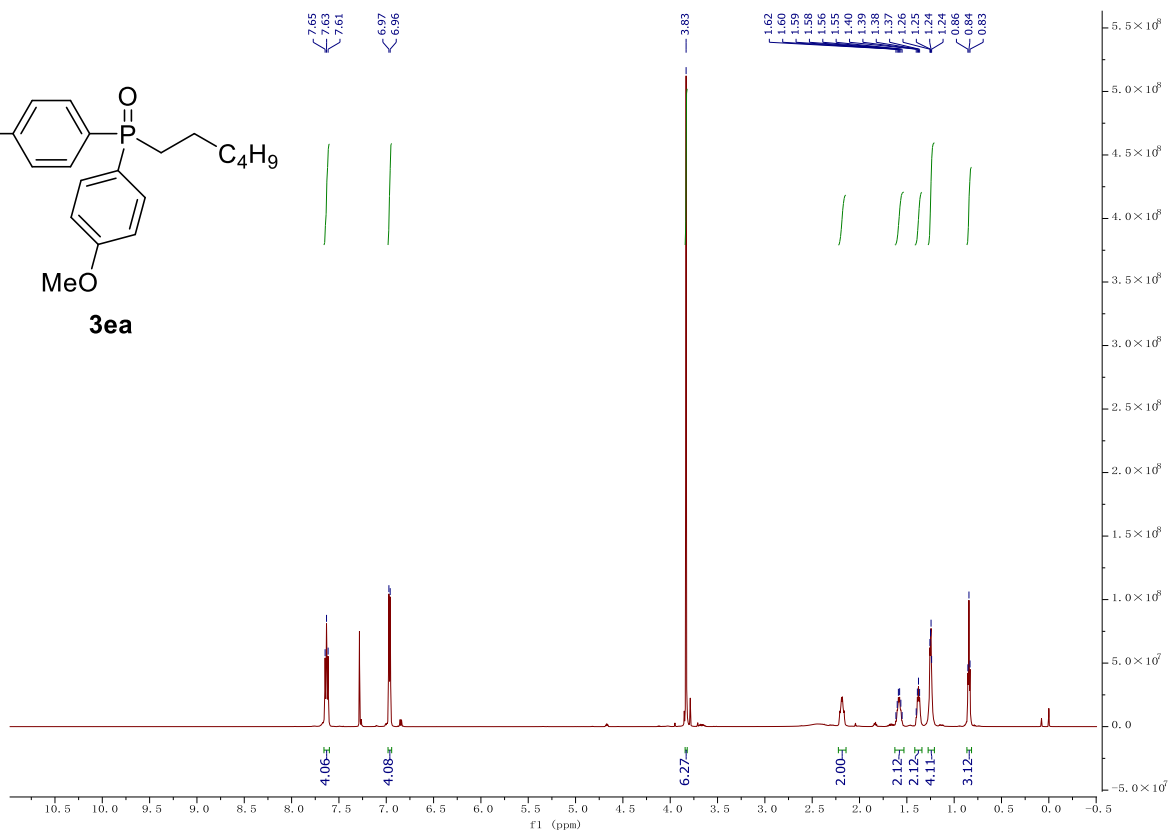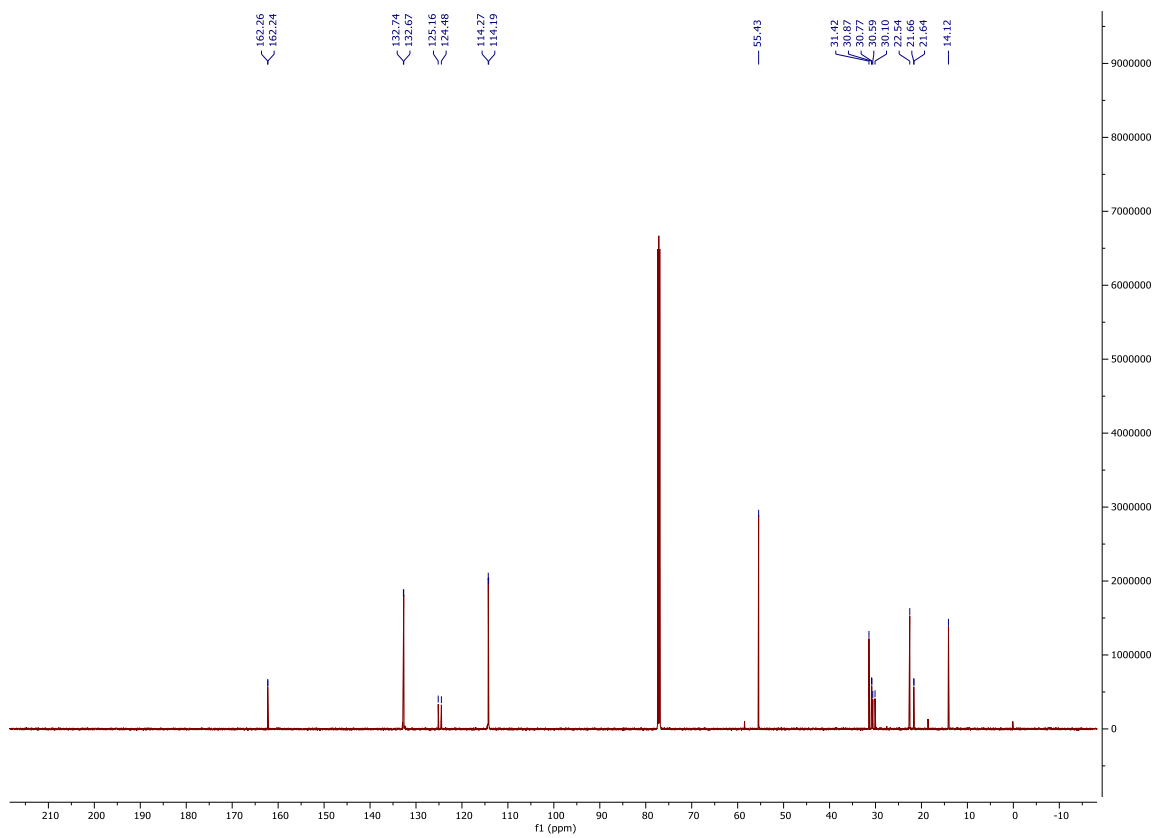

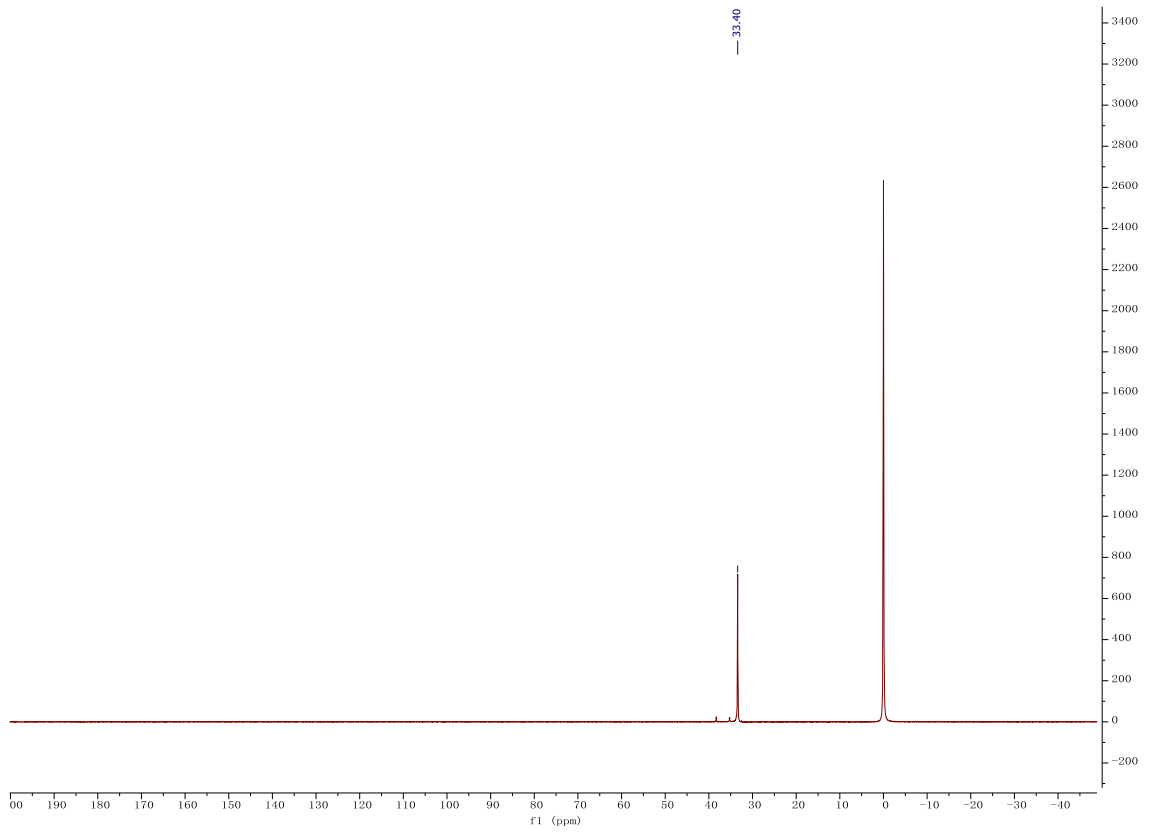

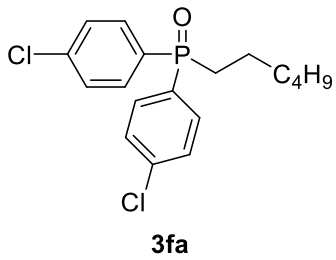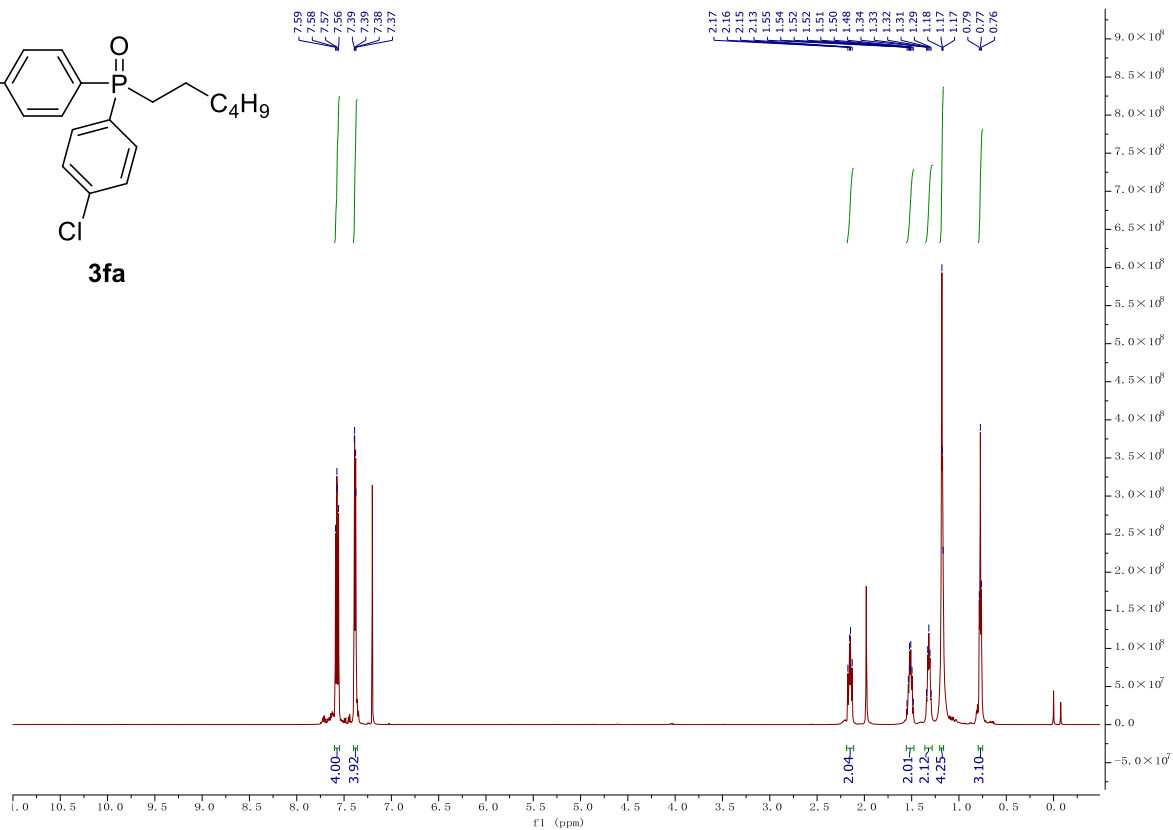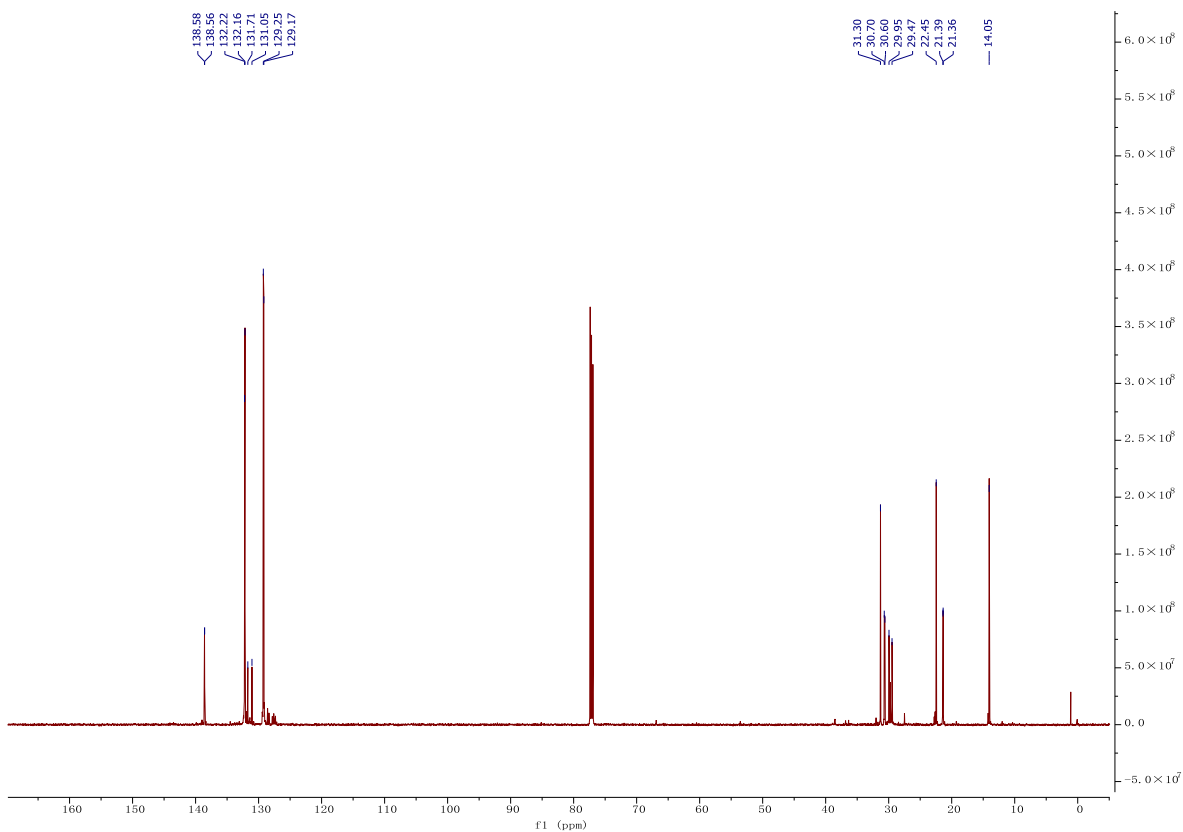

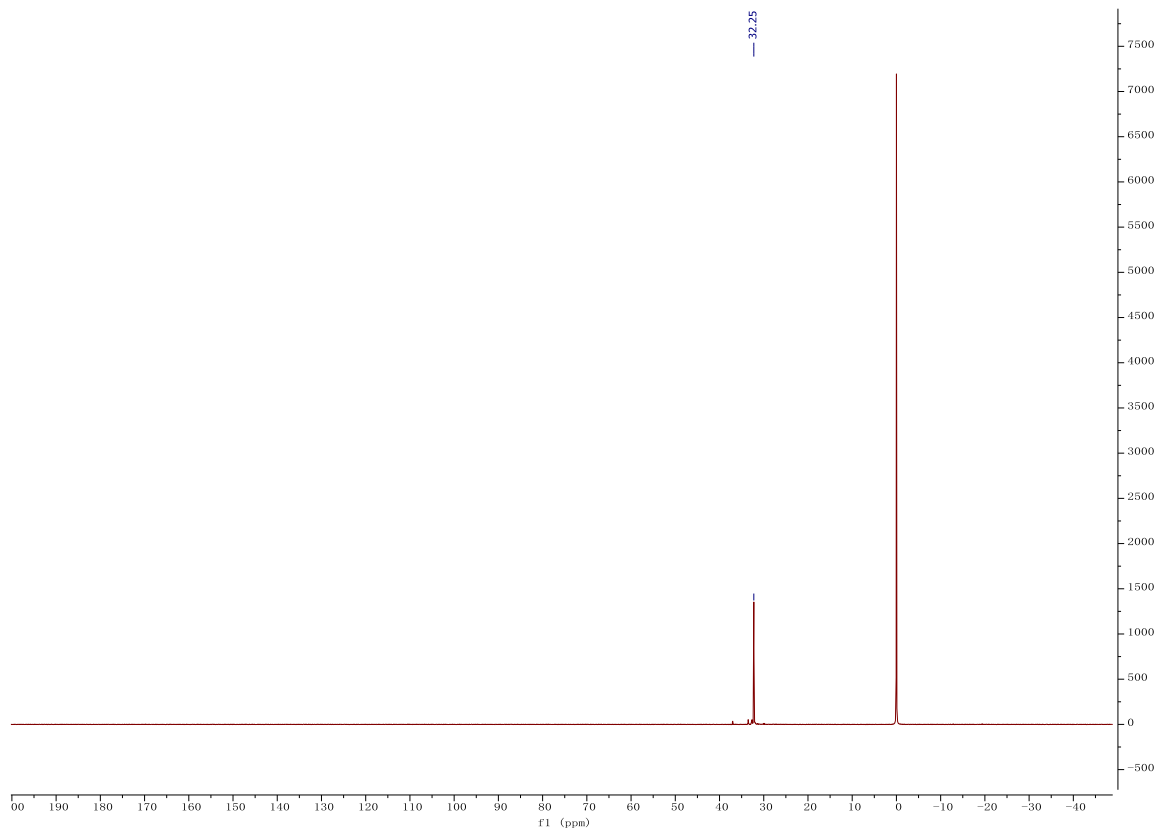



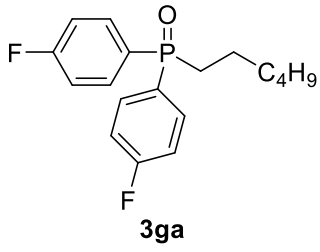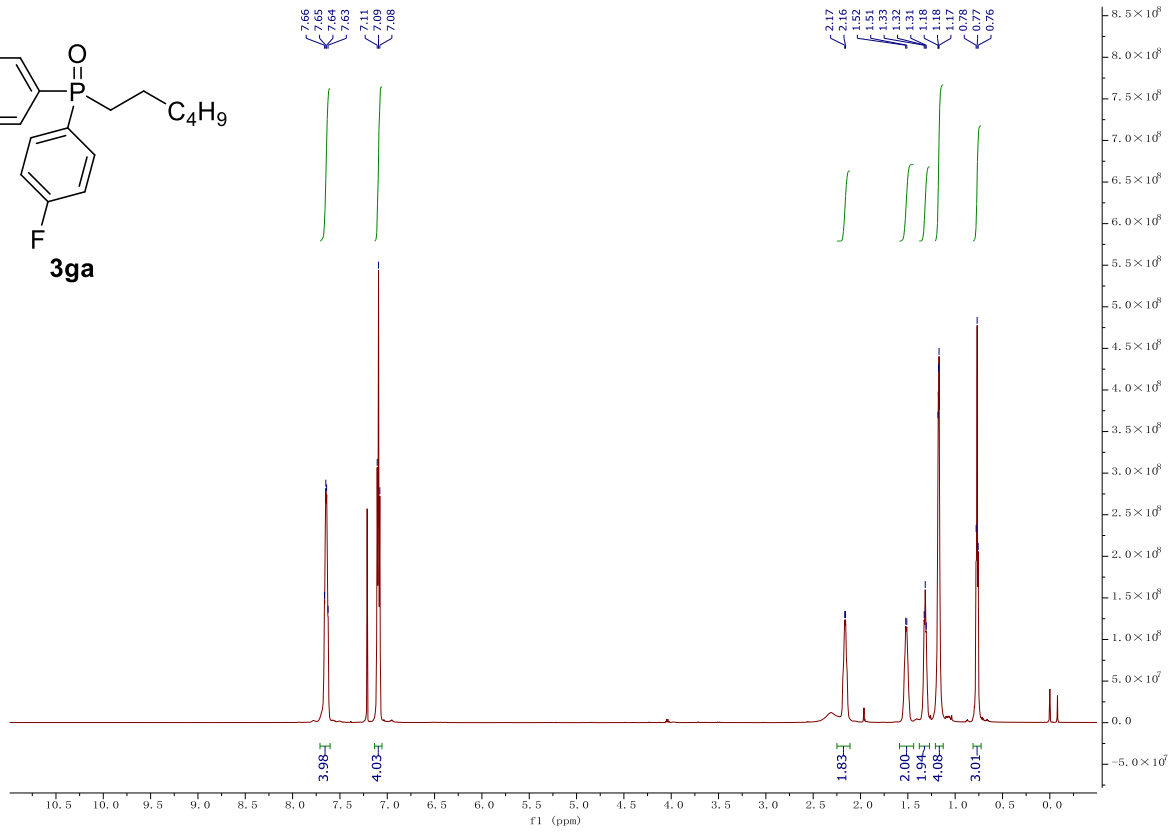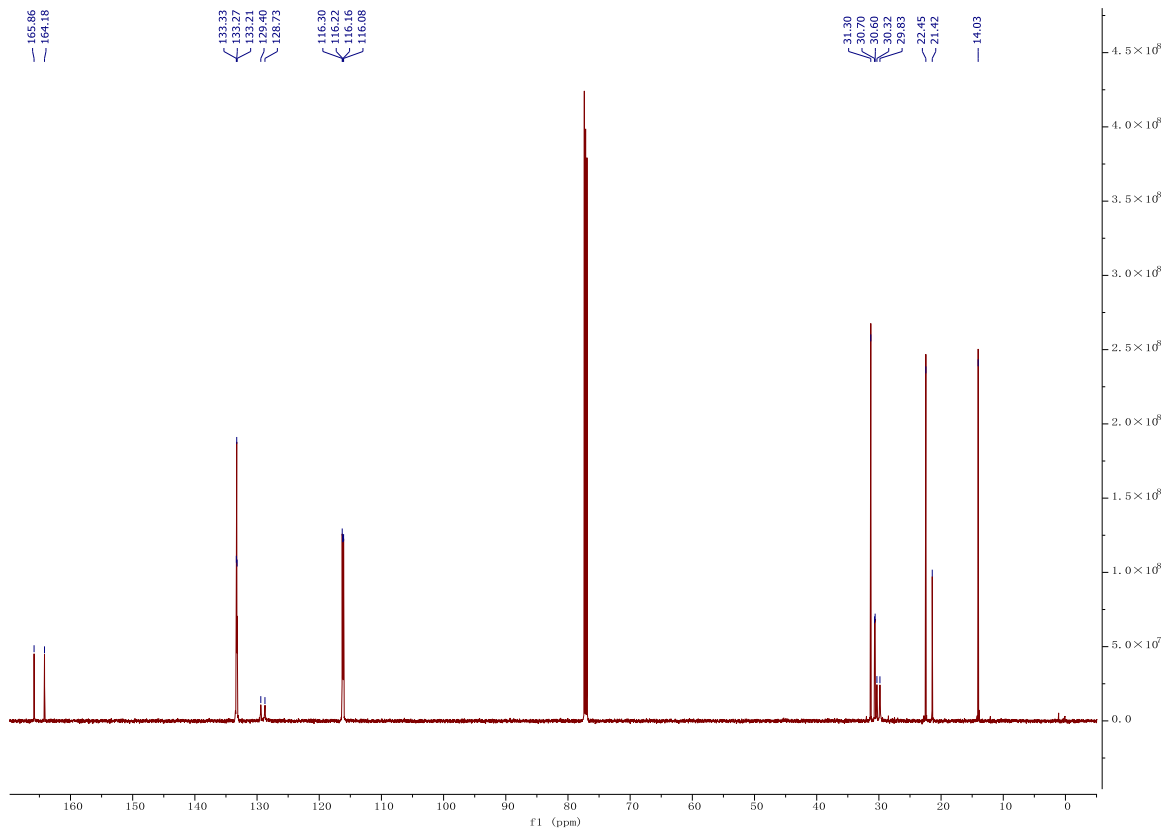

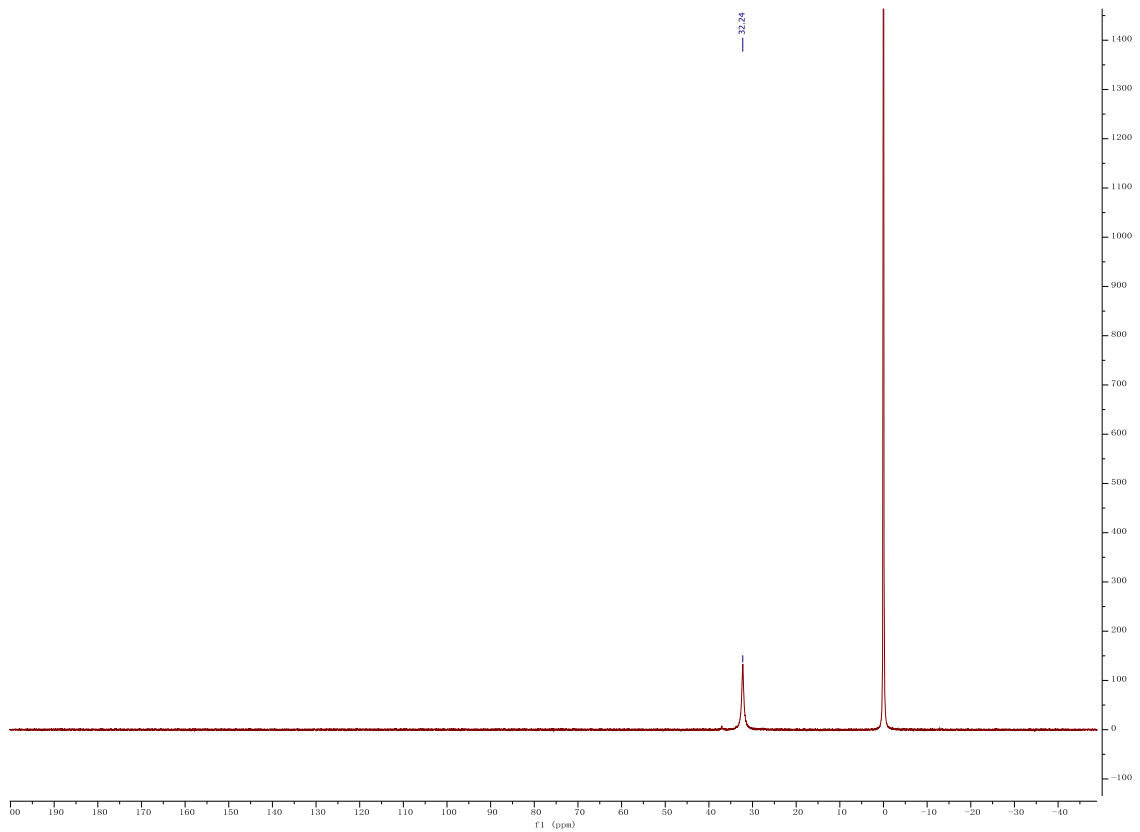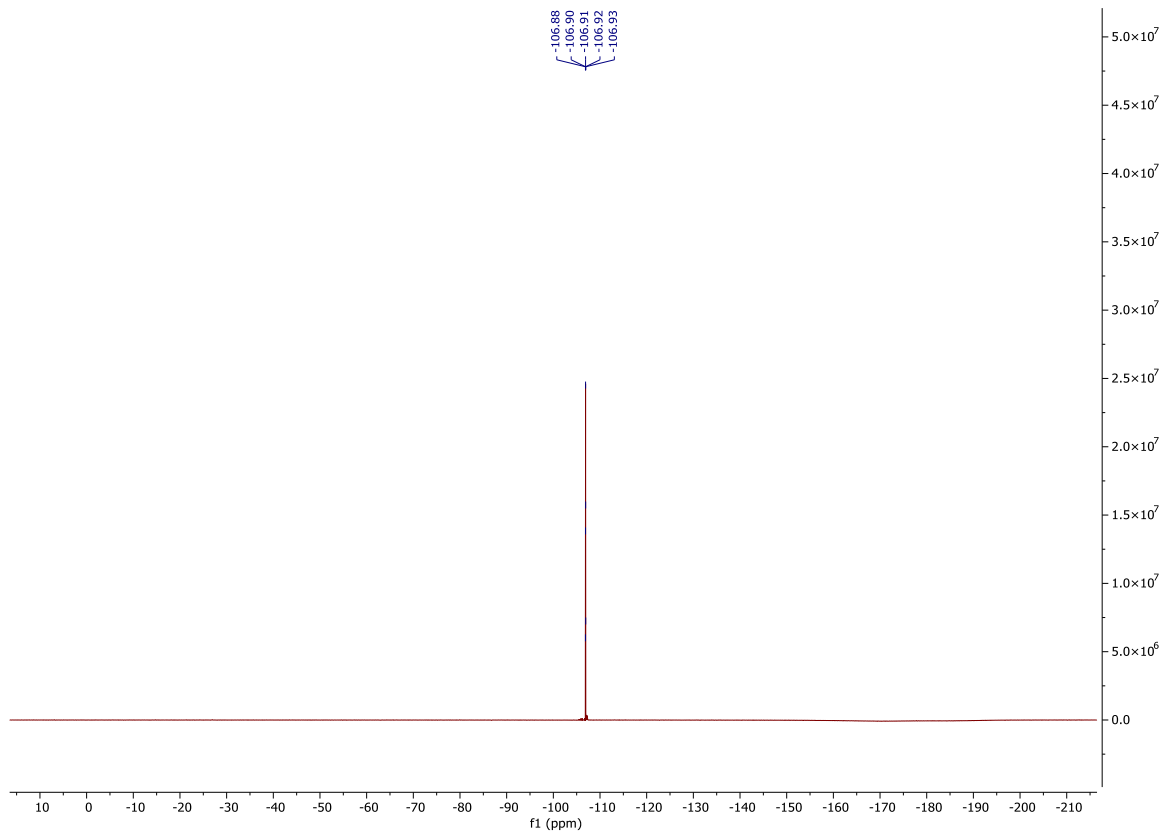

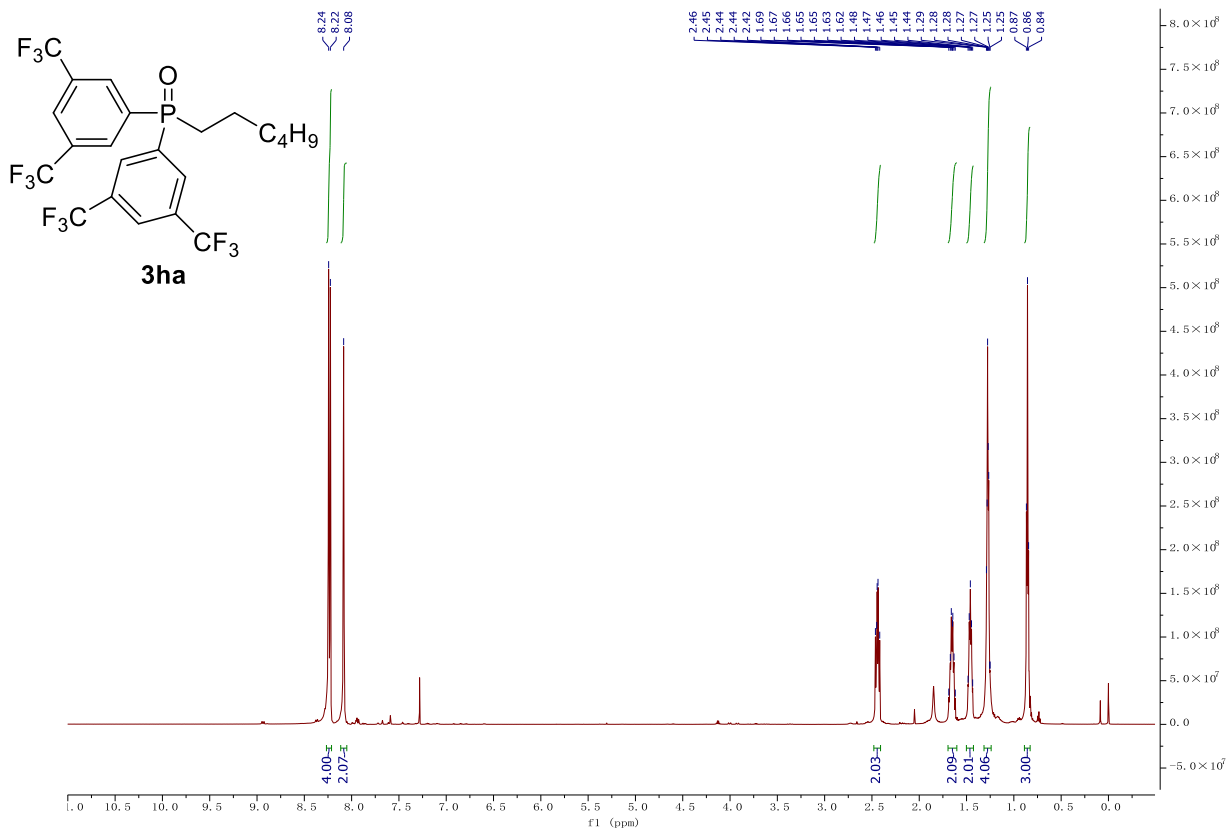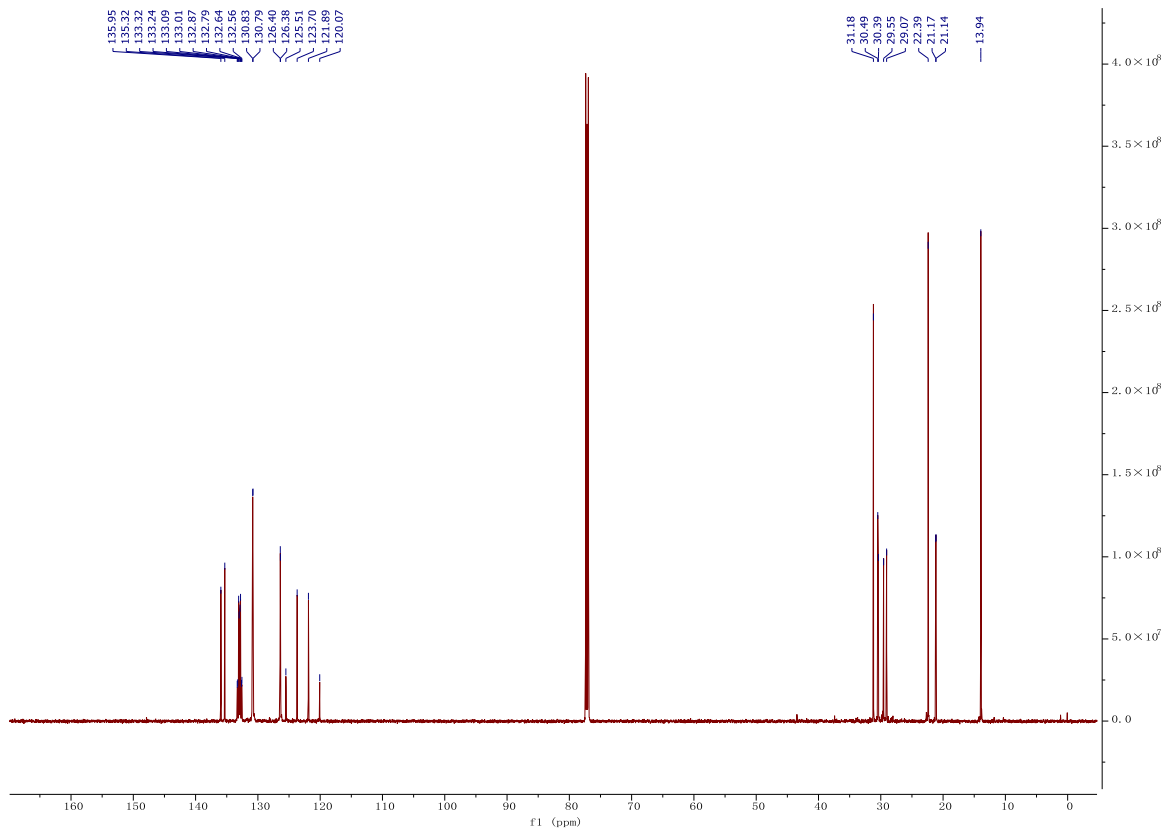

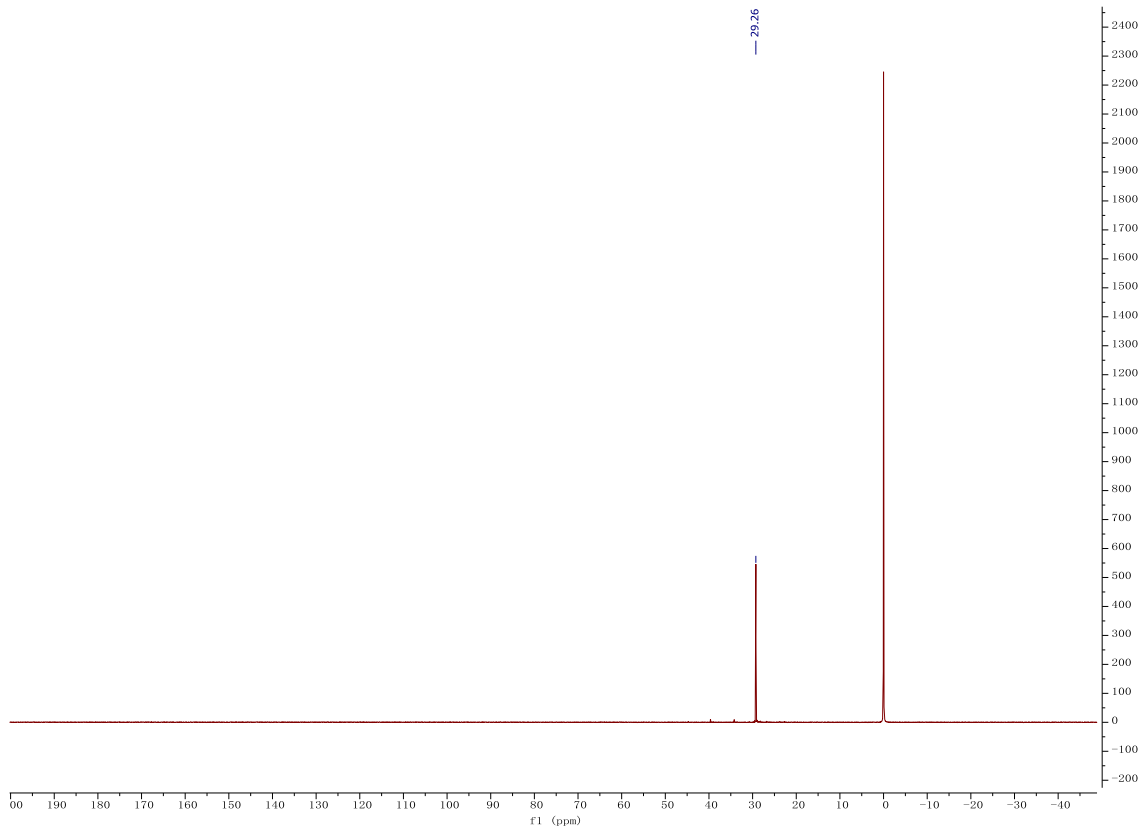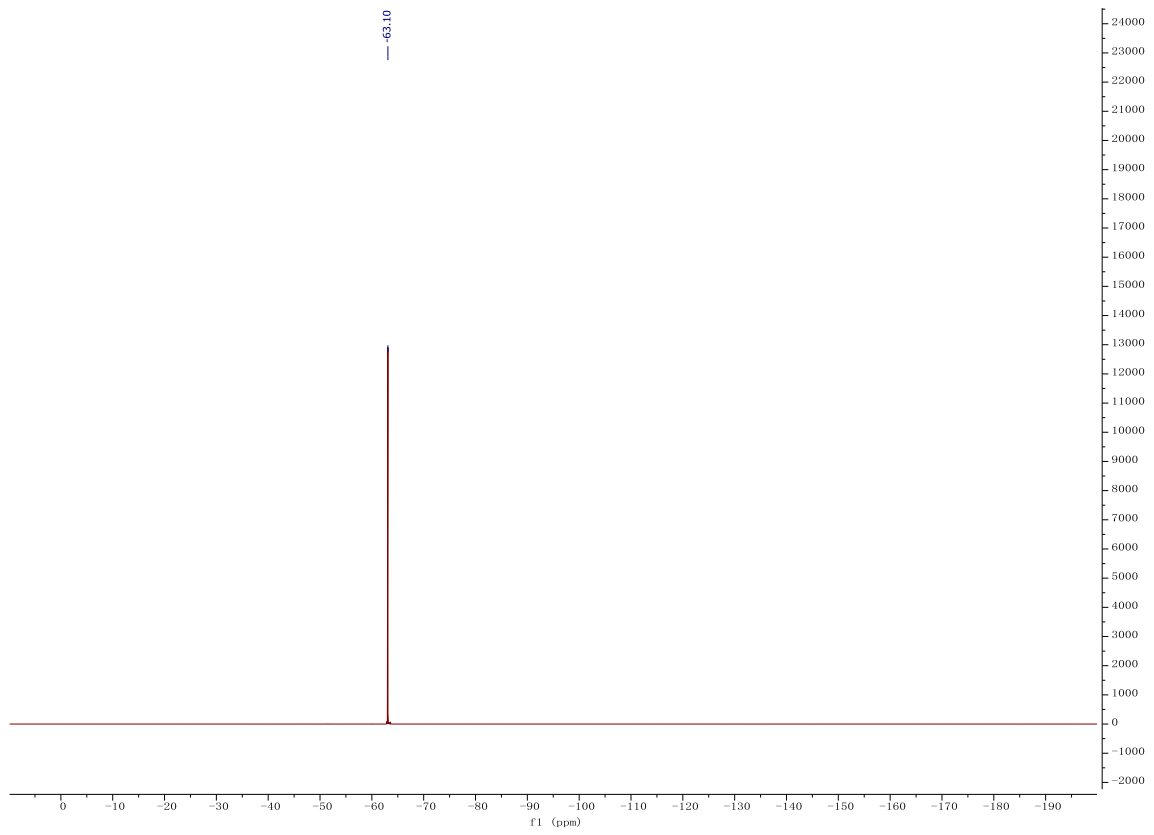

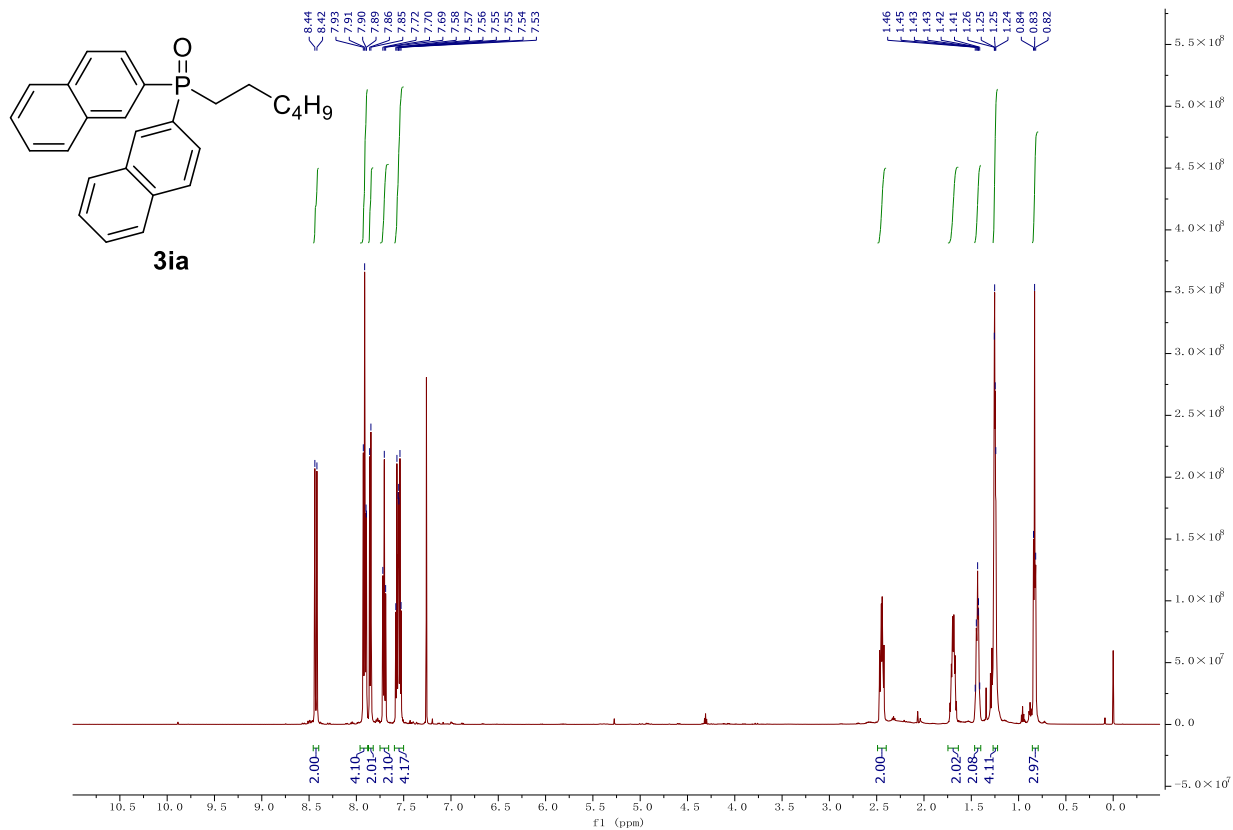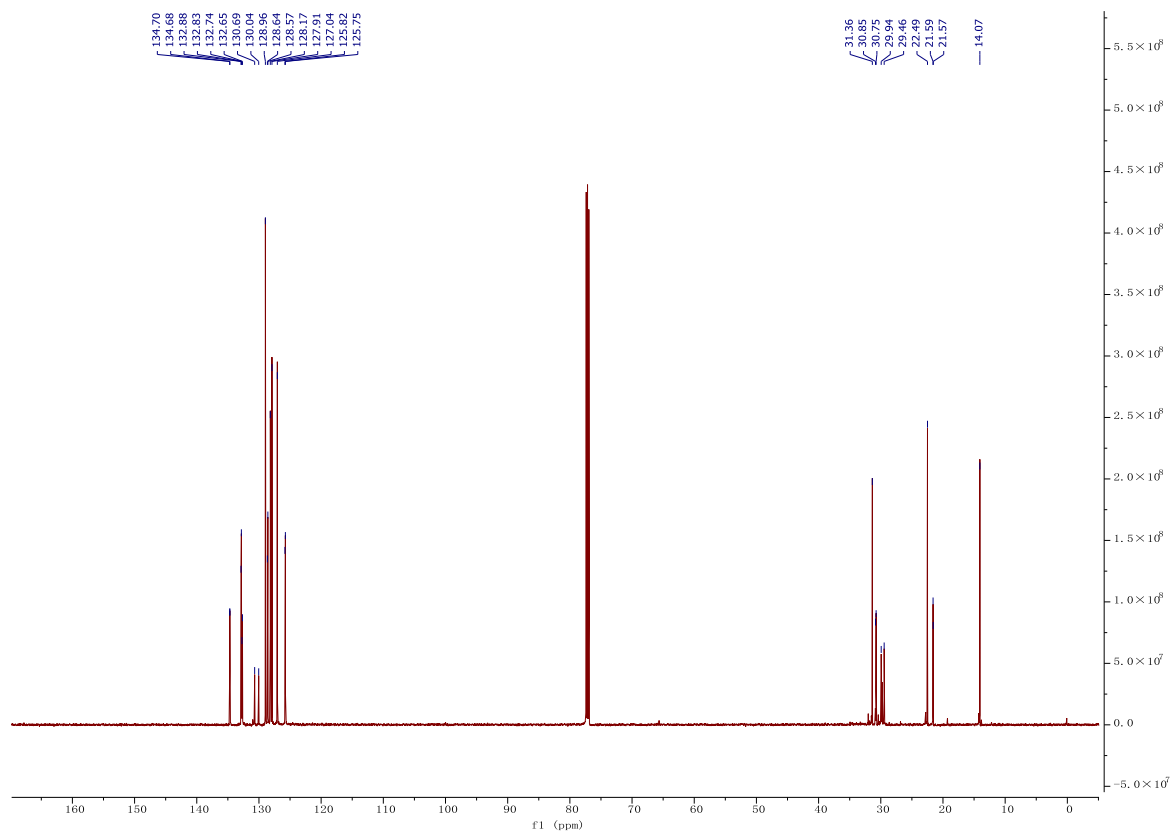

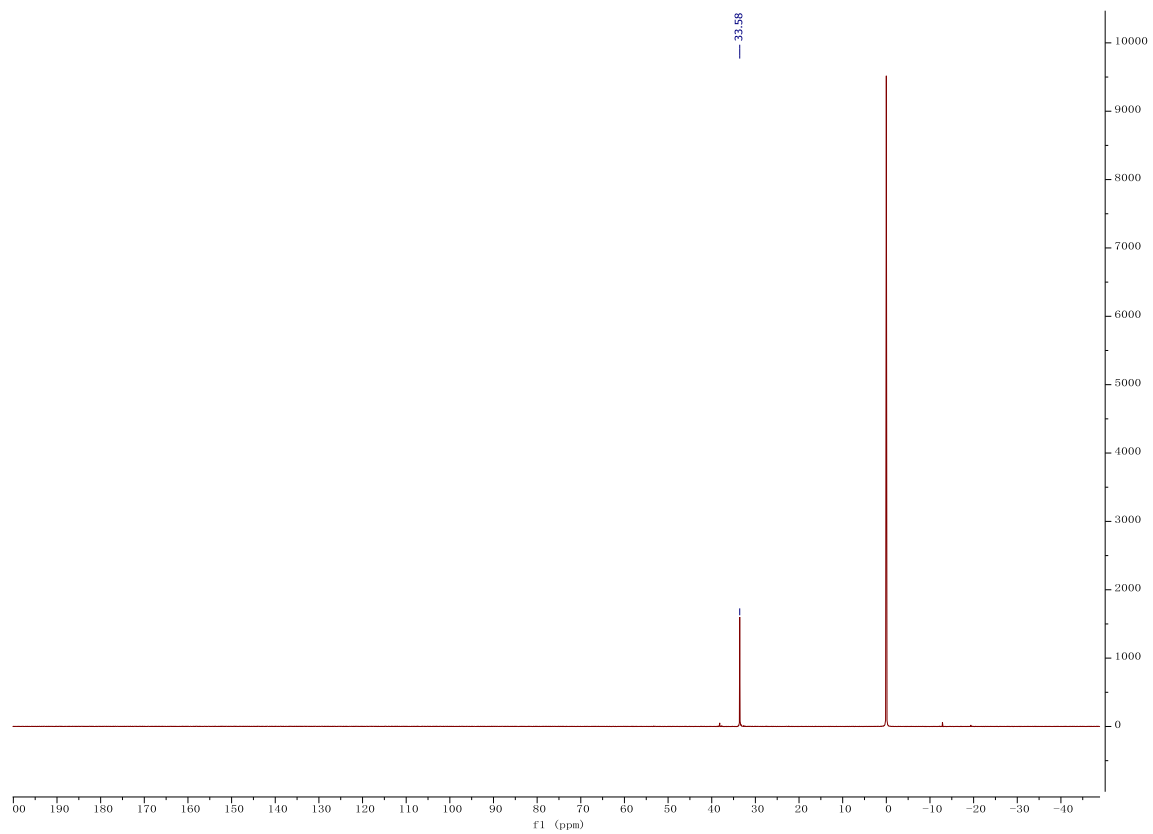

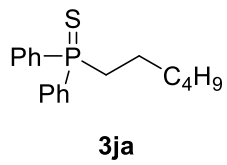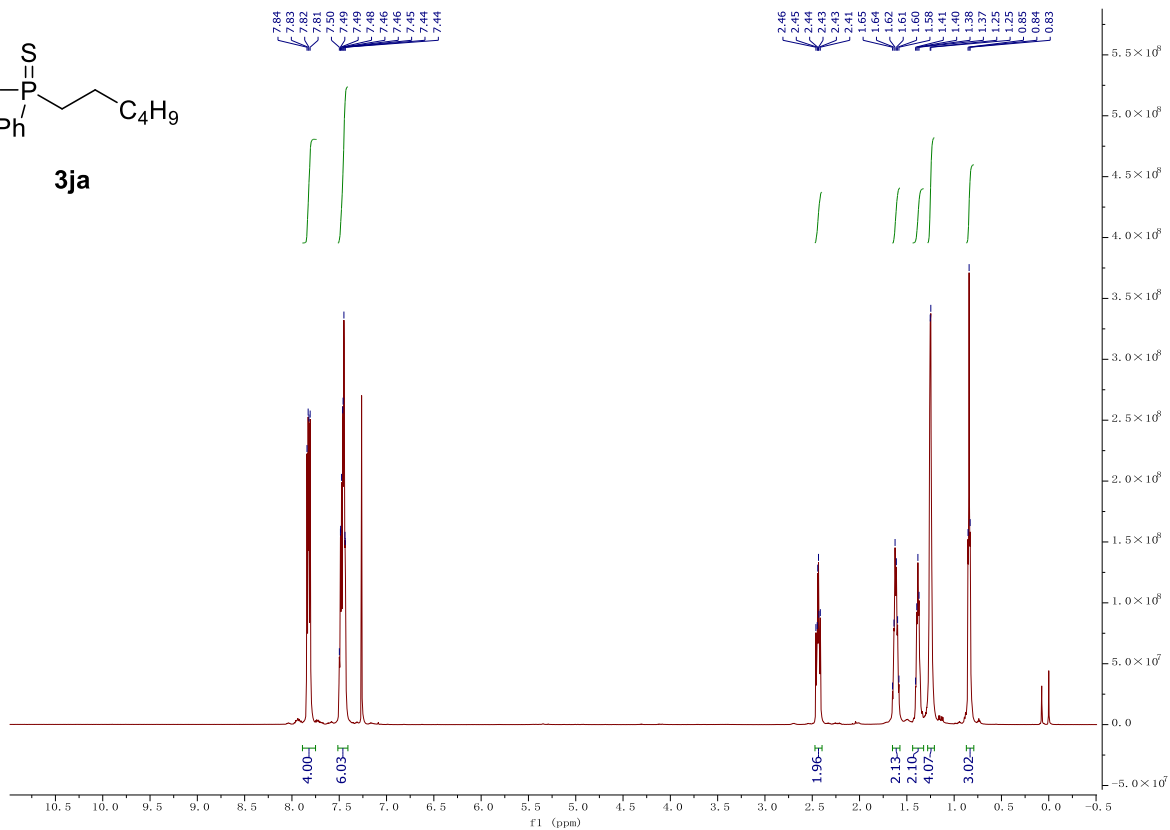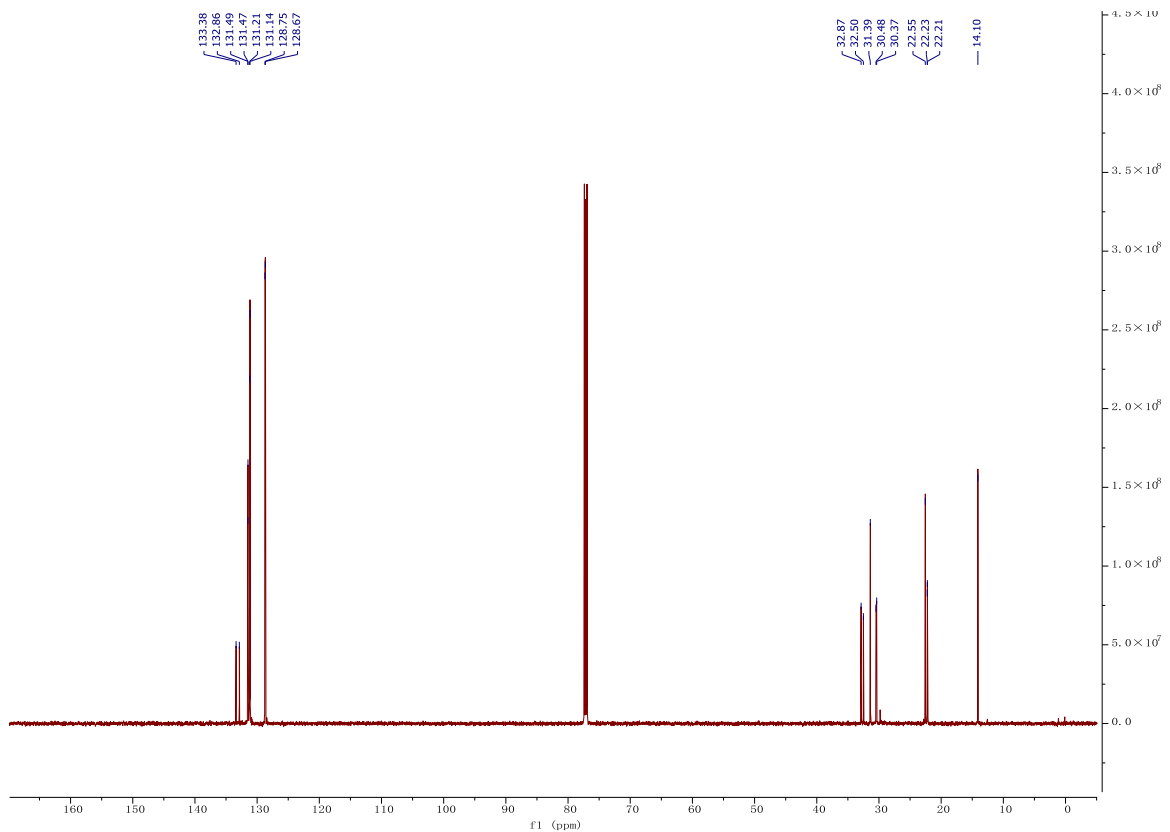

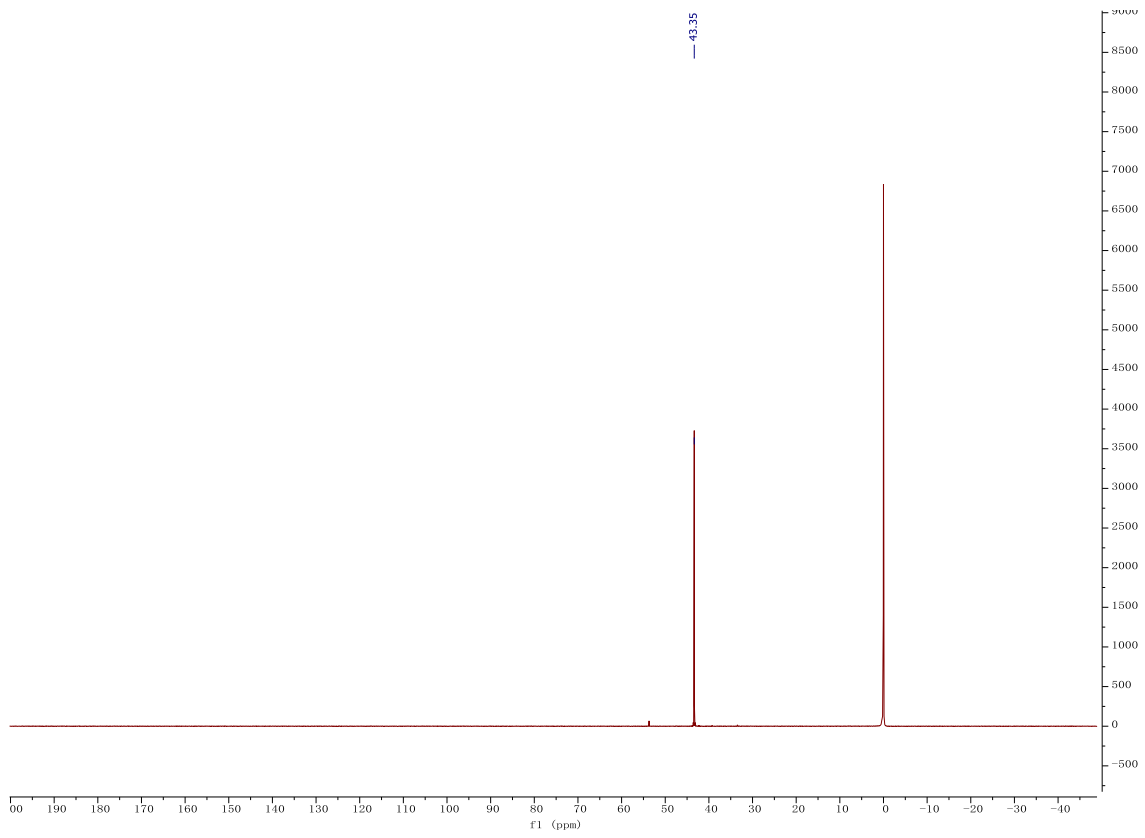



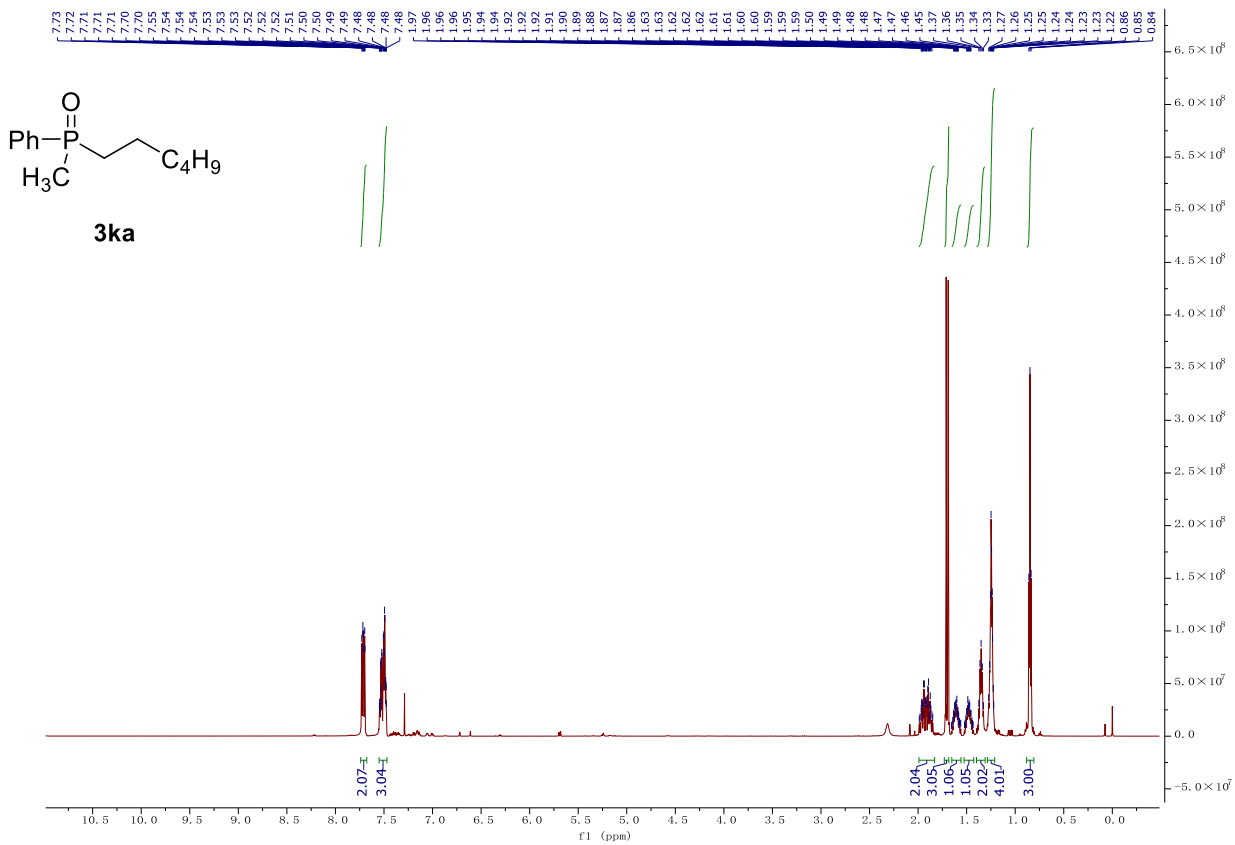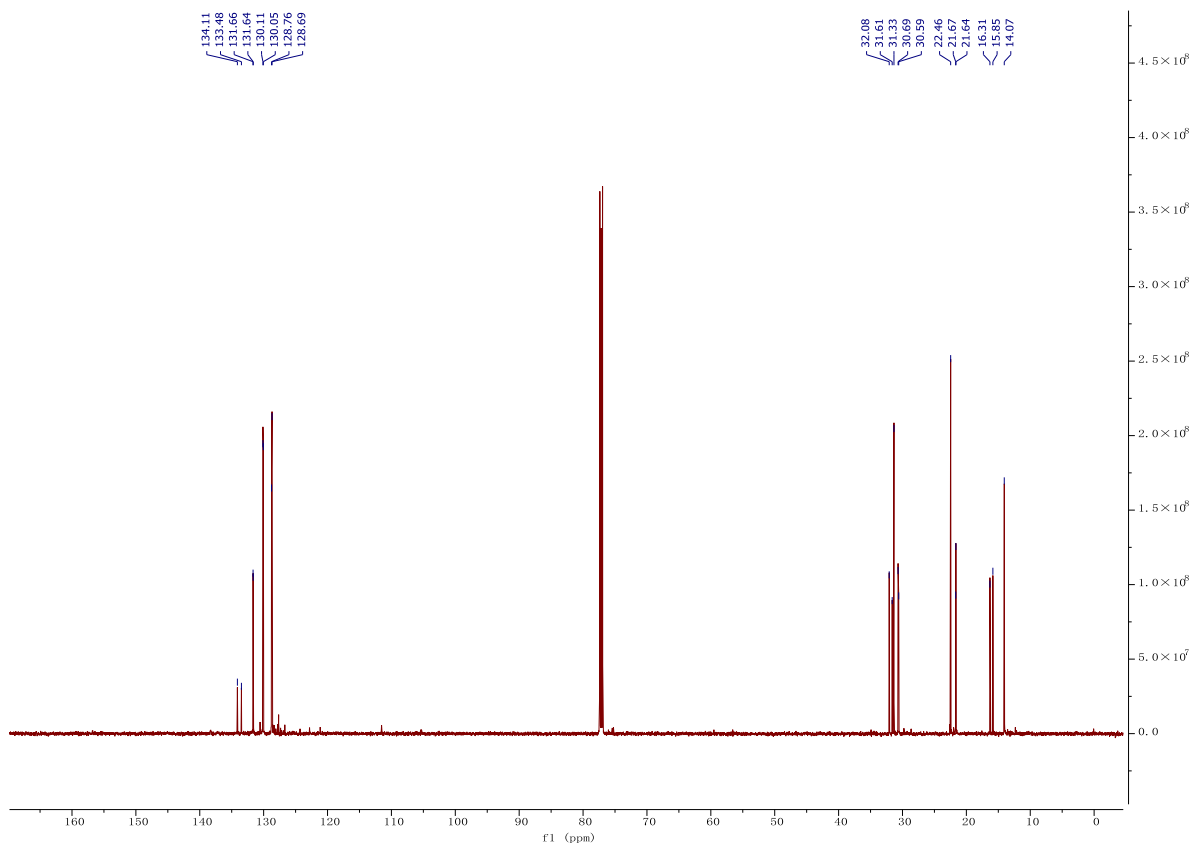

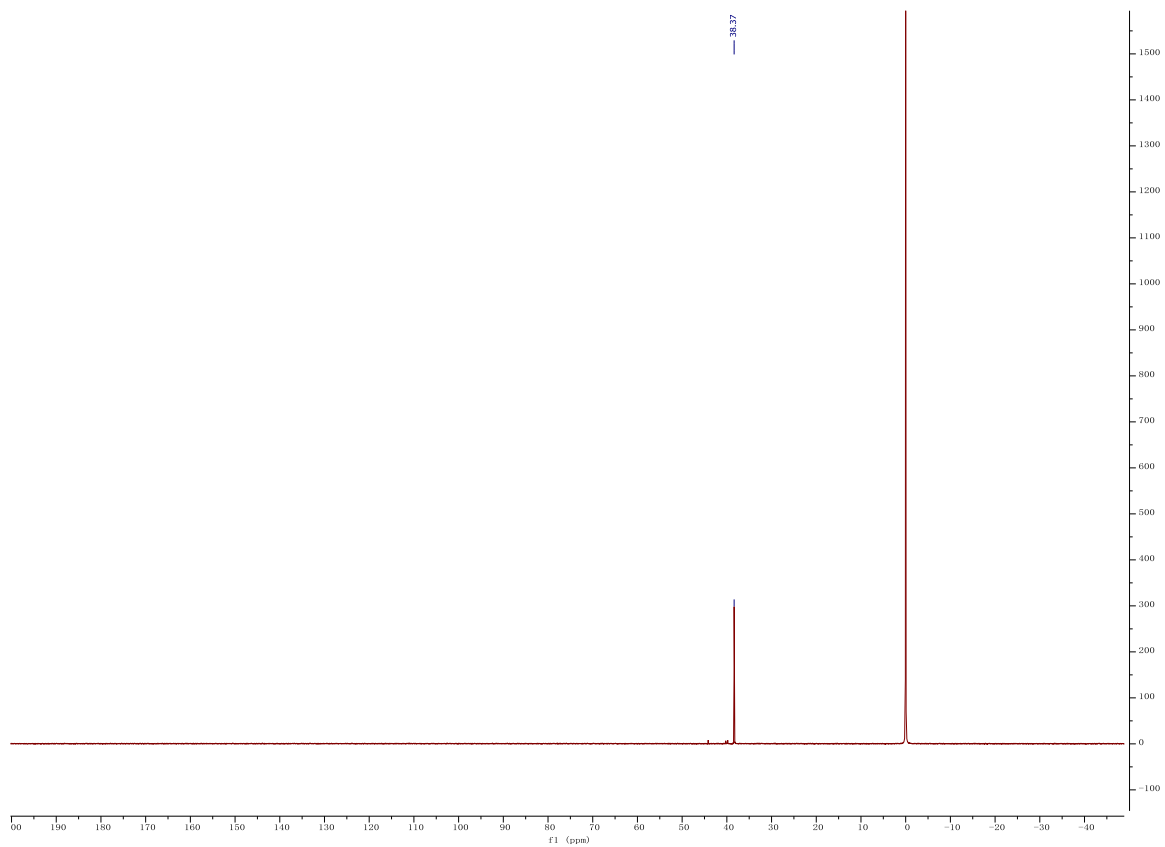

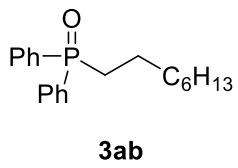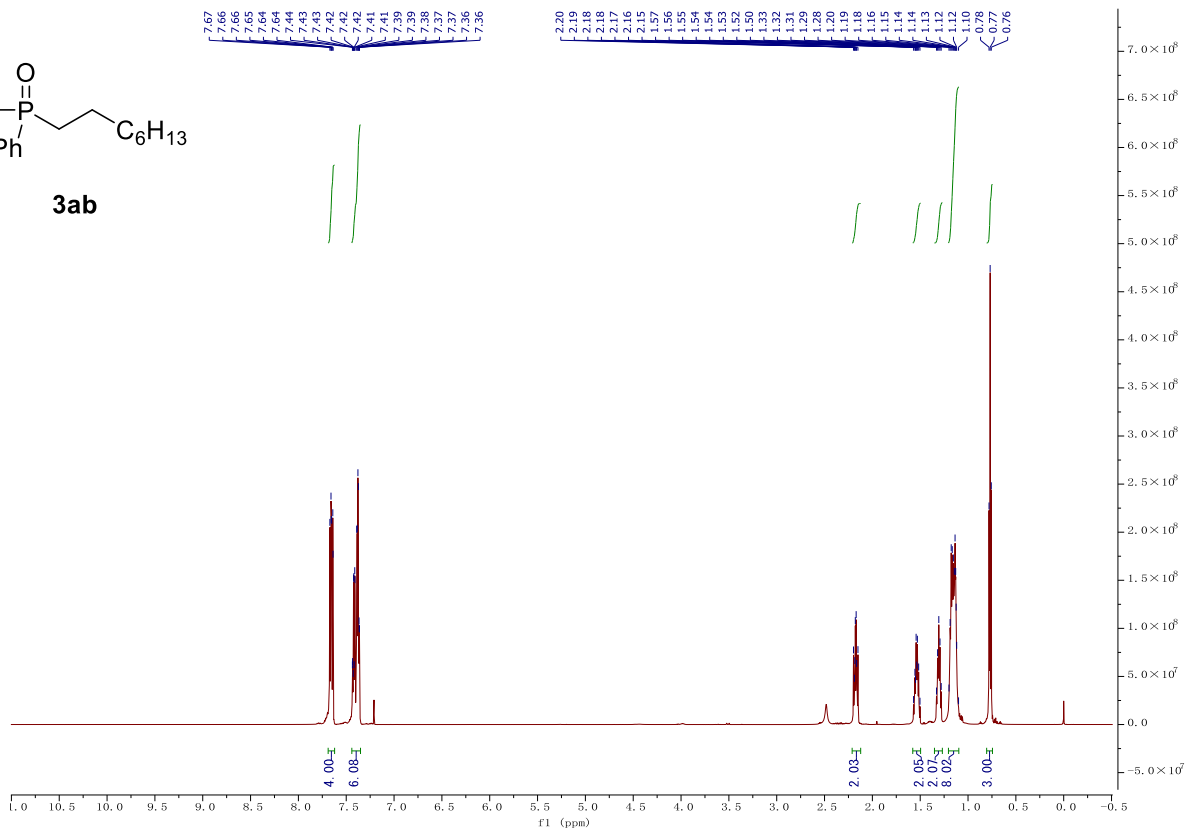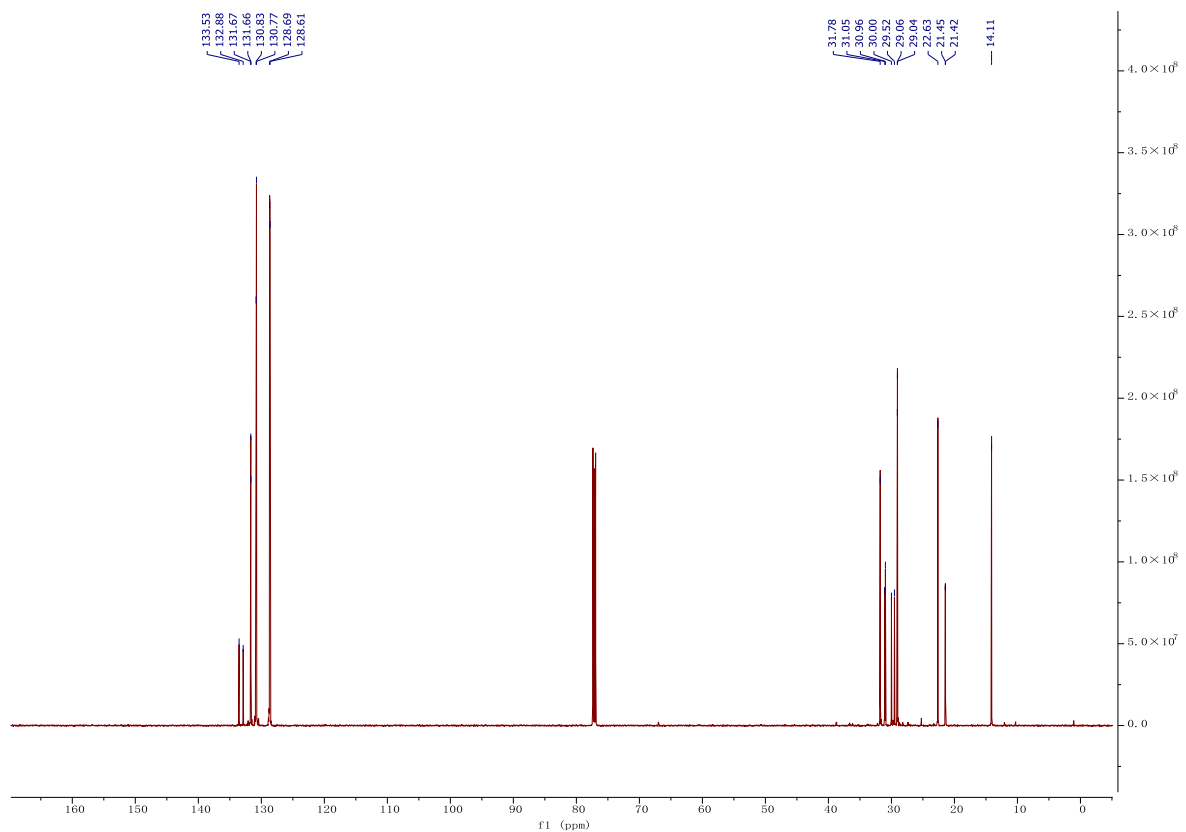

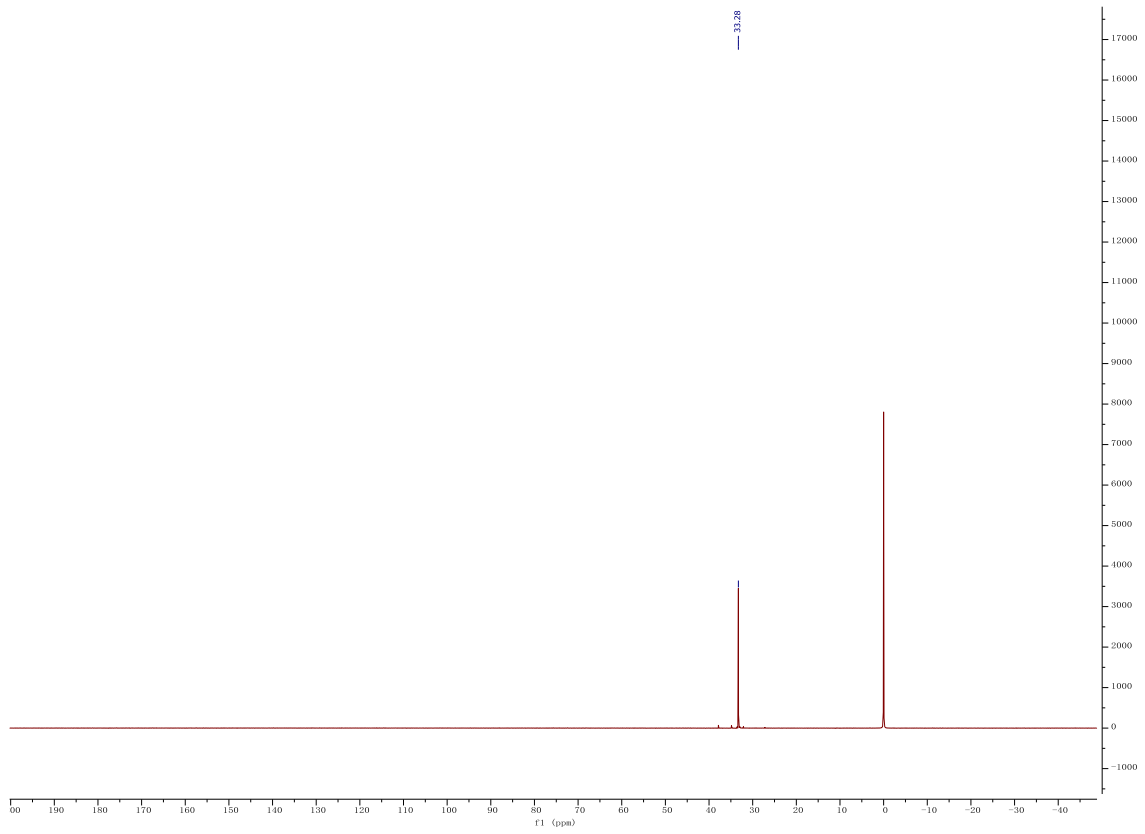

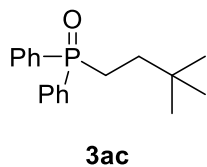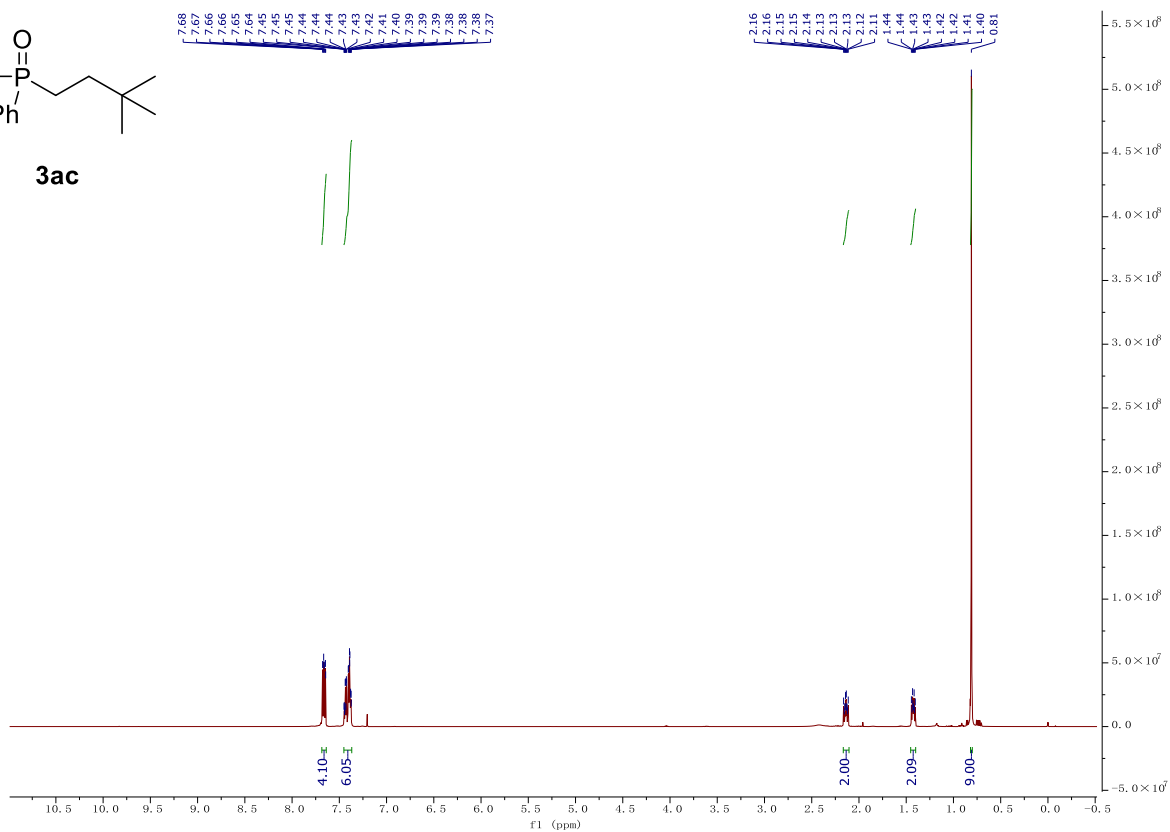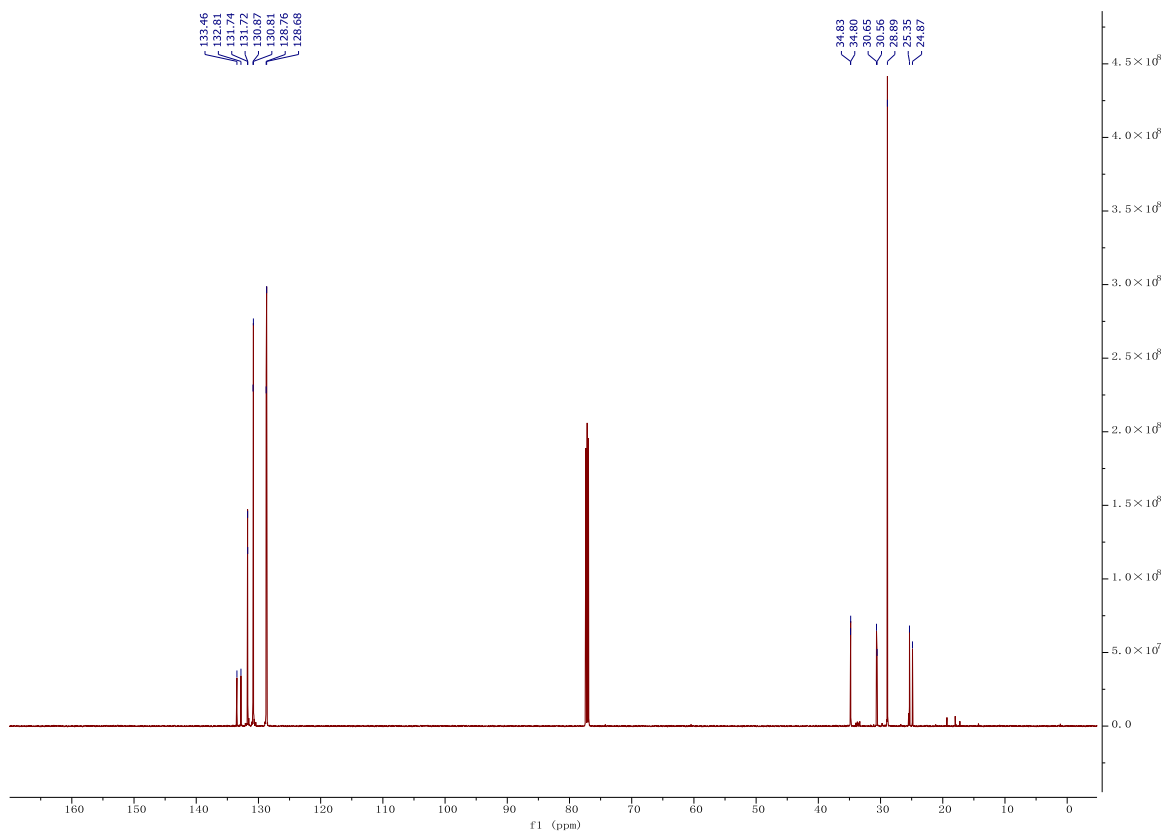

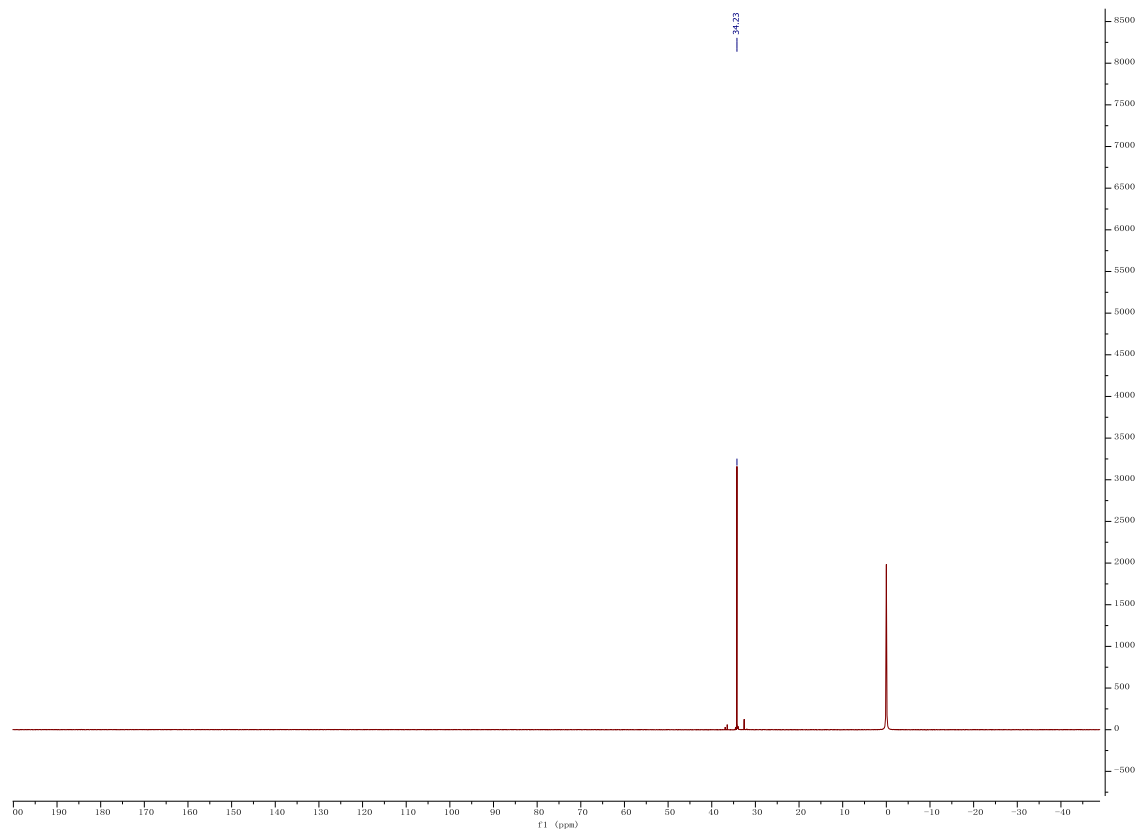

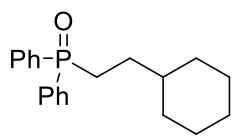

3ad

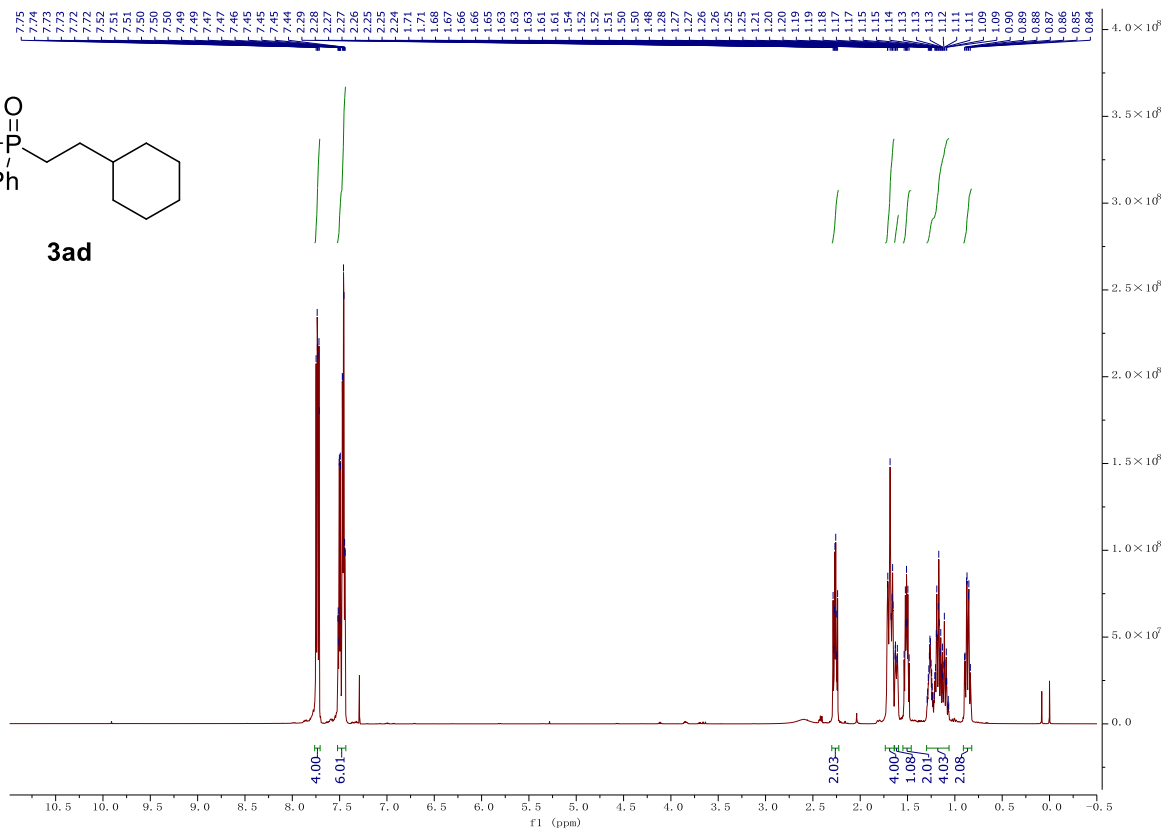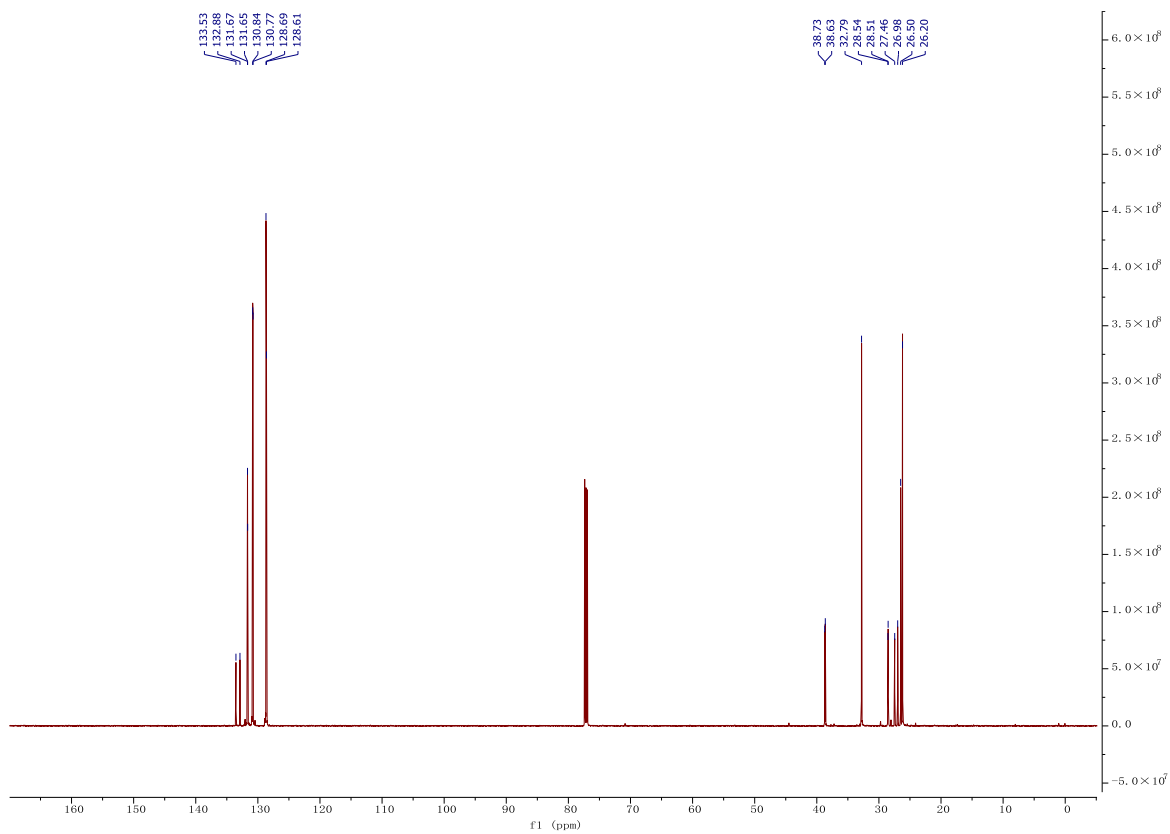

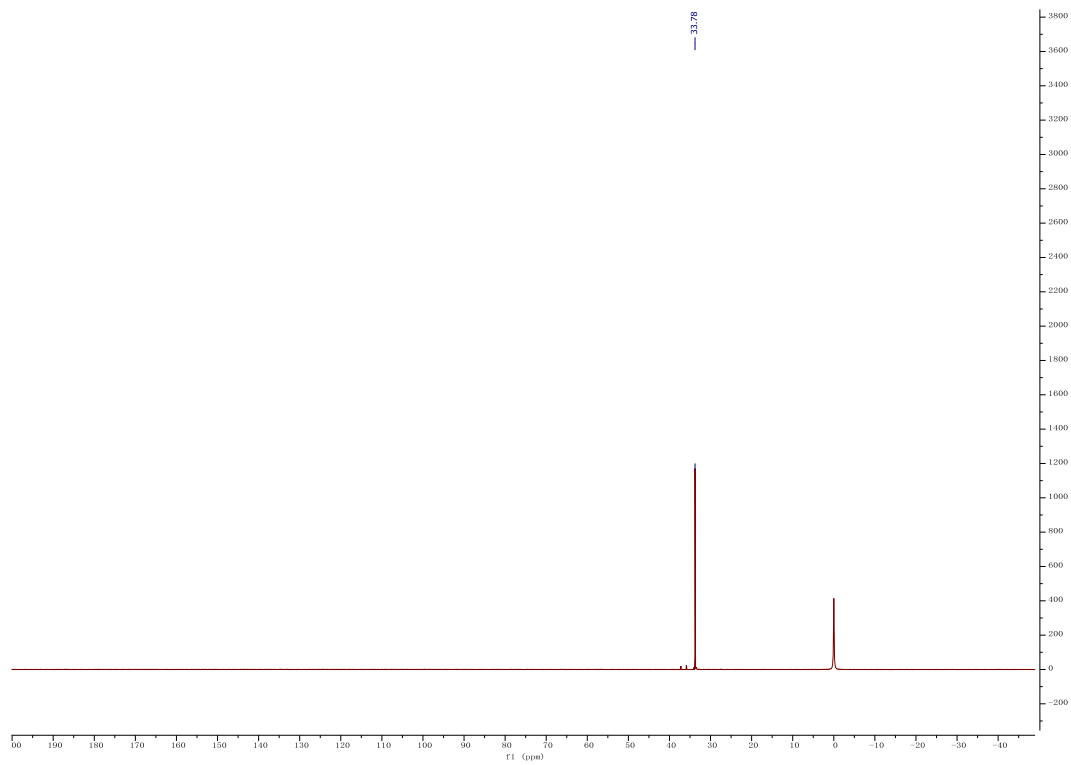



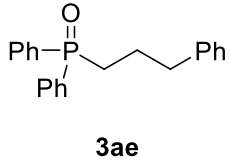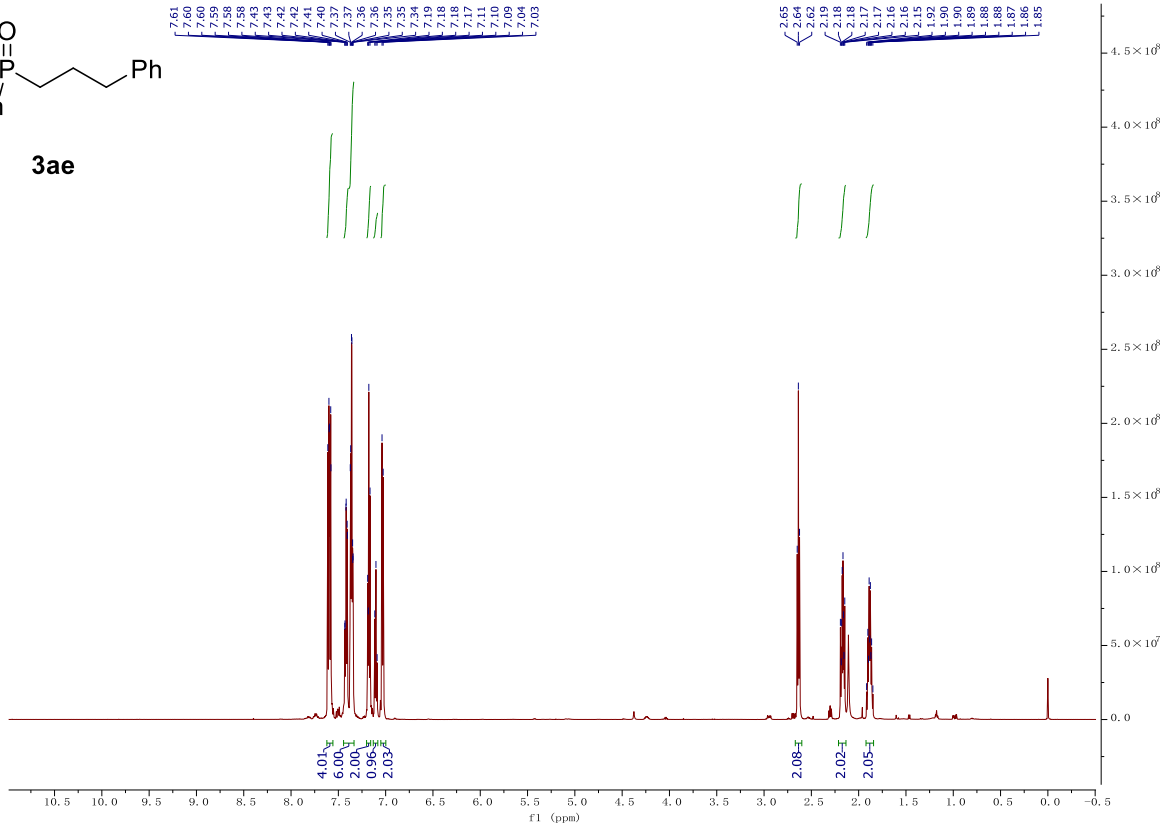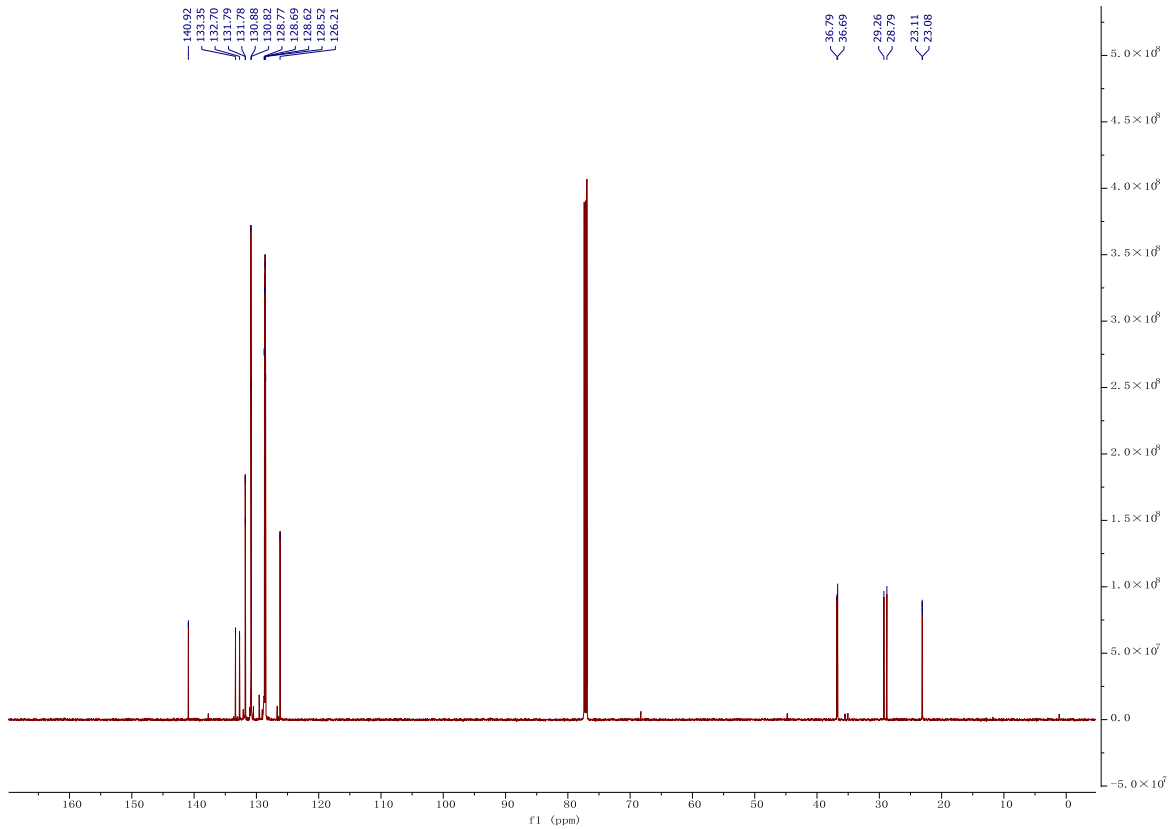

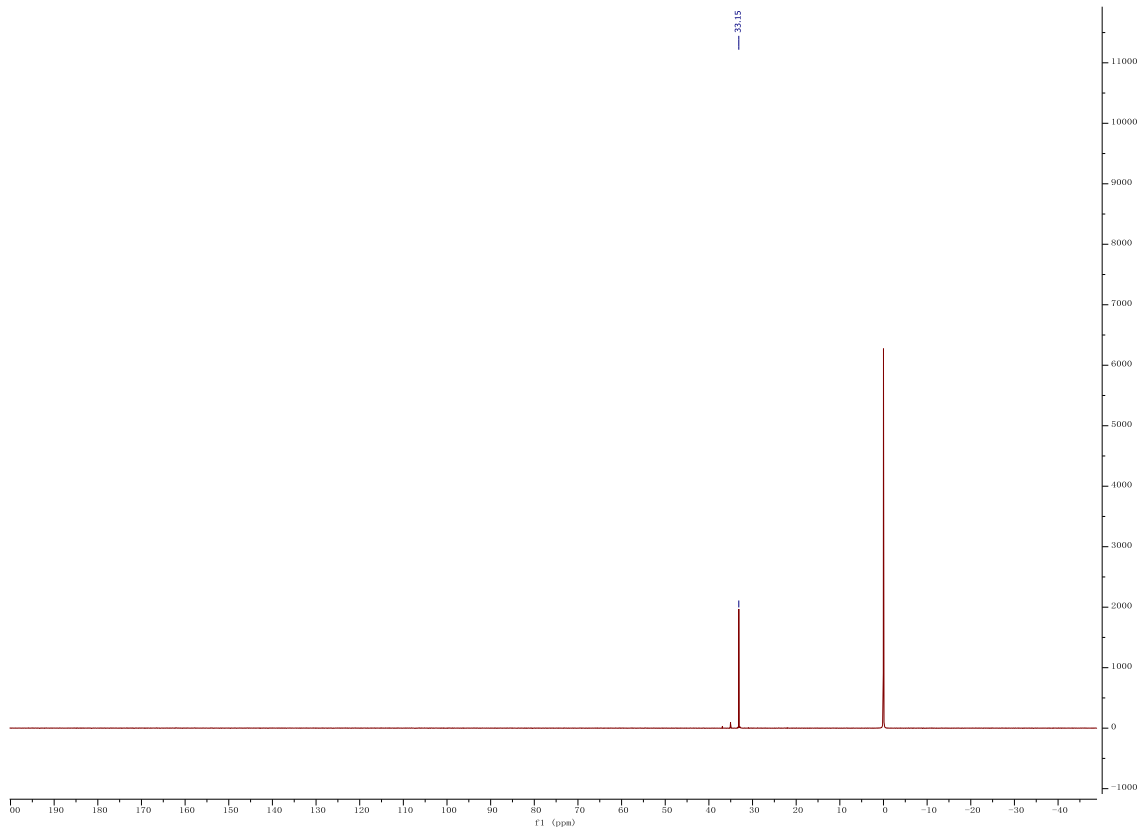

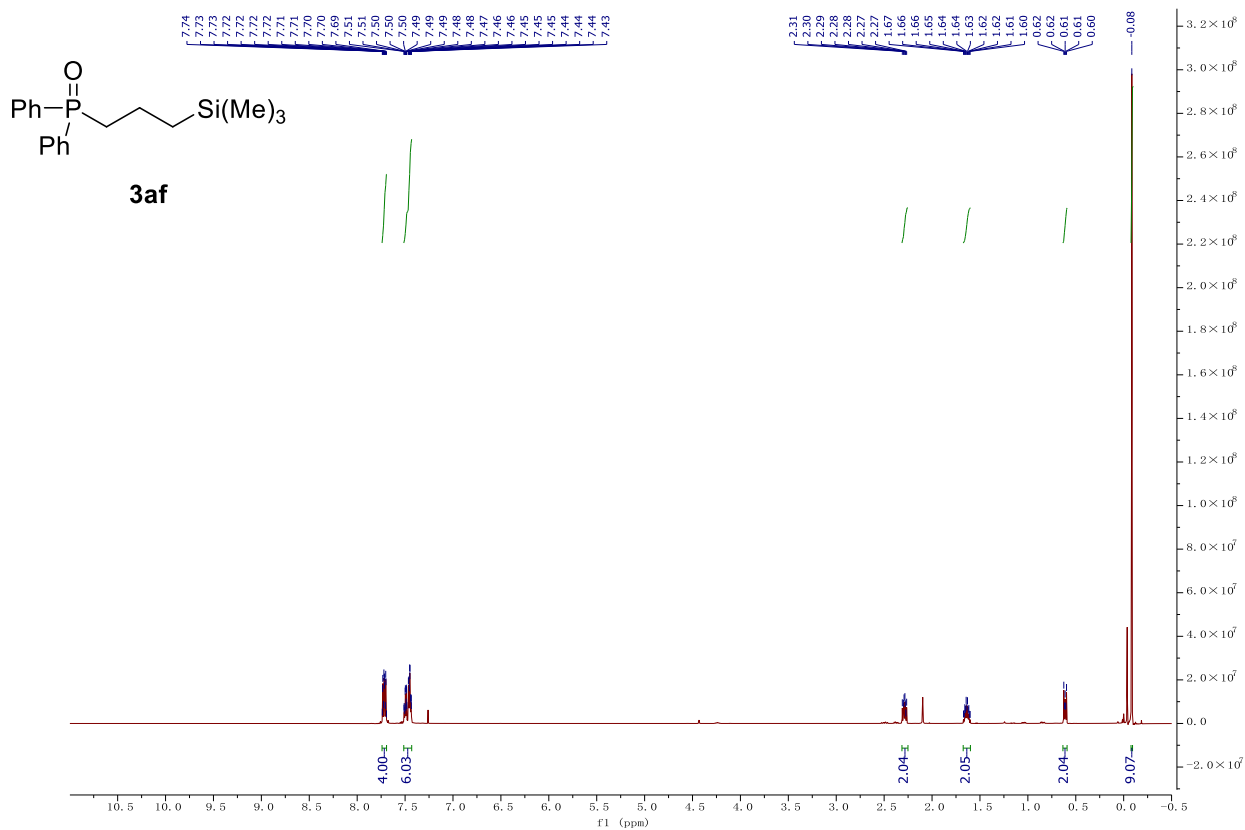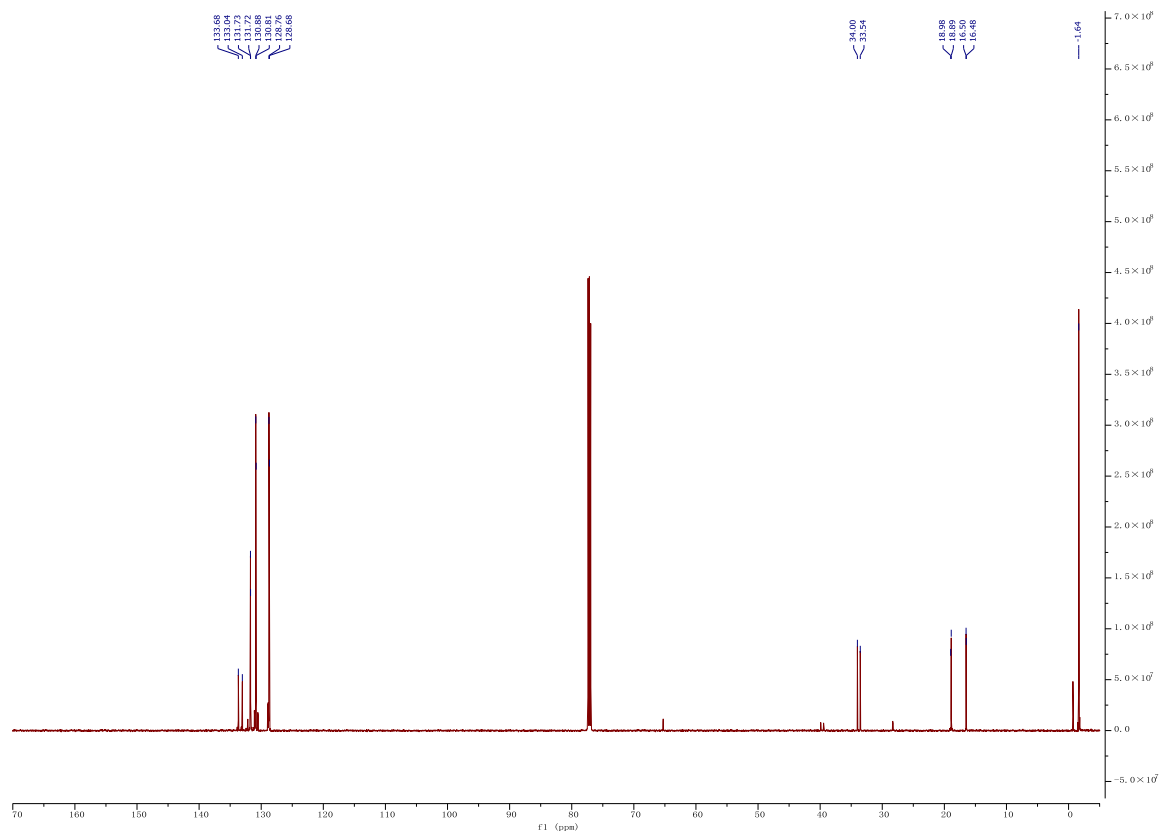

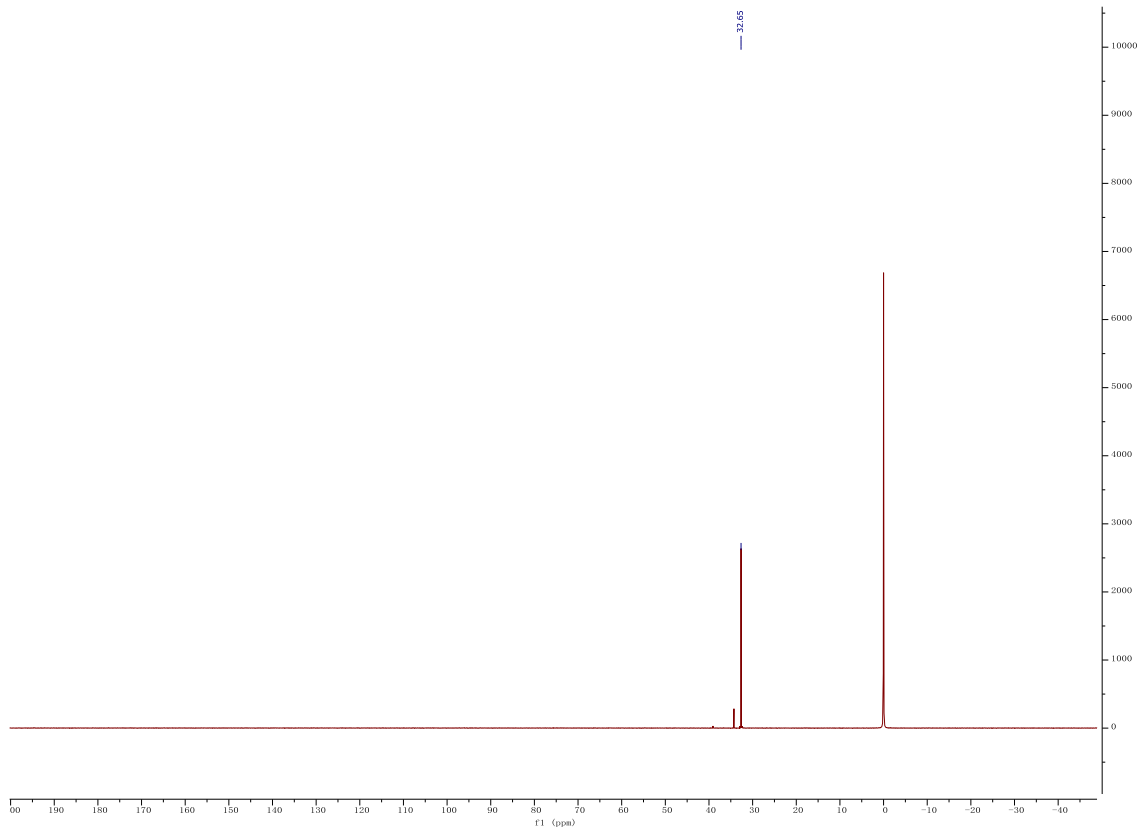

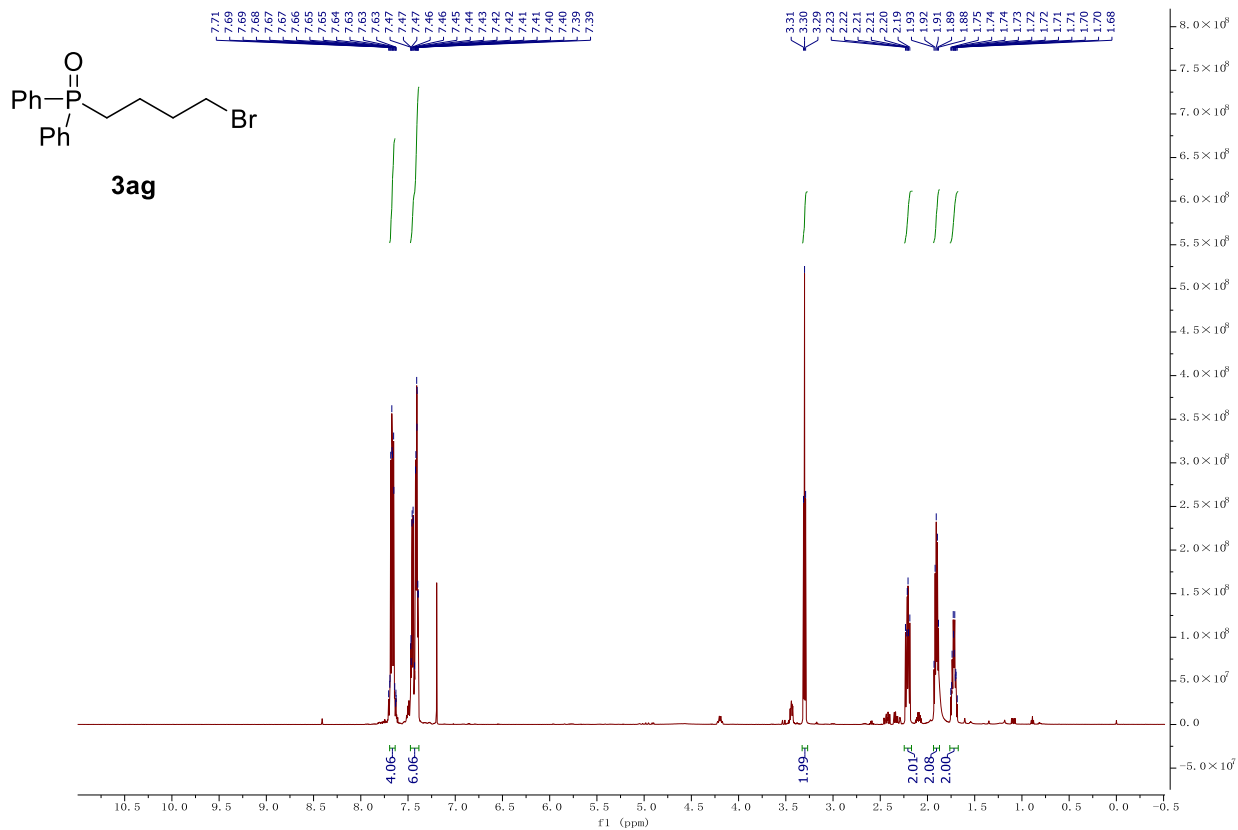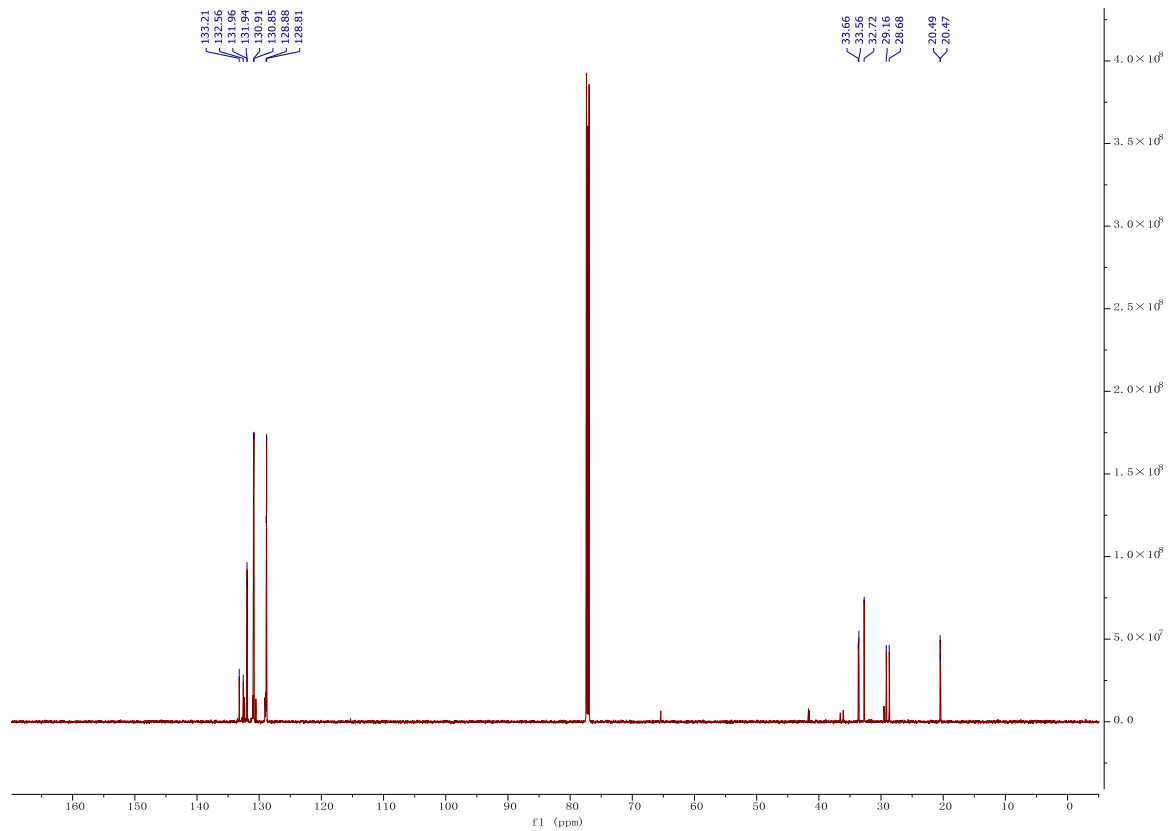

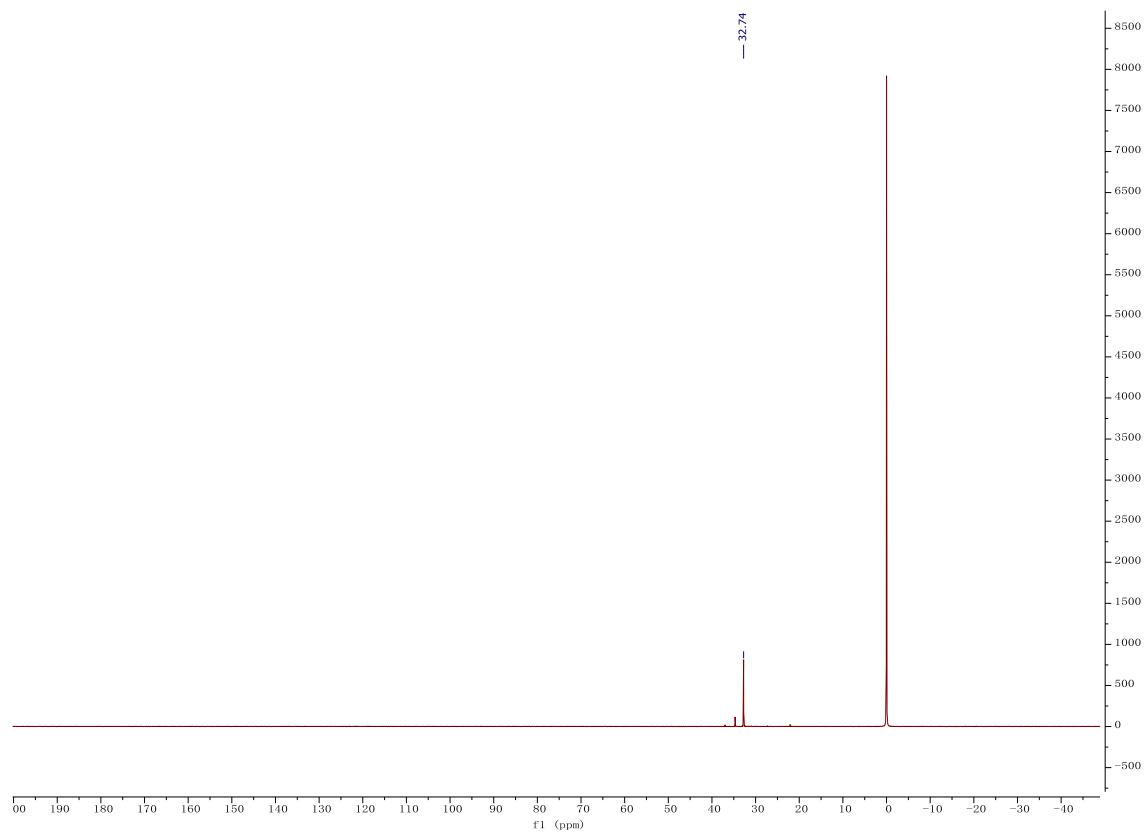

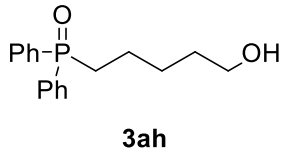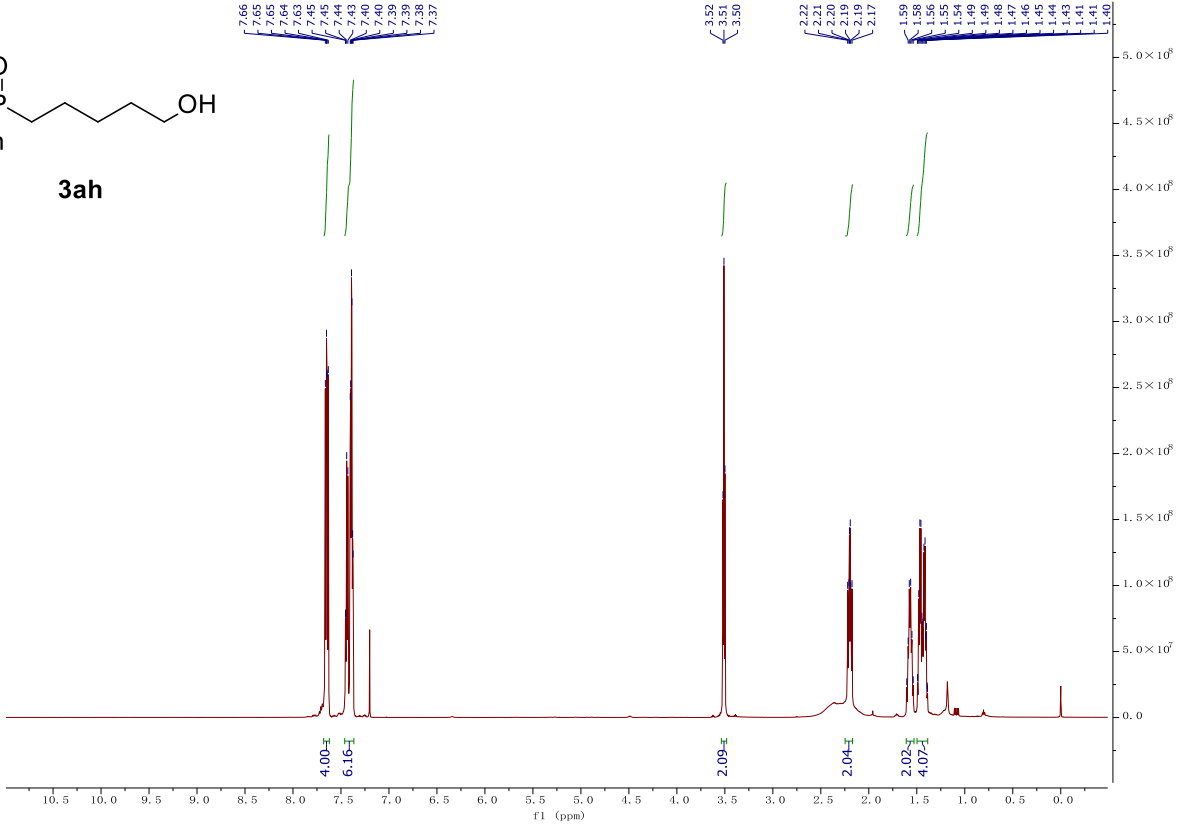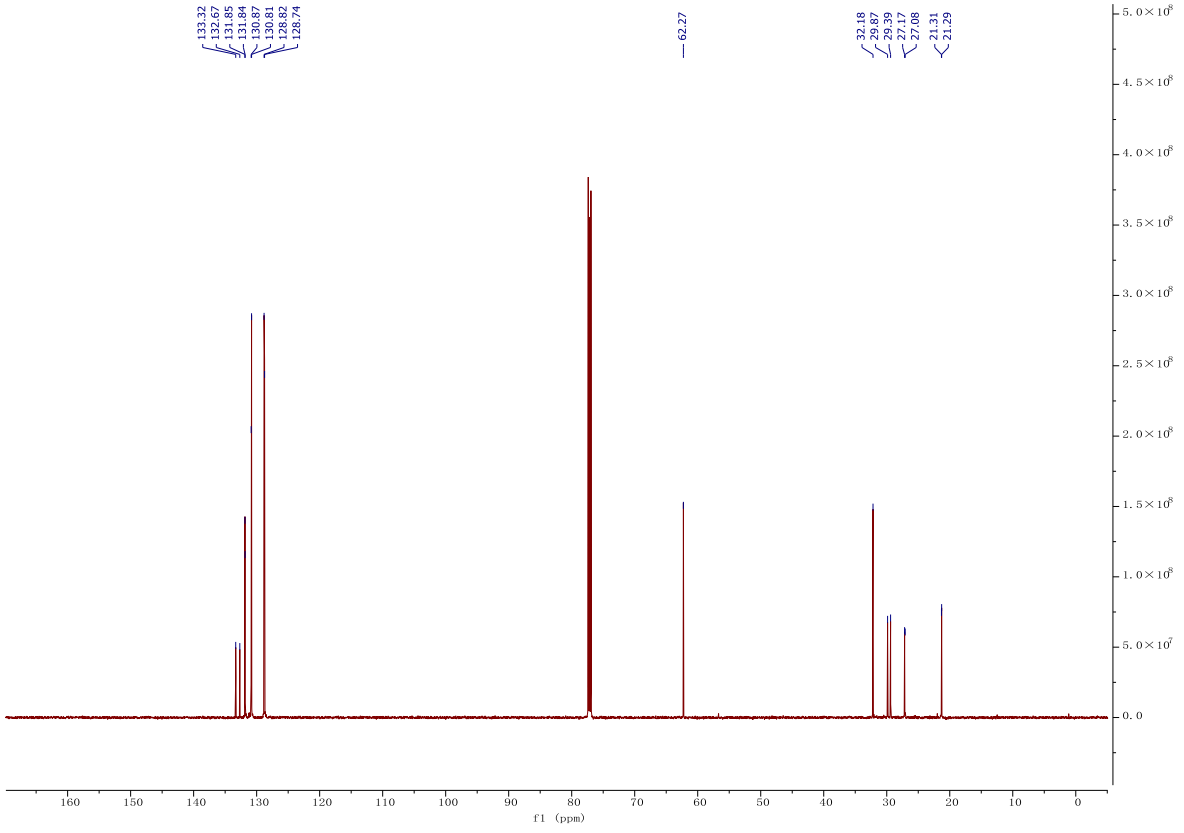

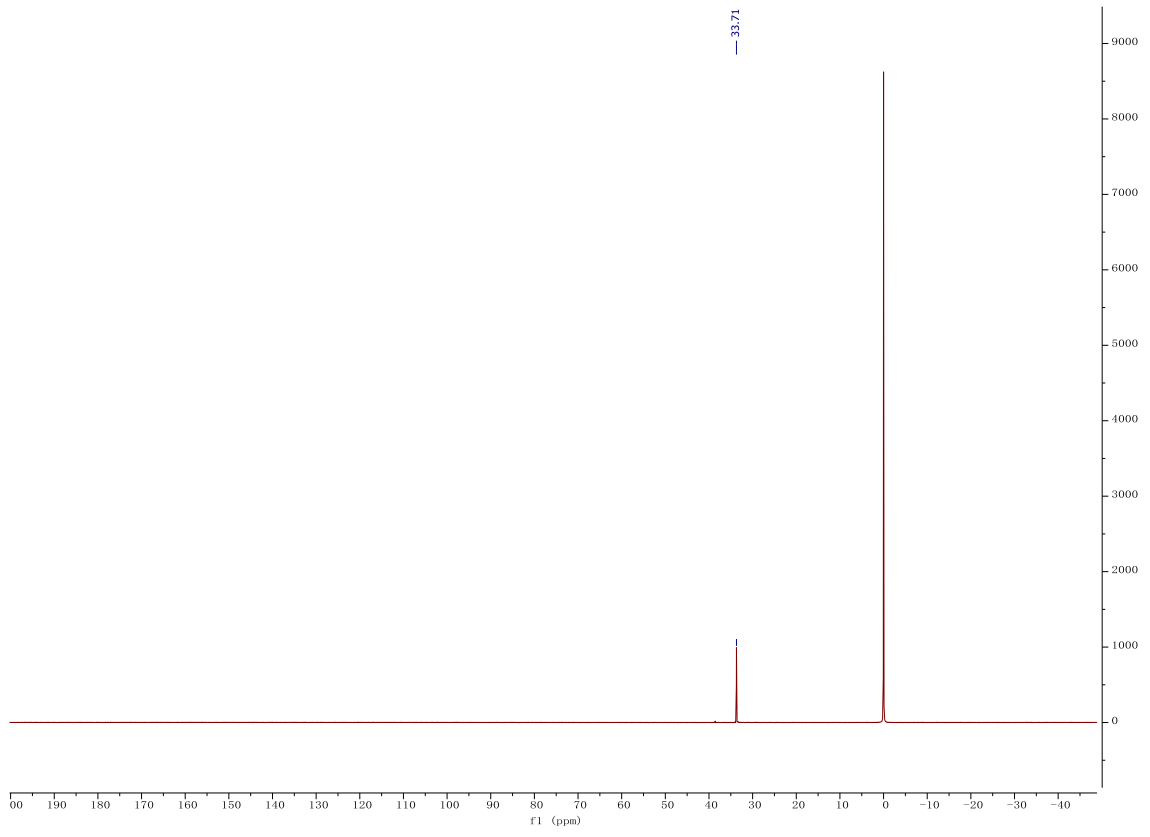



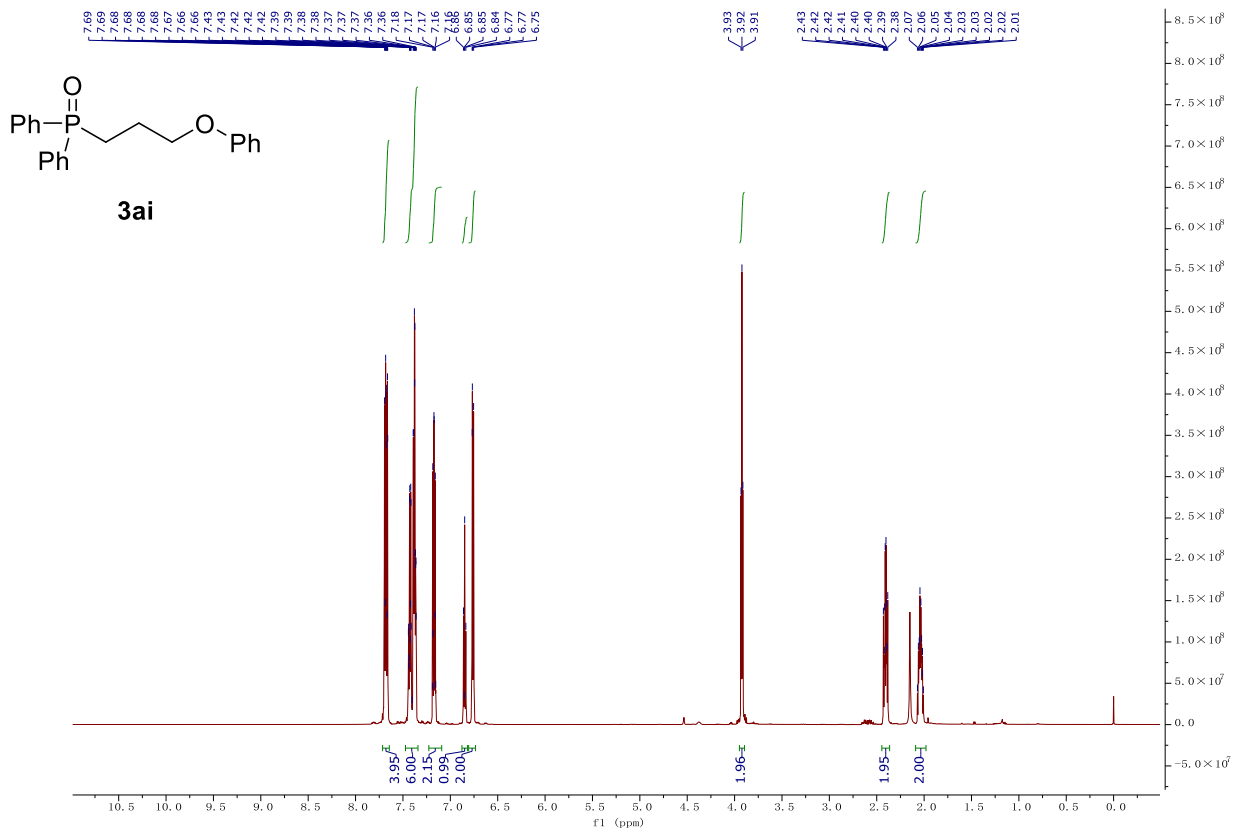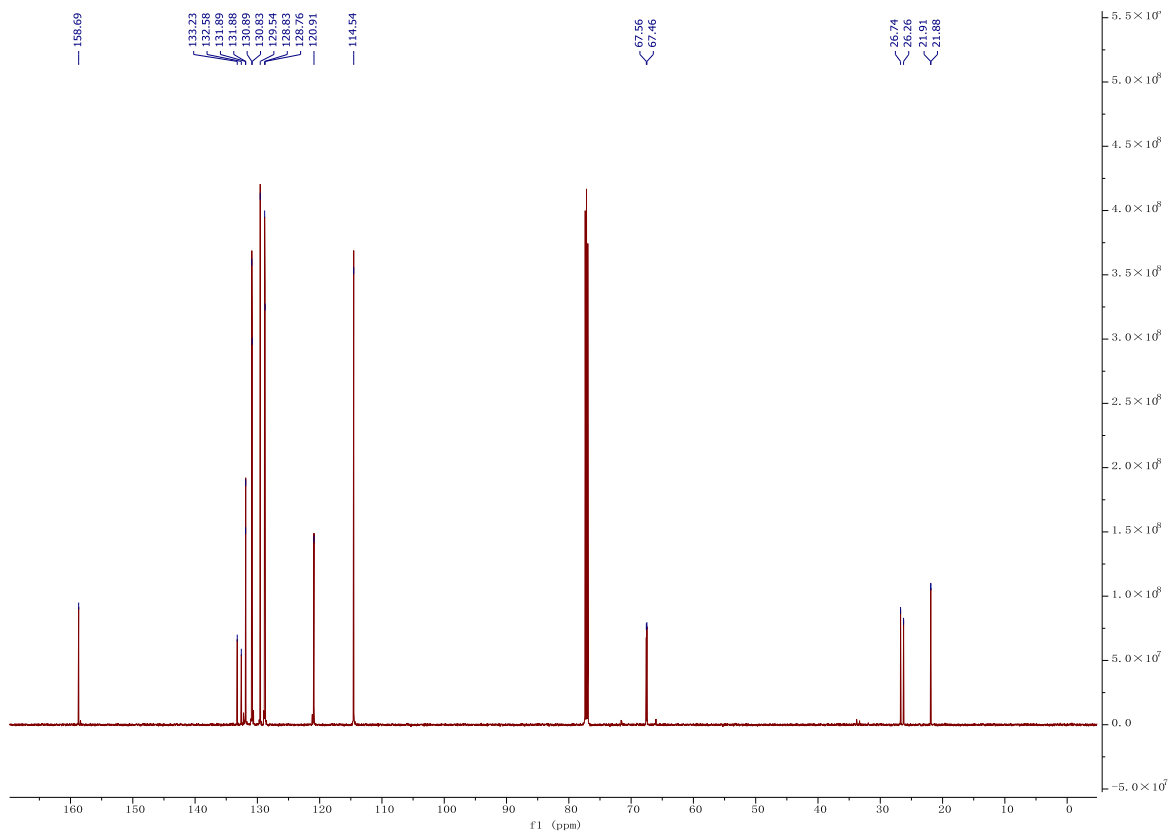

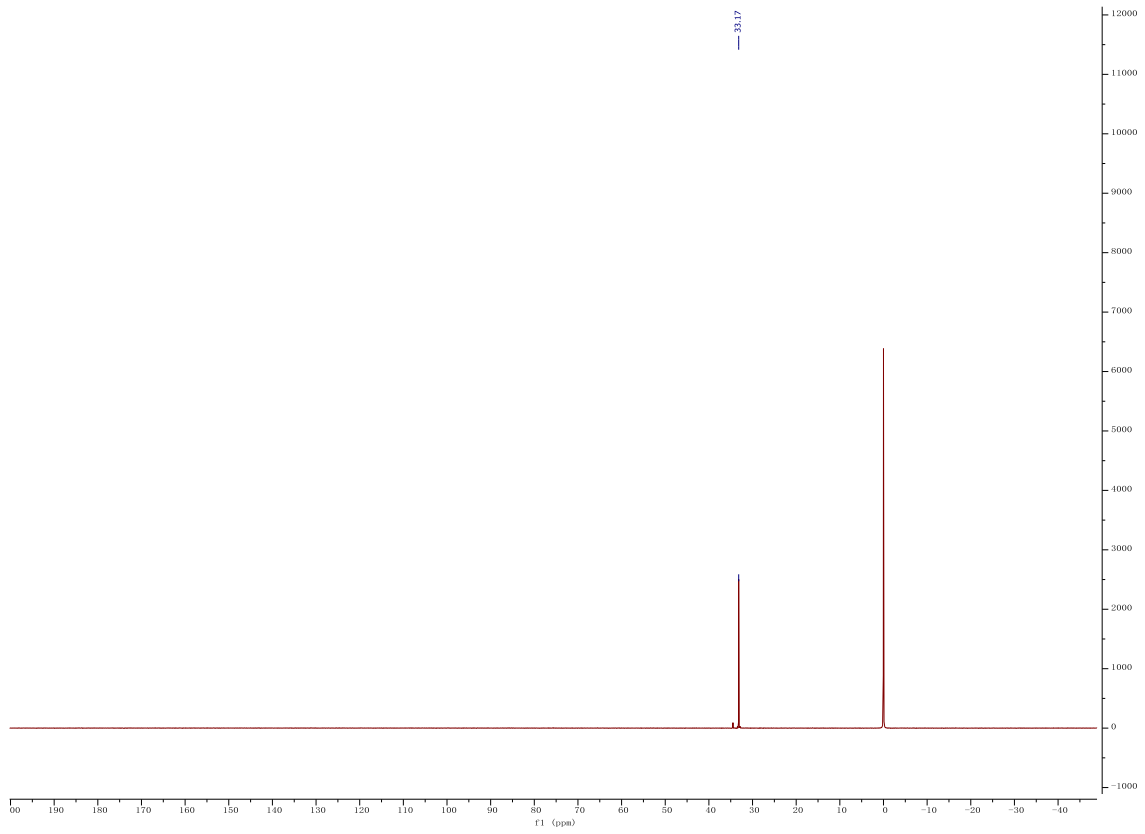

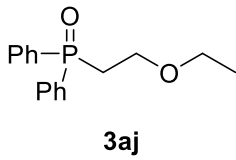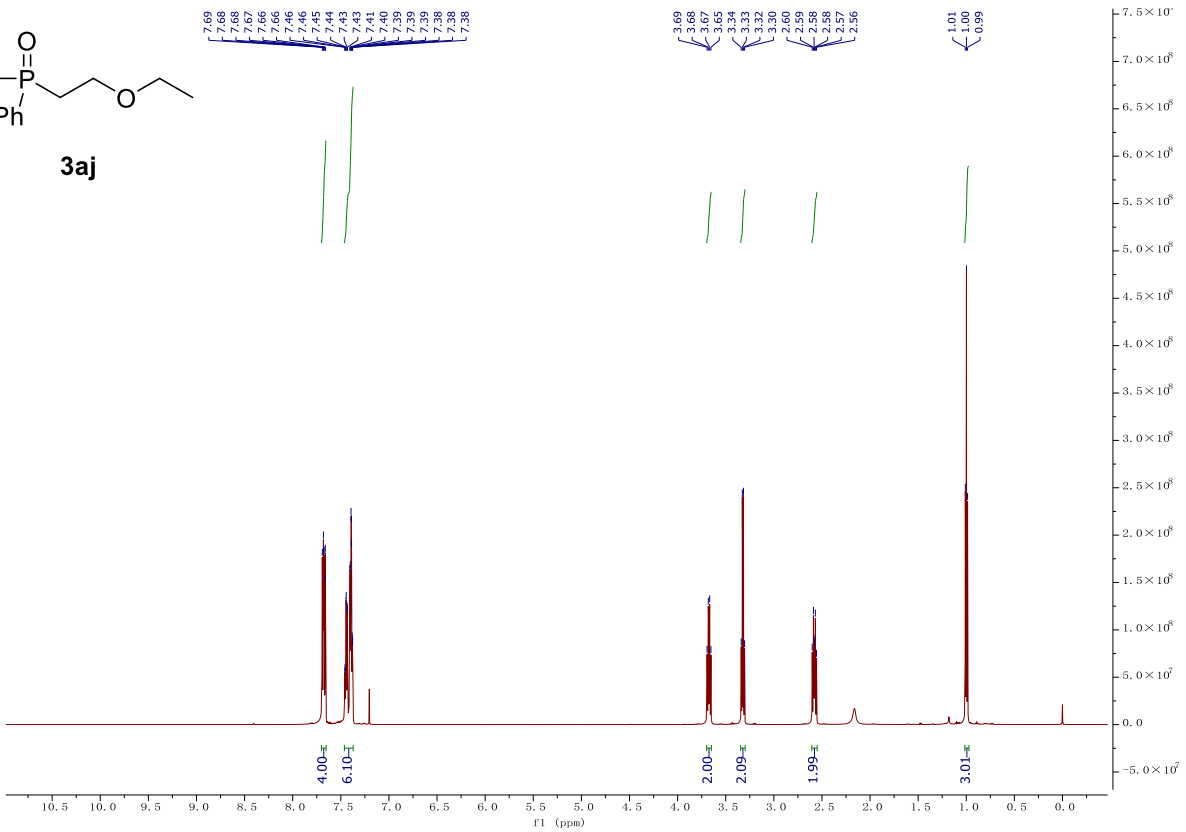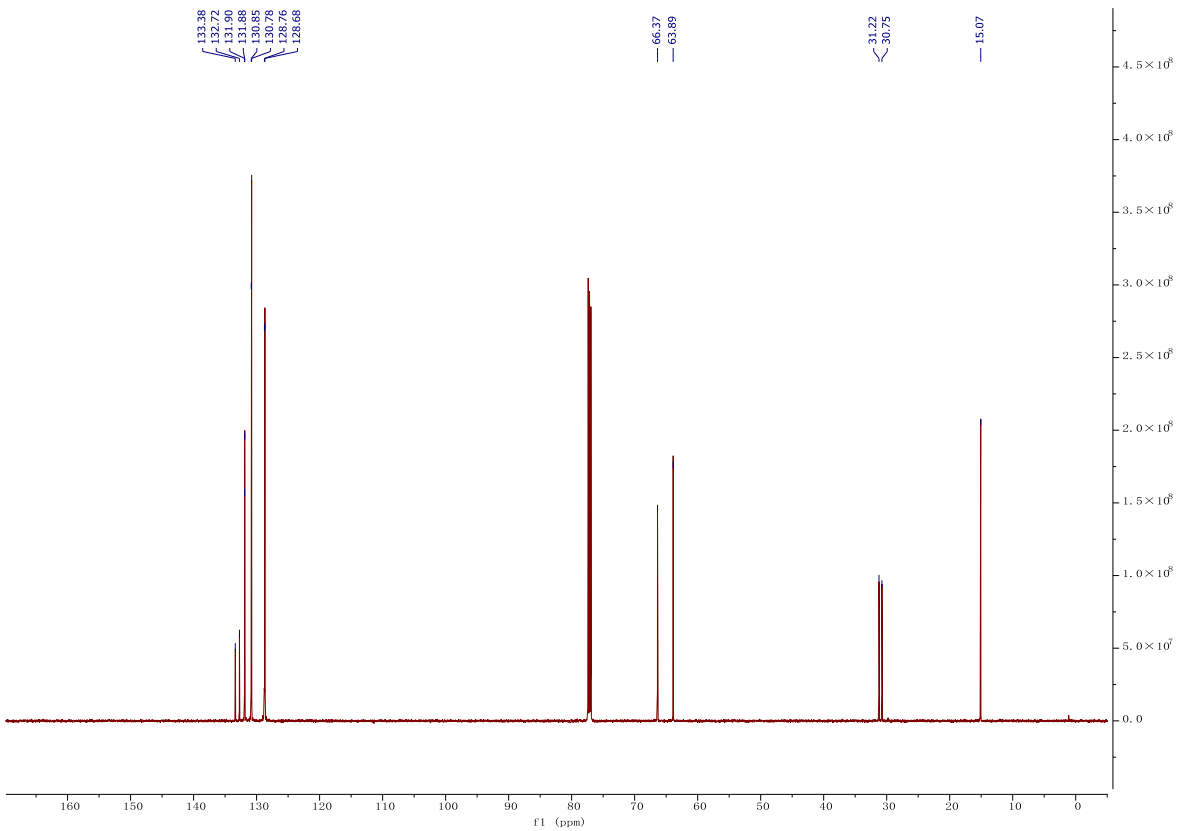

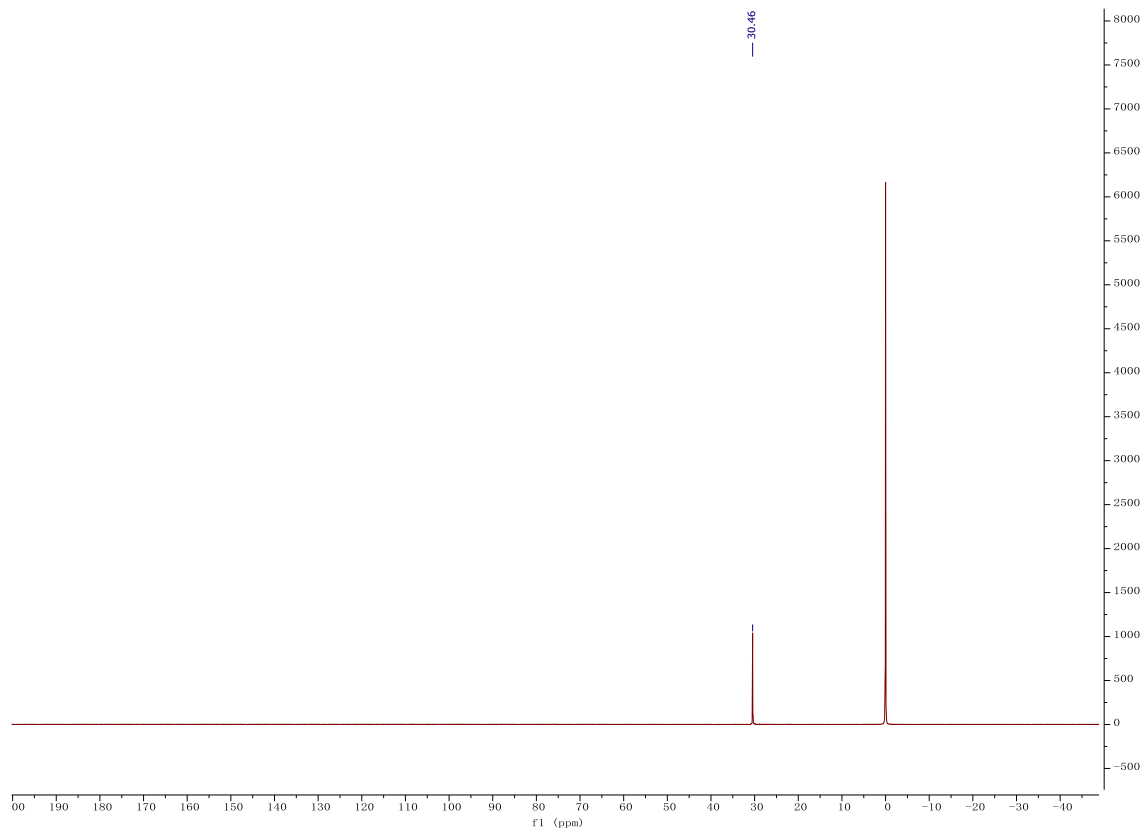

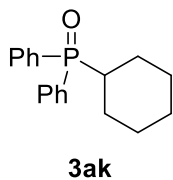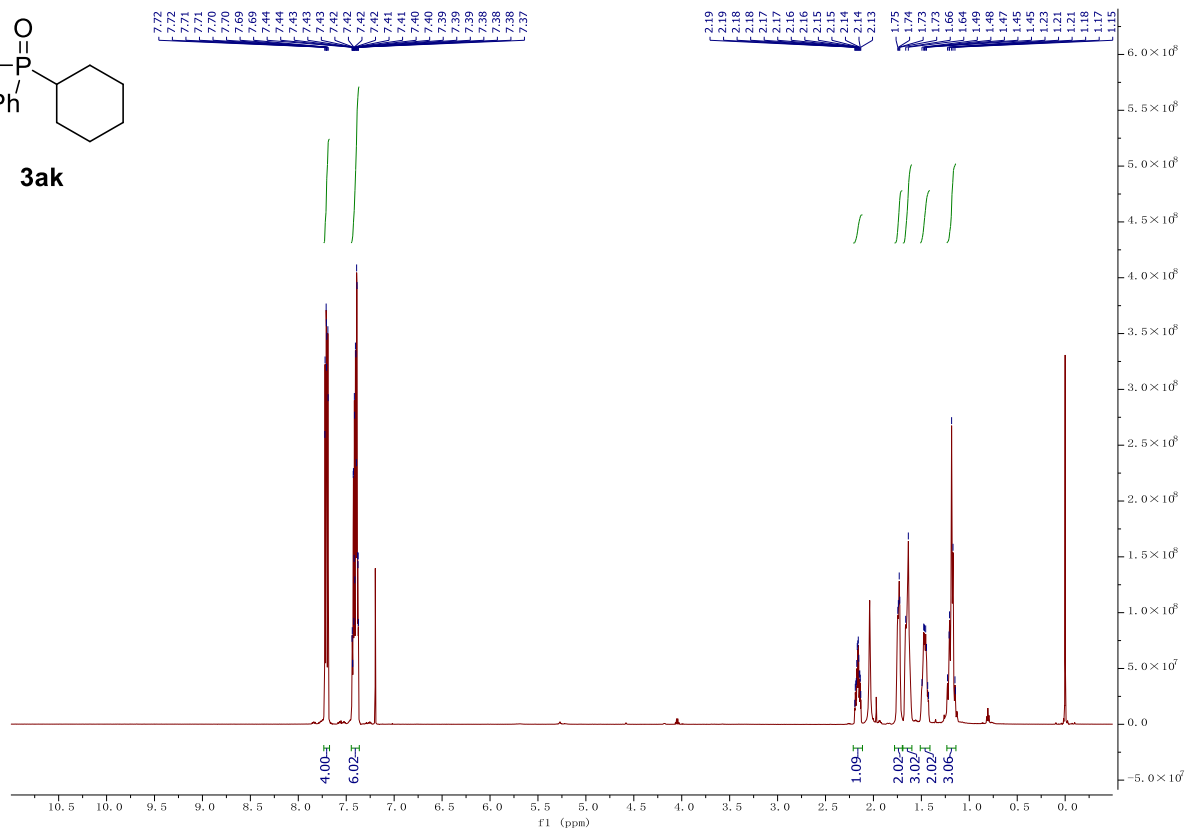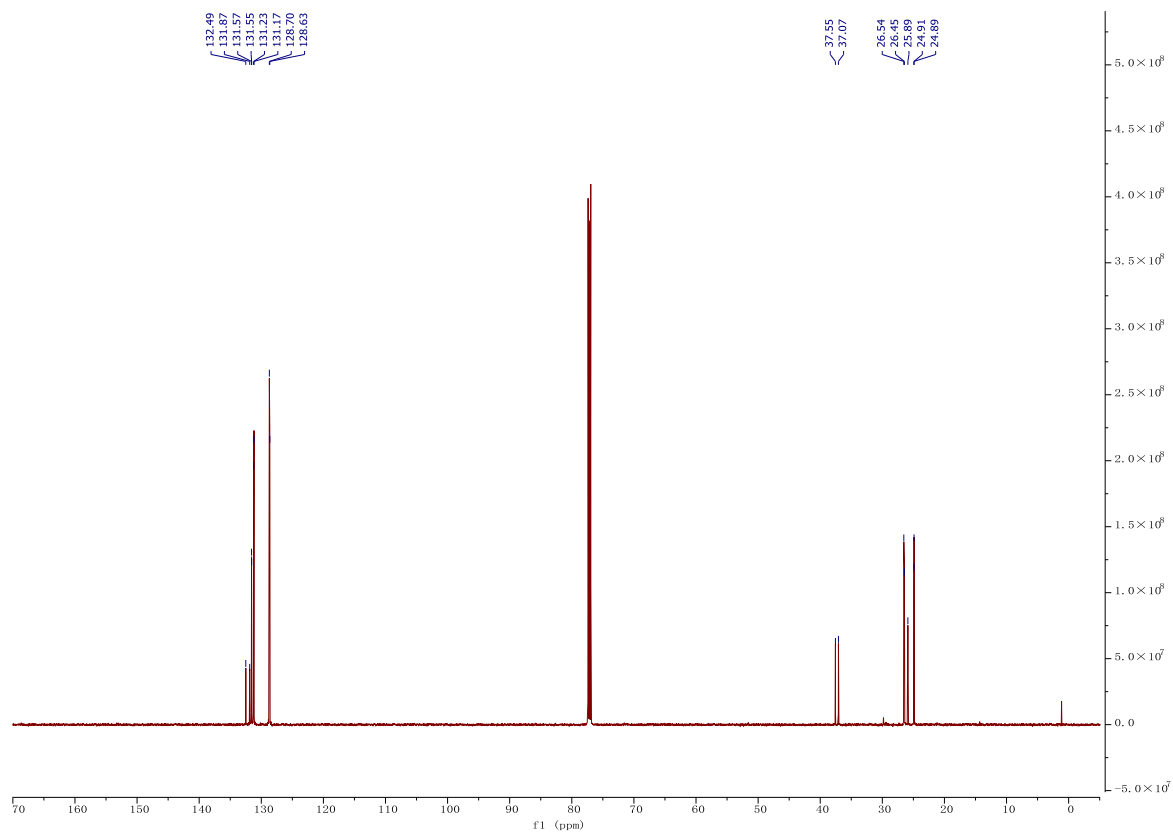

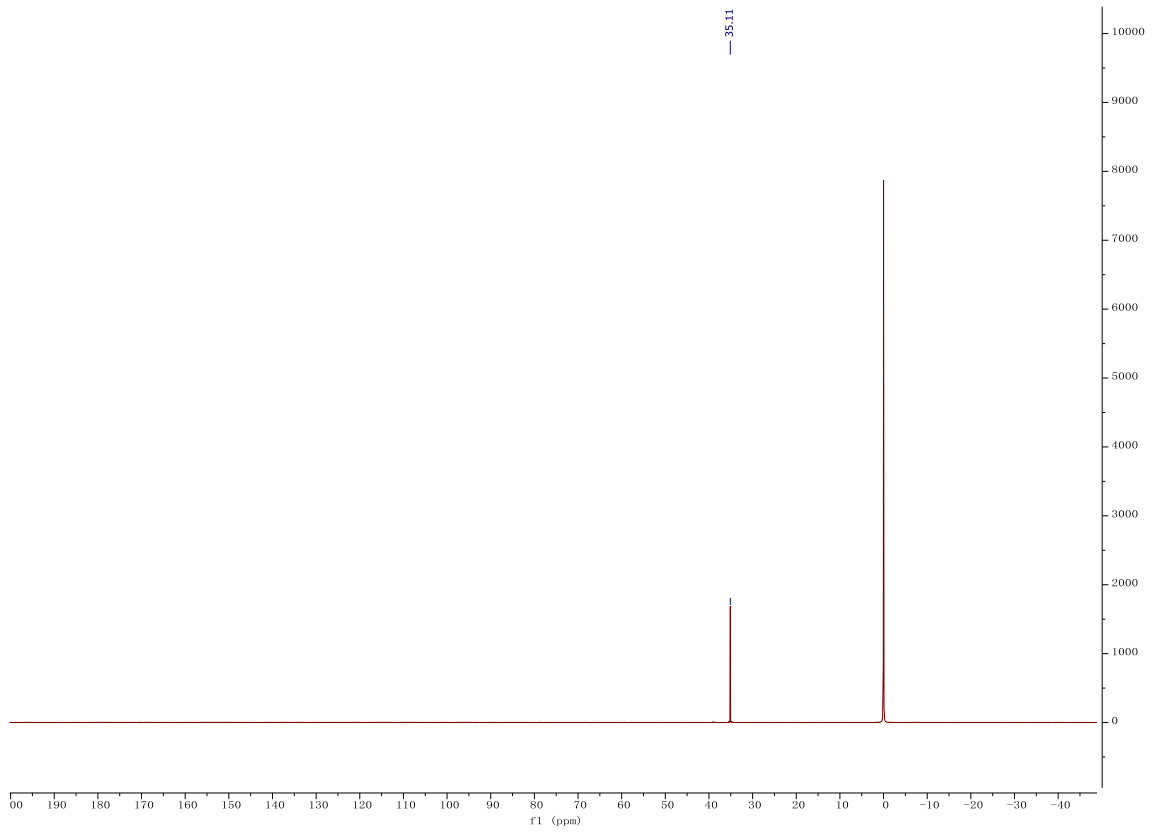

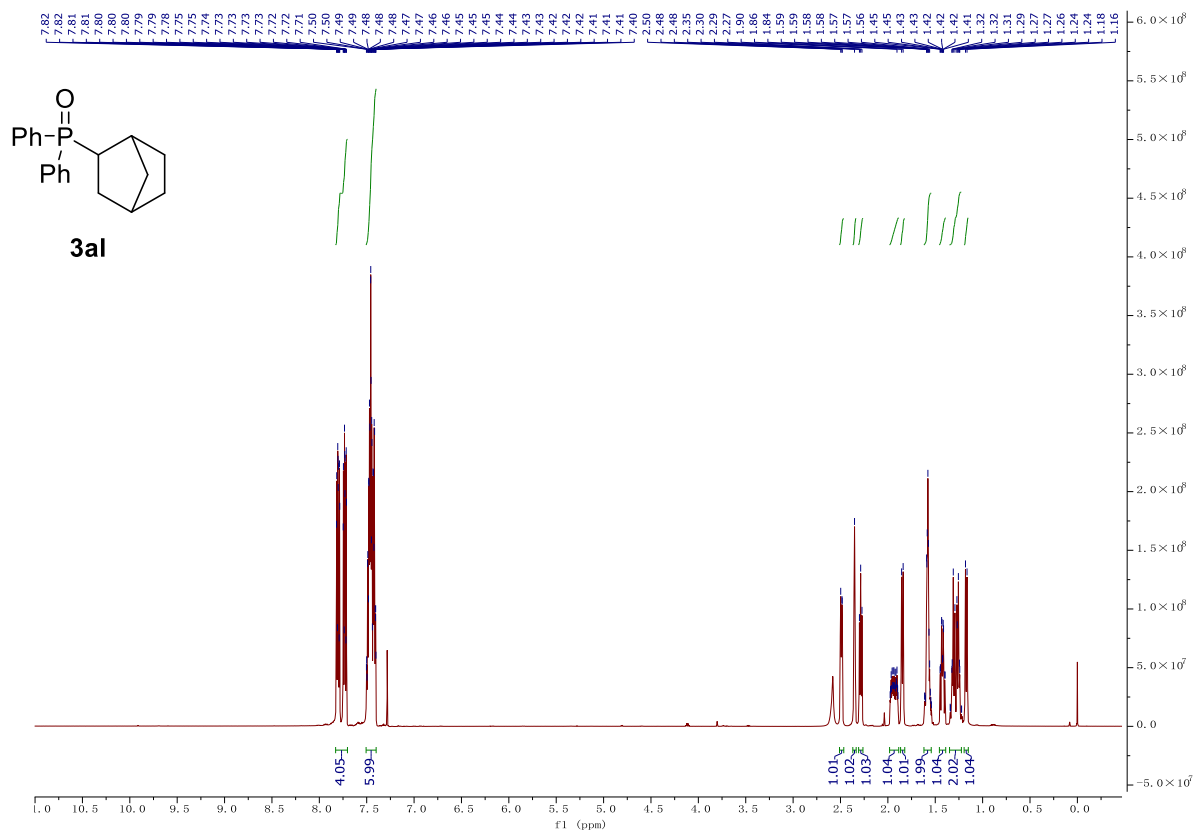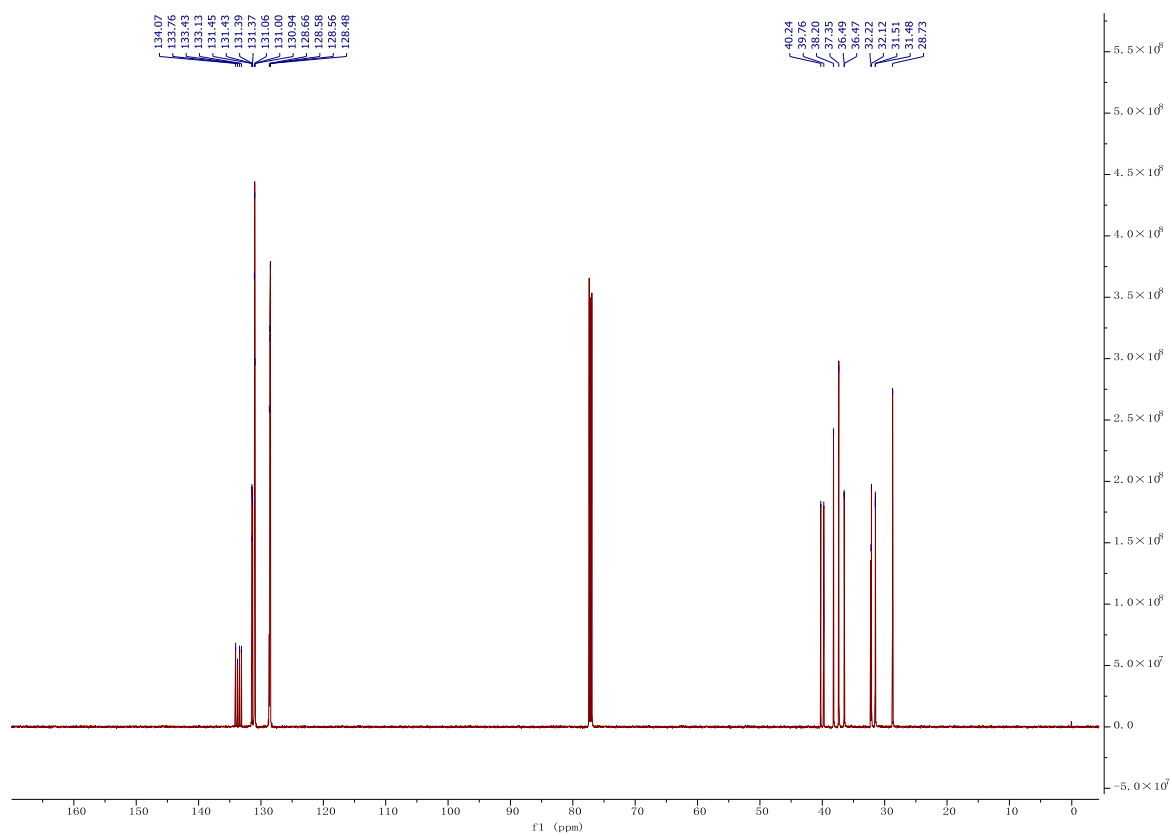

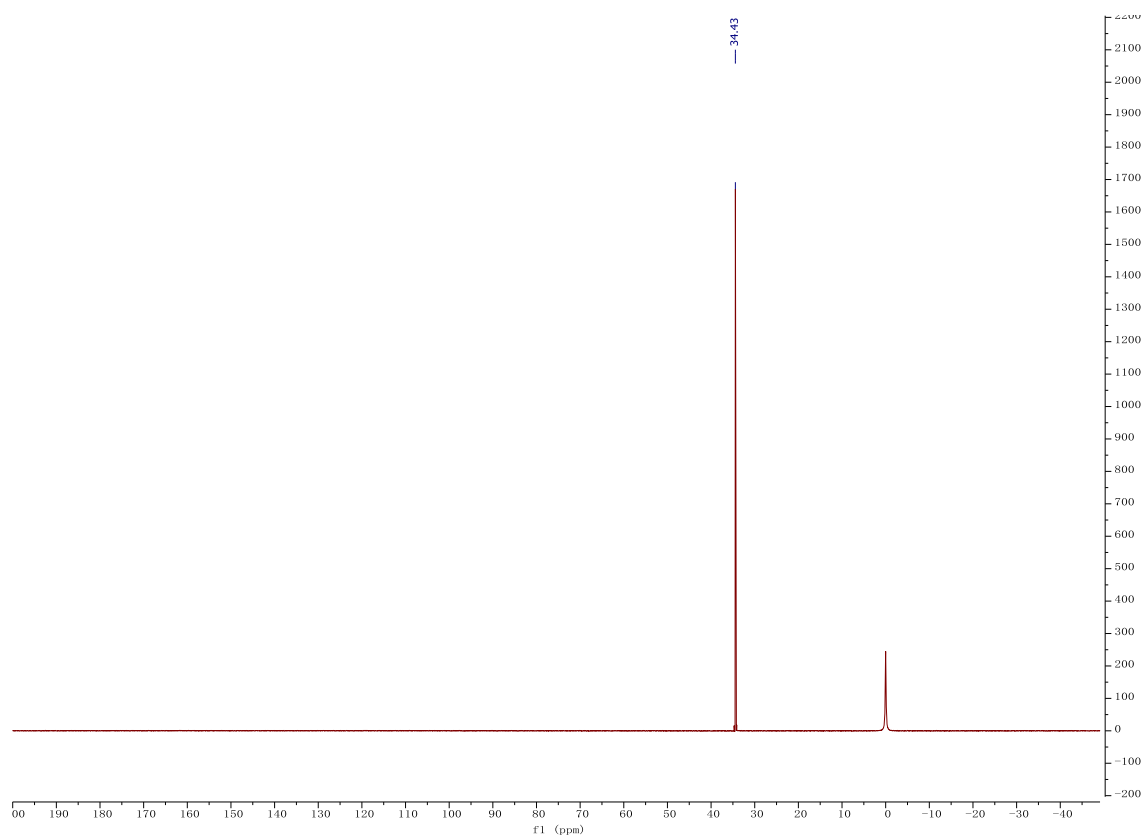



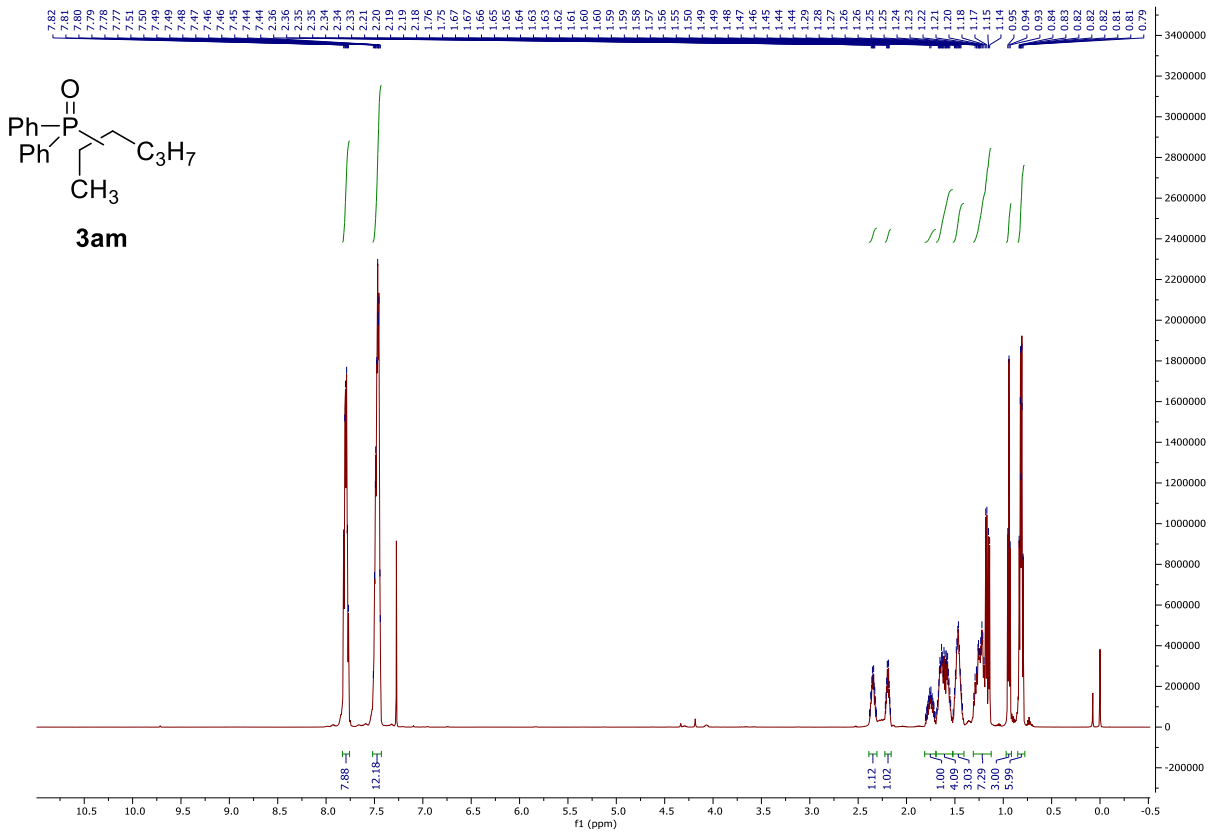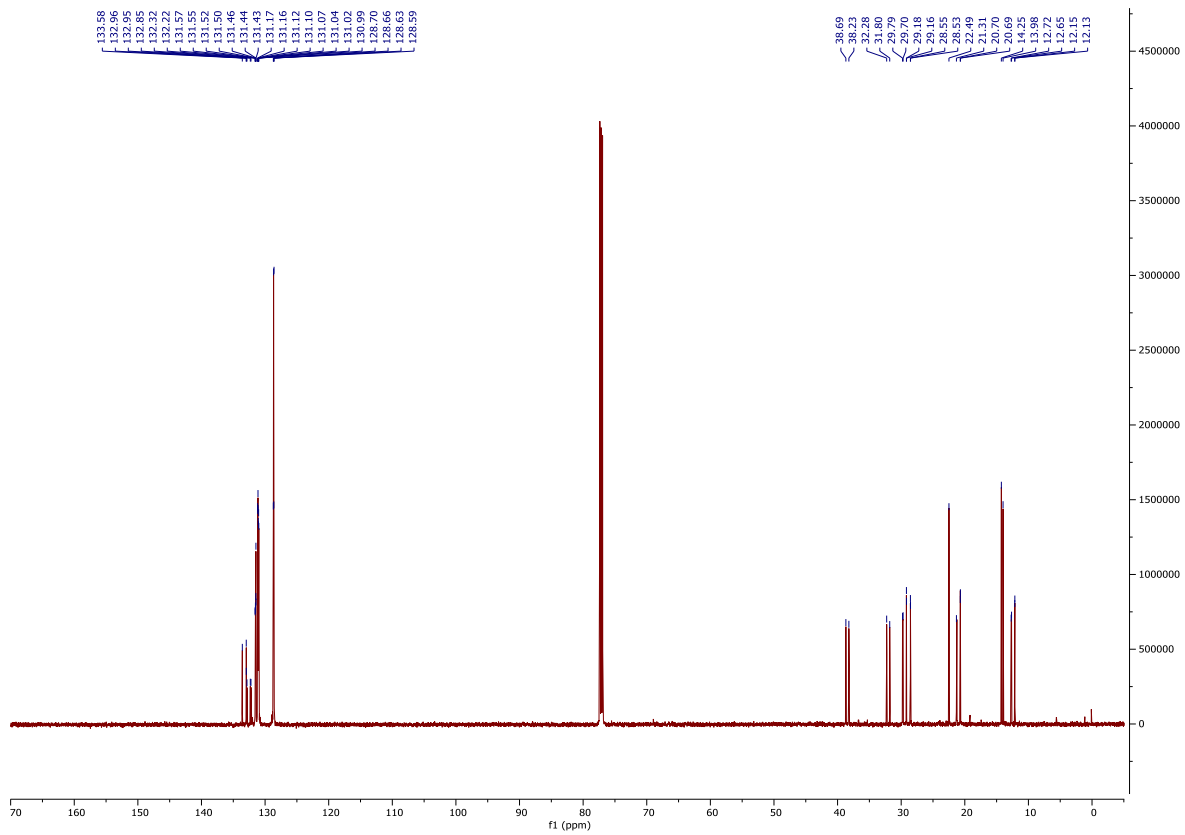

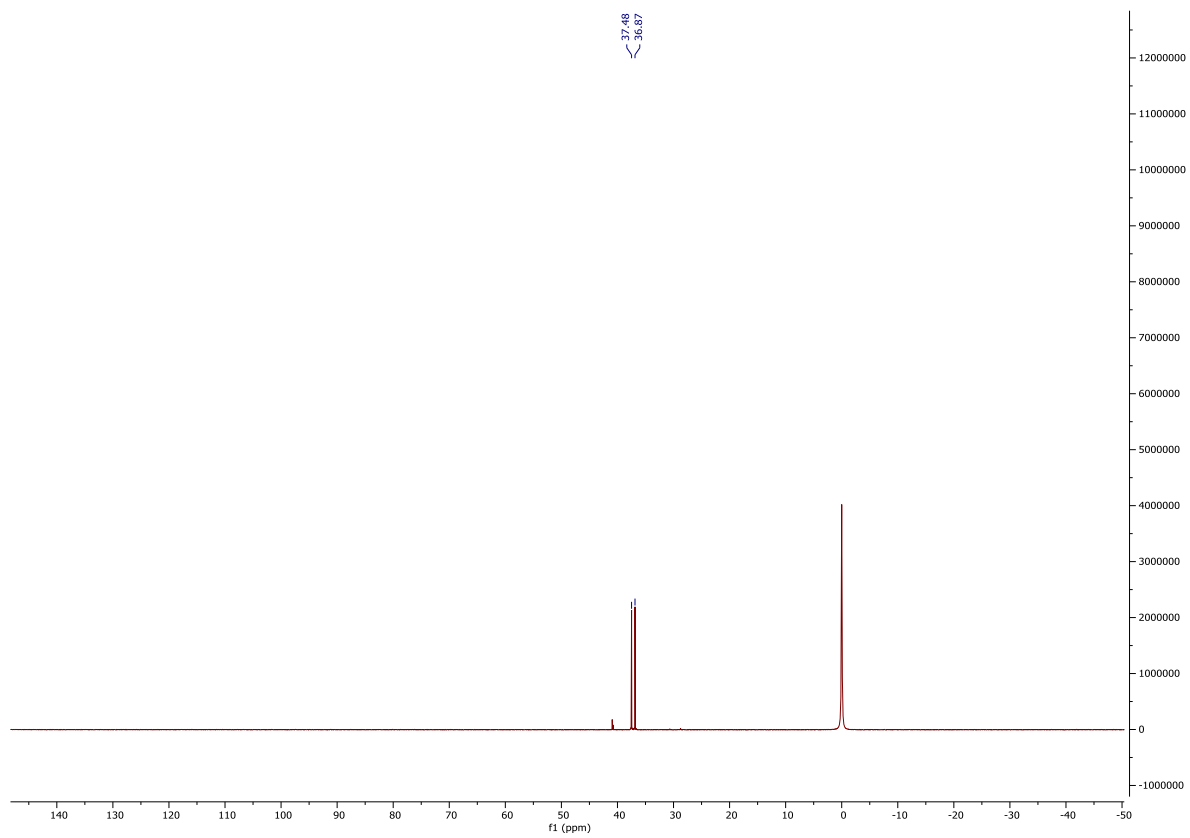

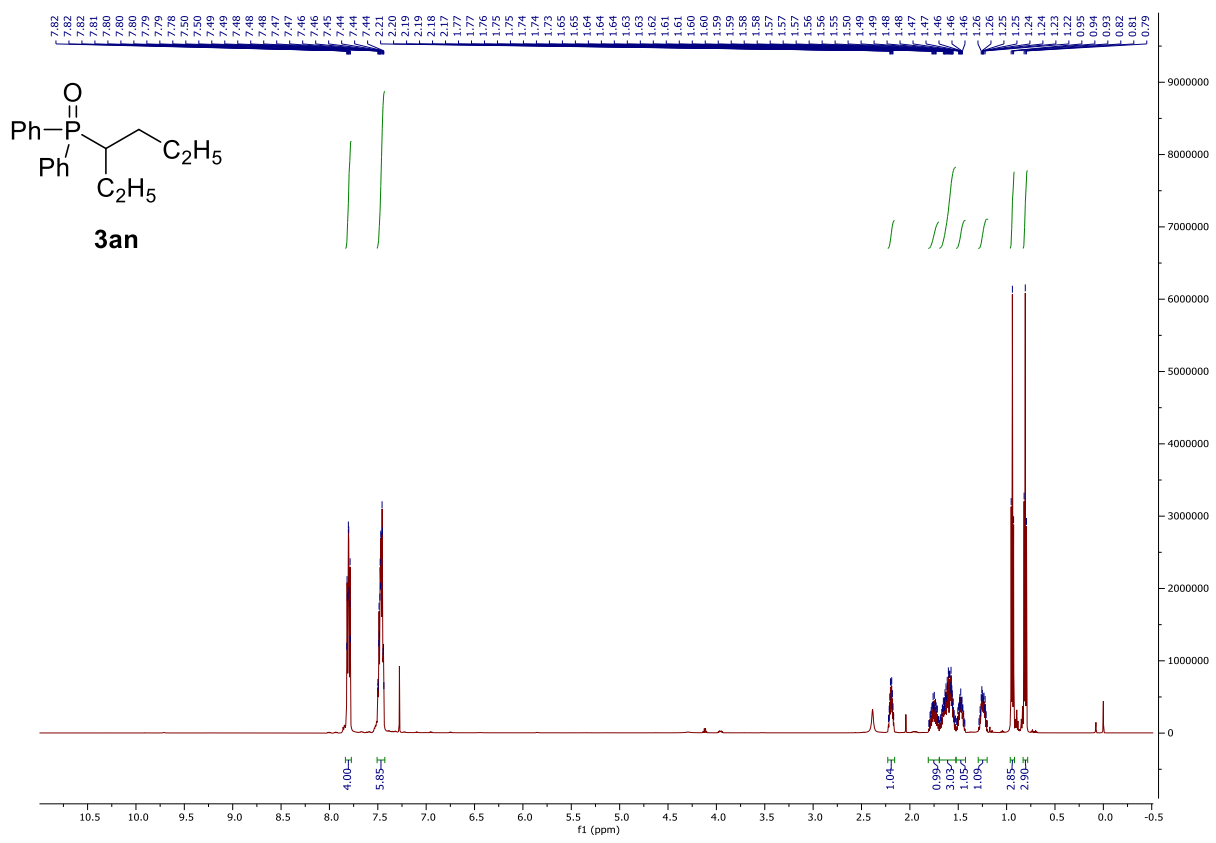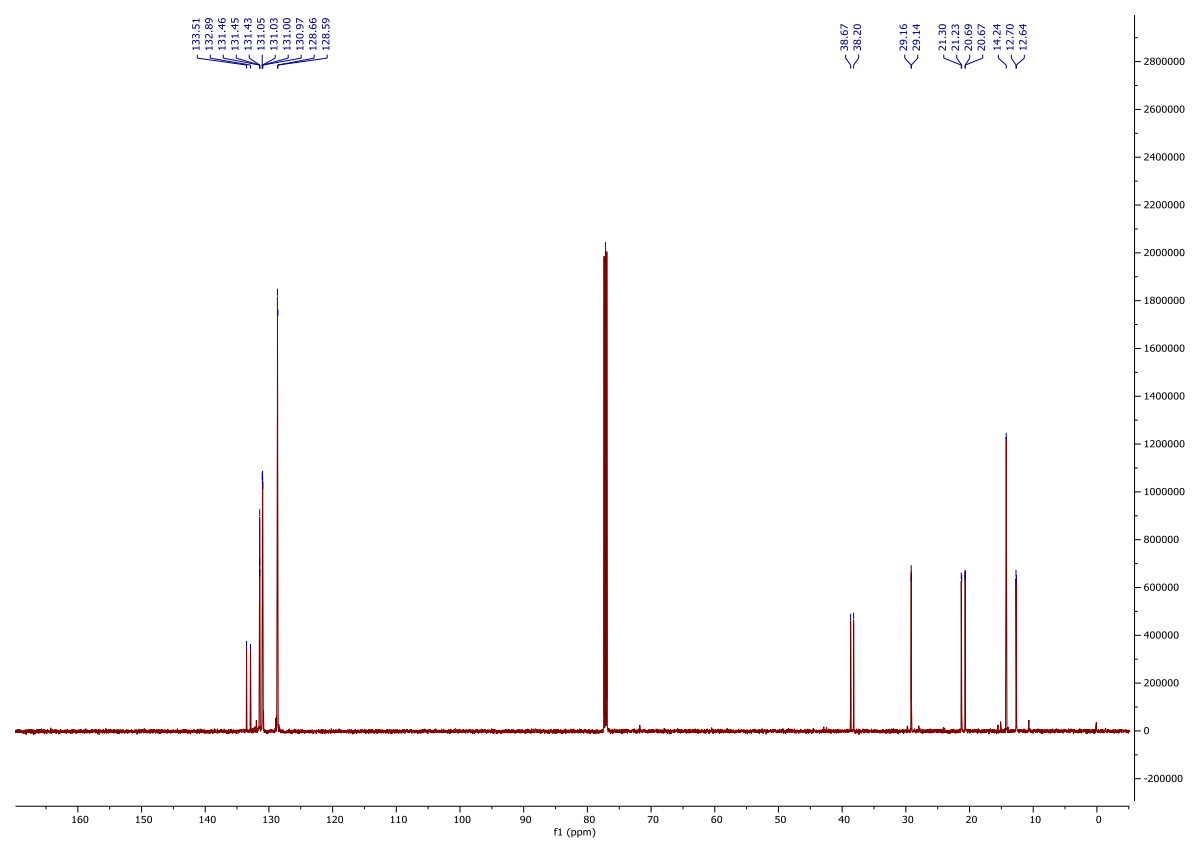

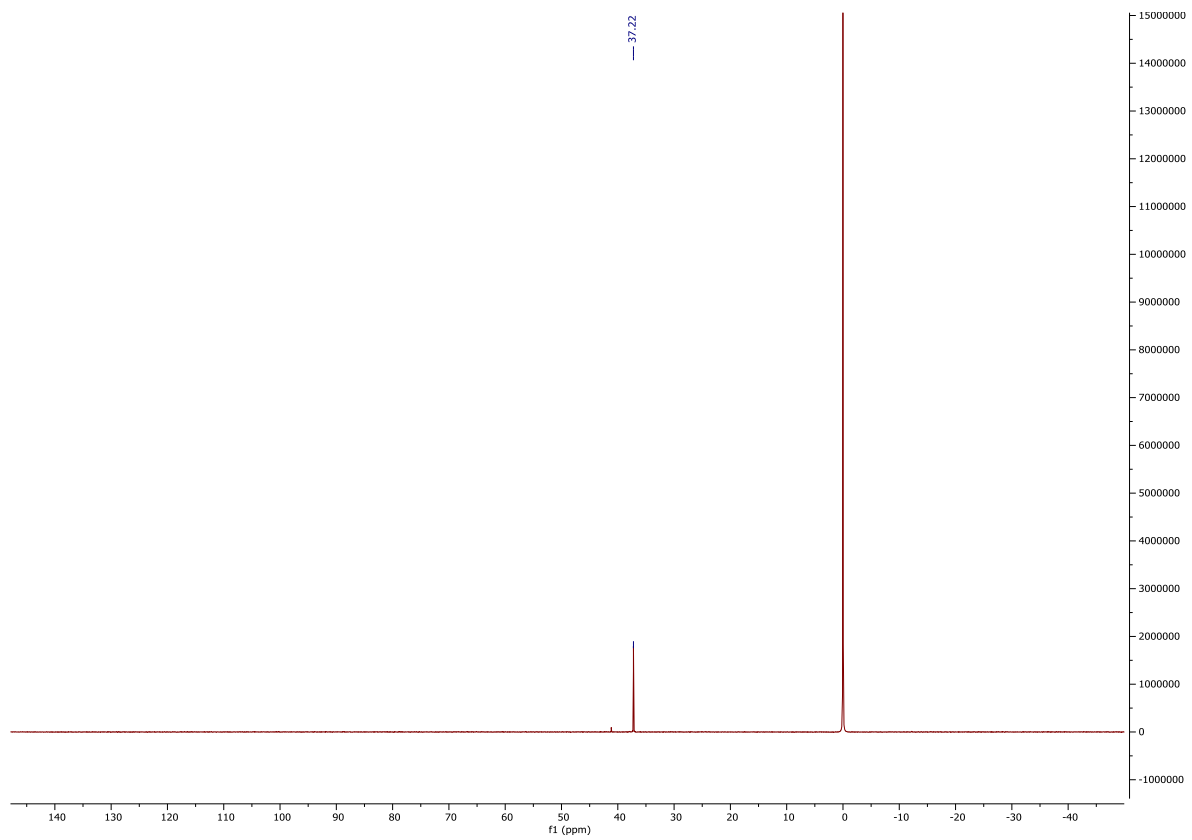



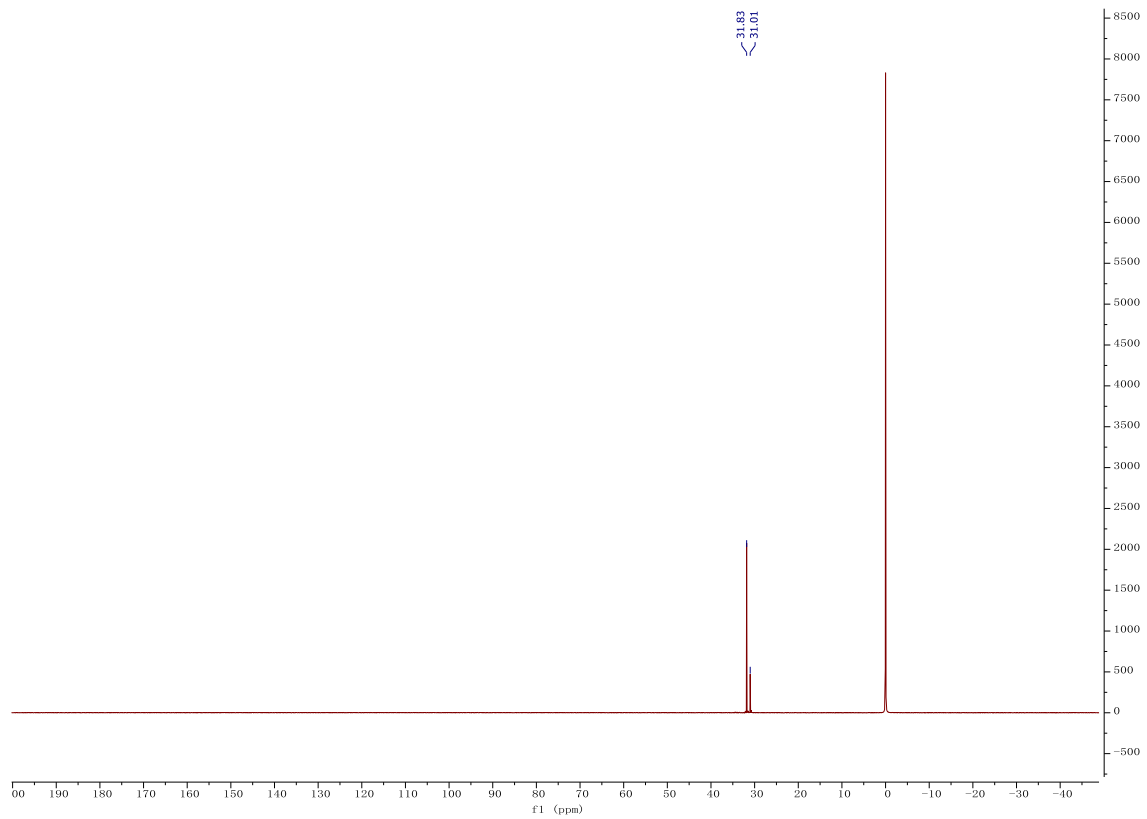

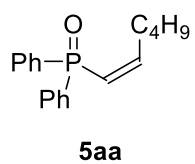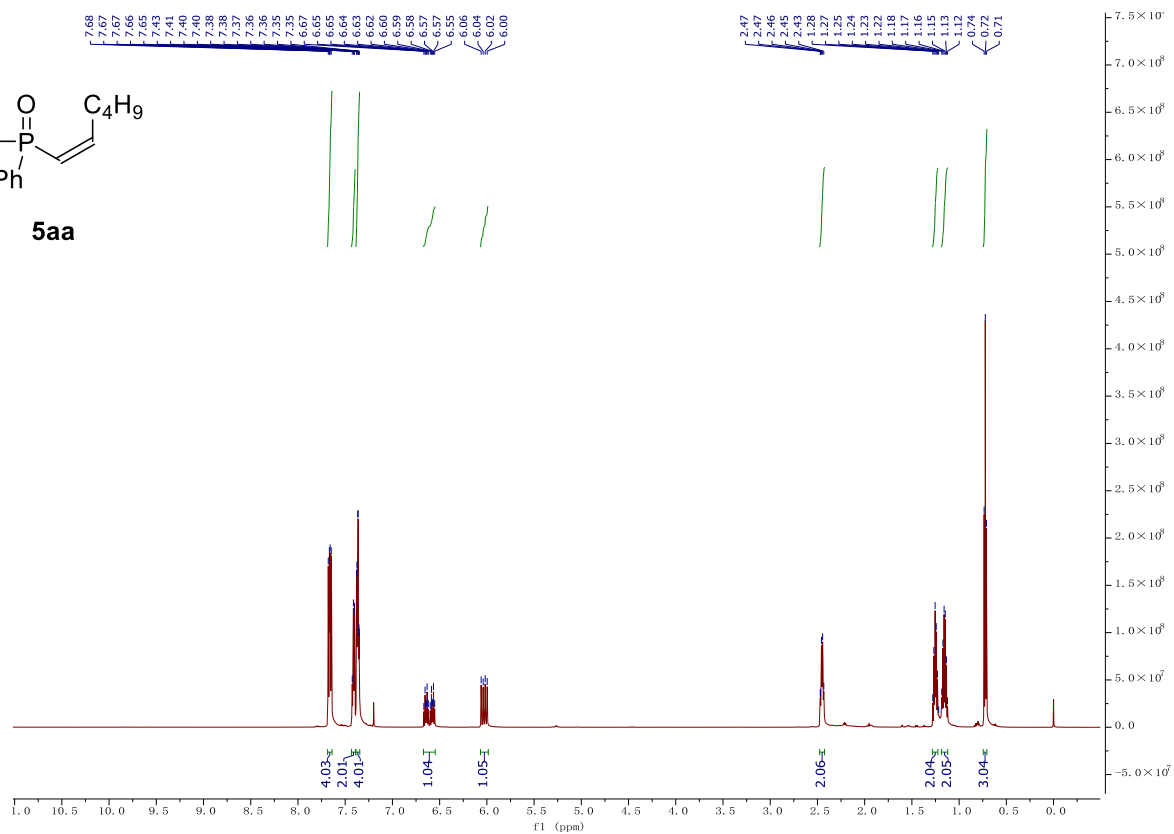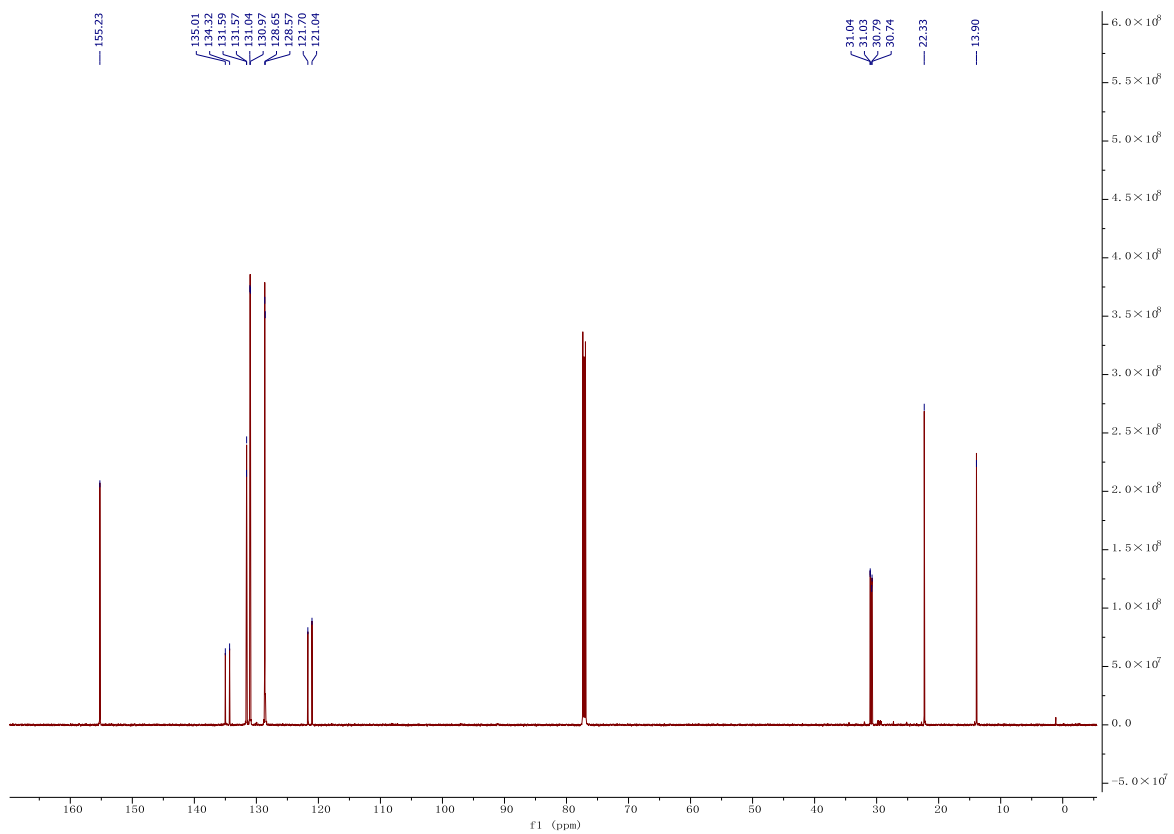

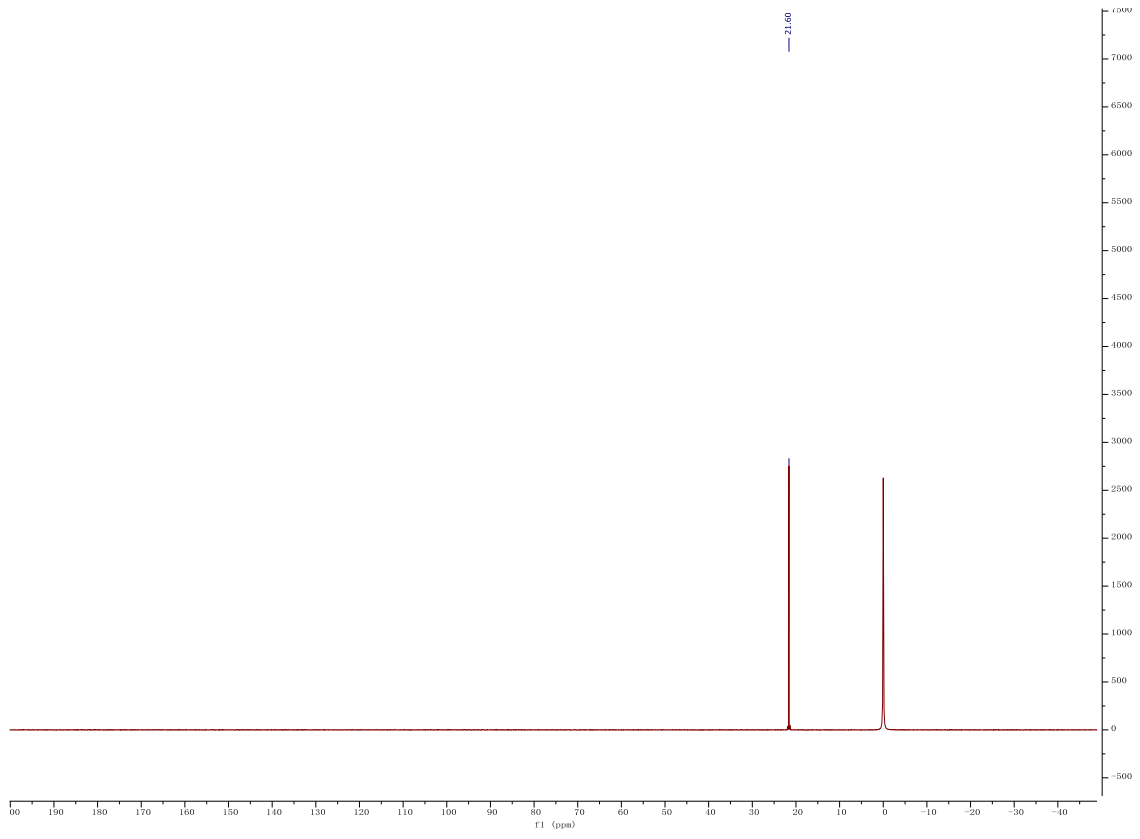





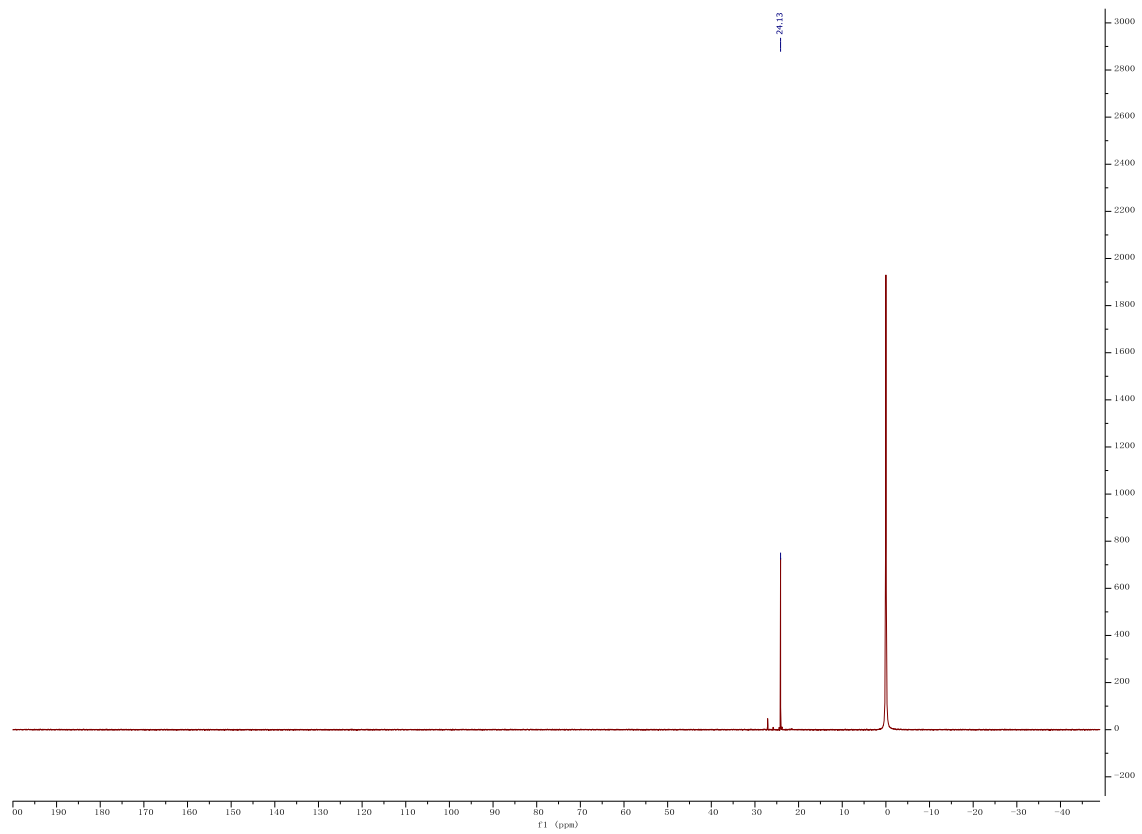



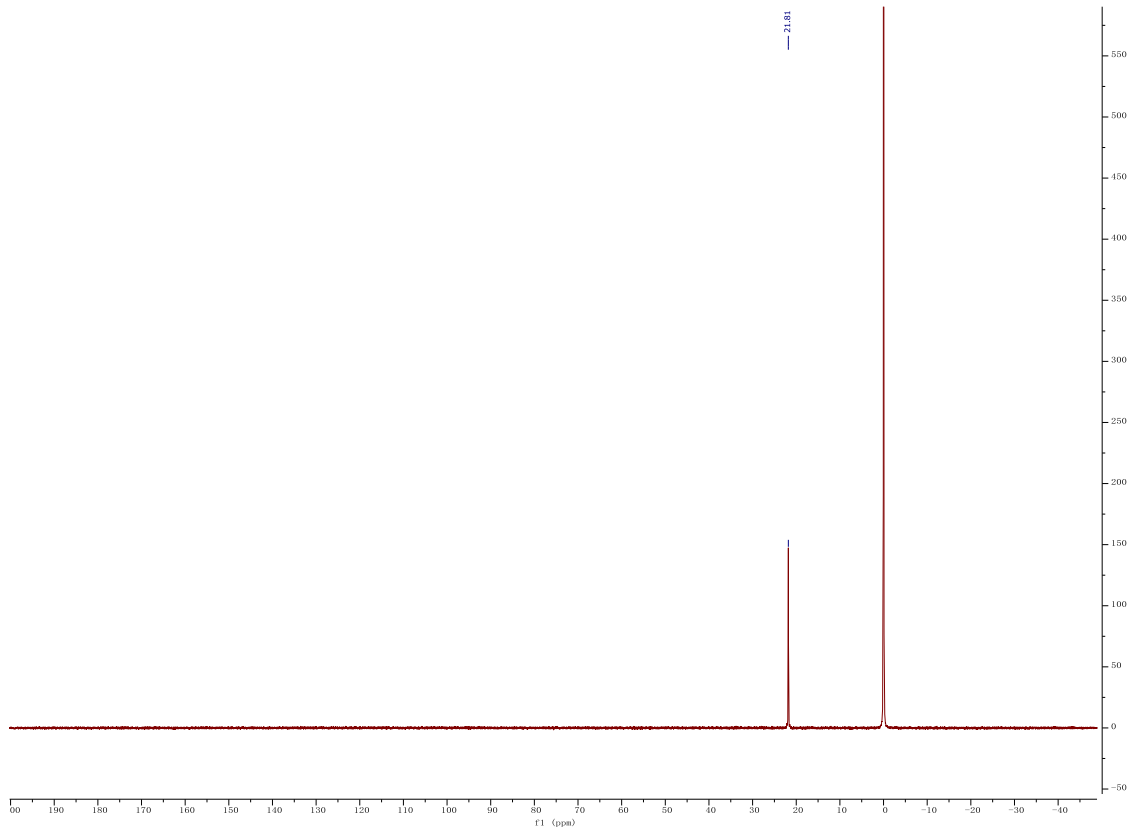

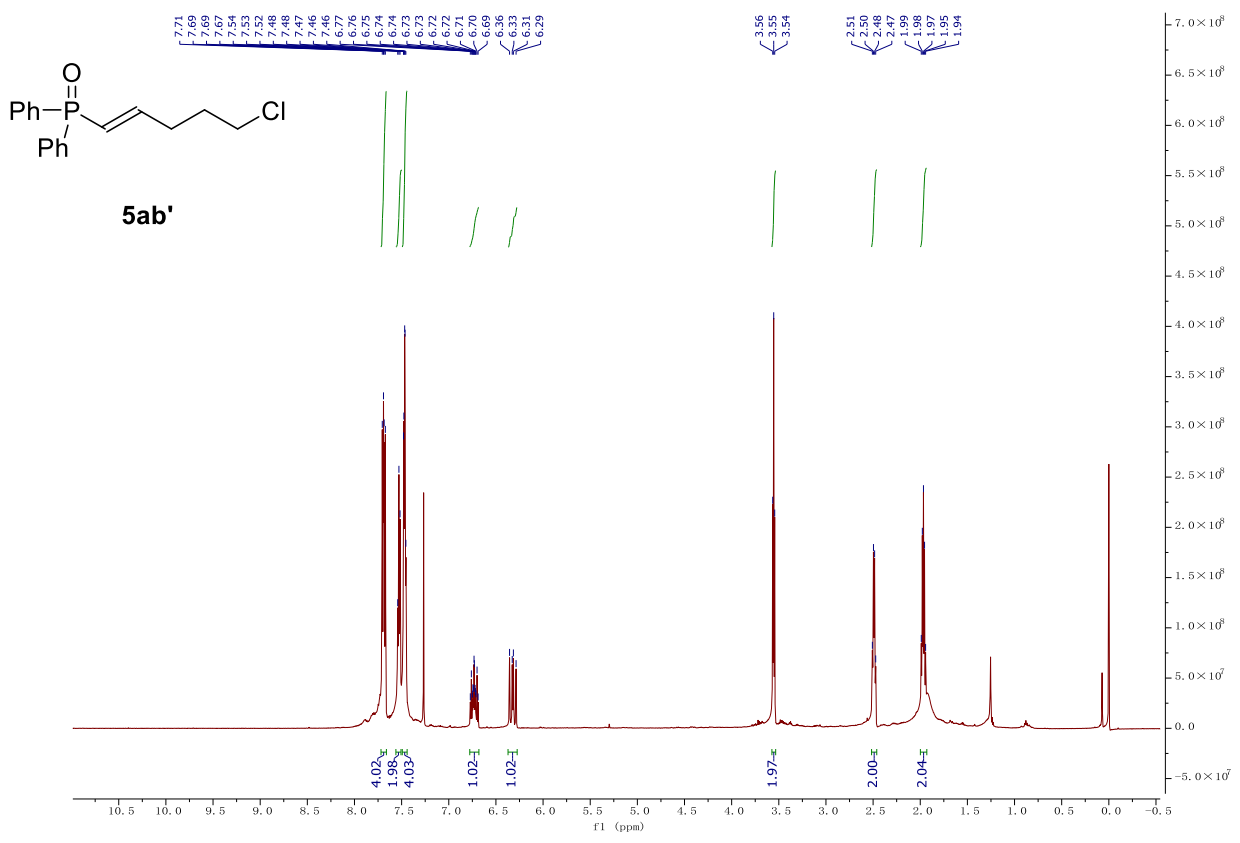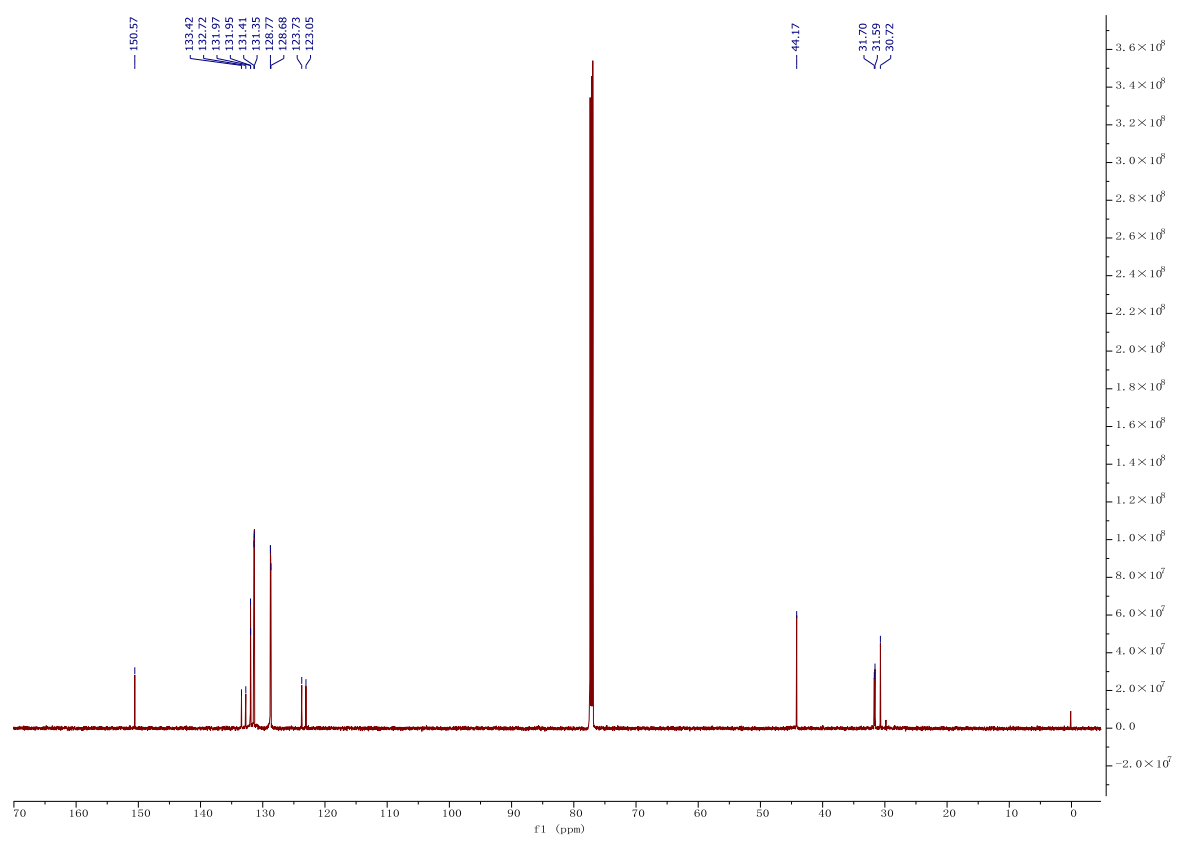

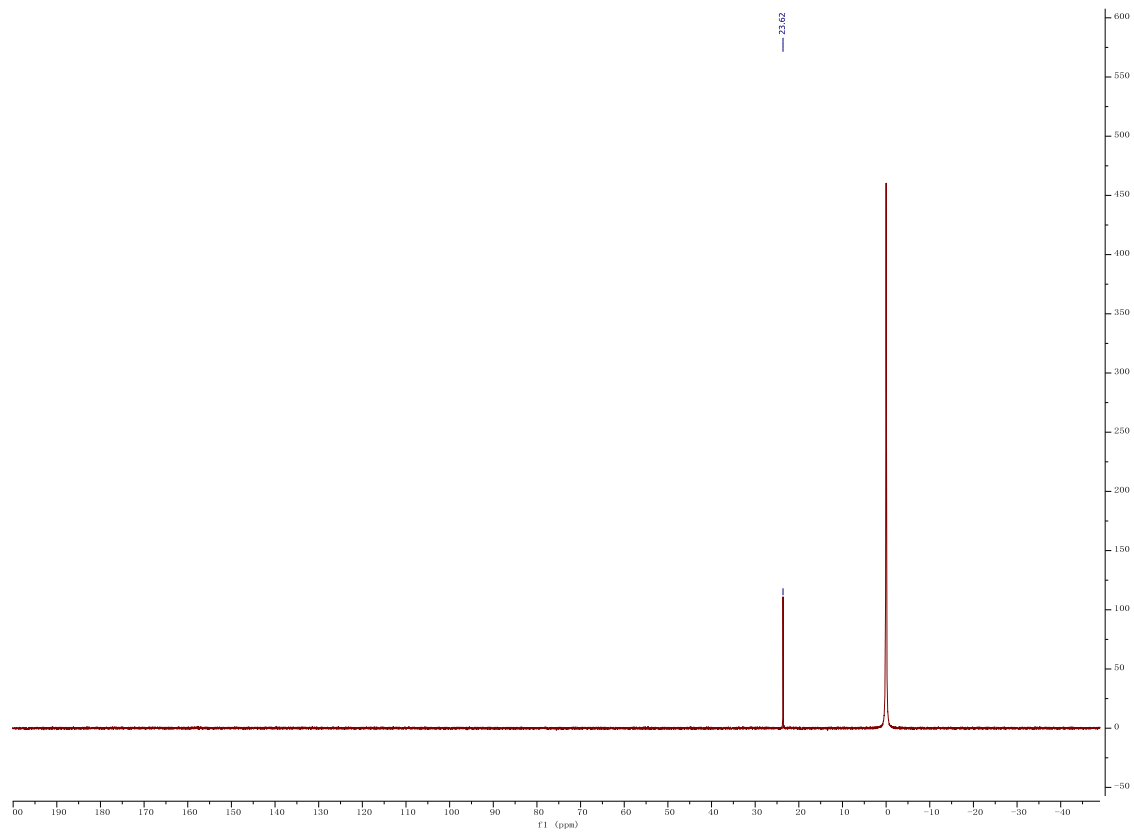

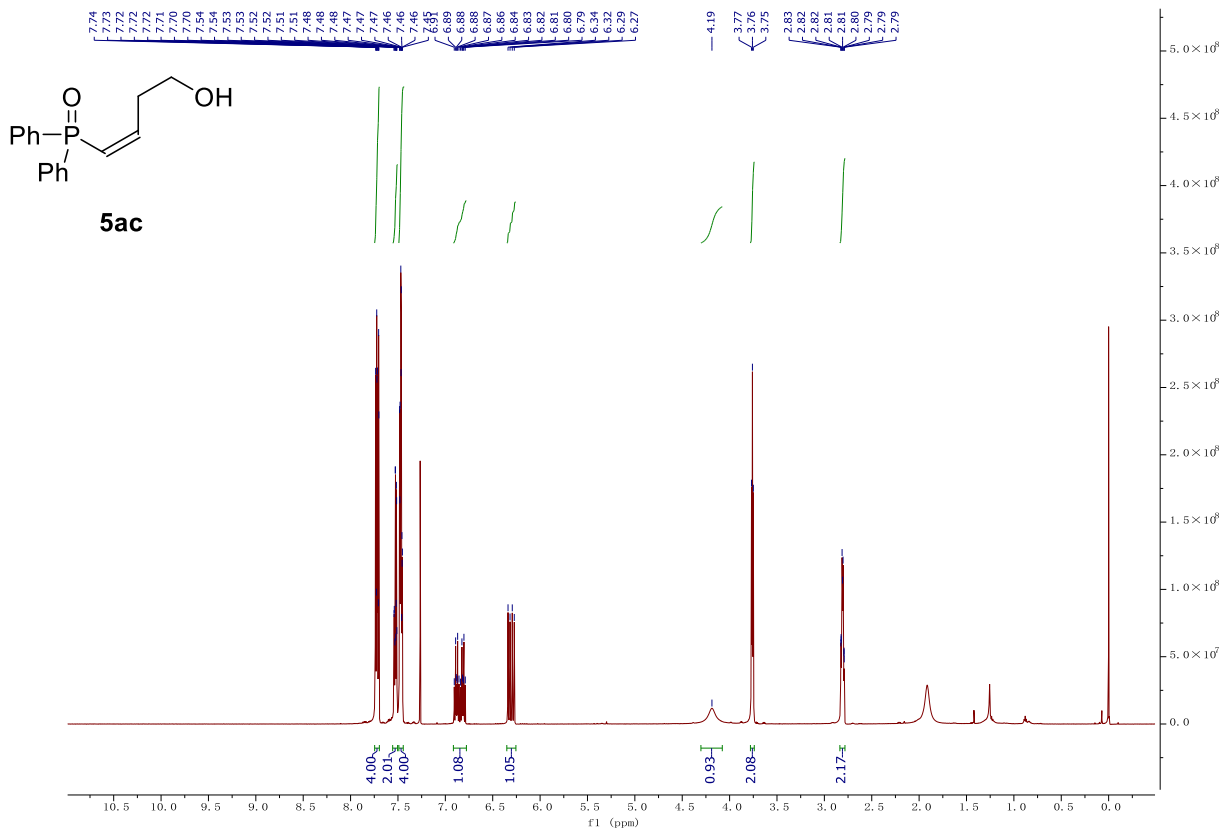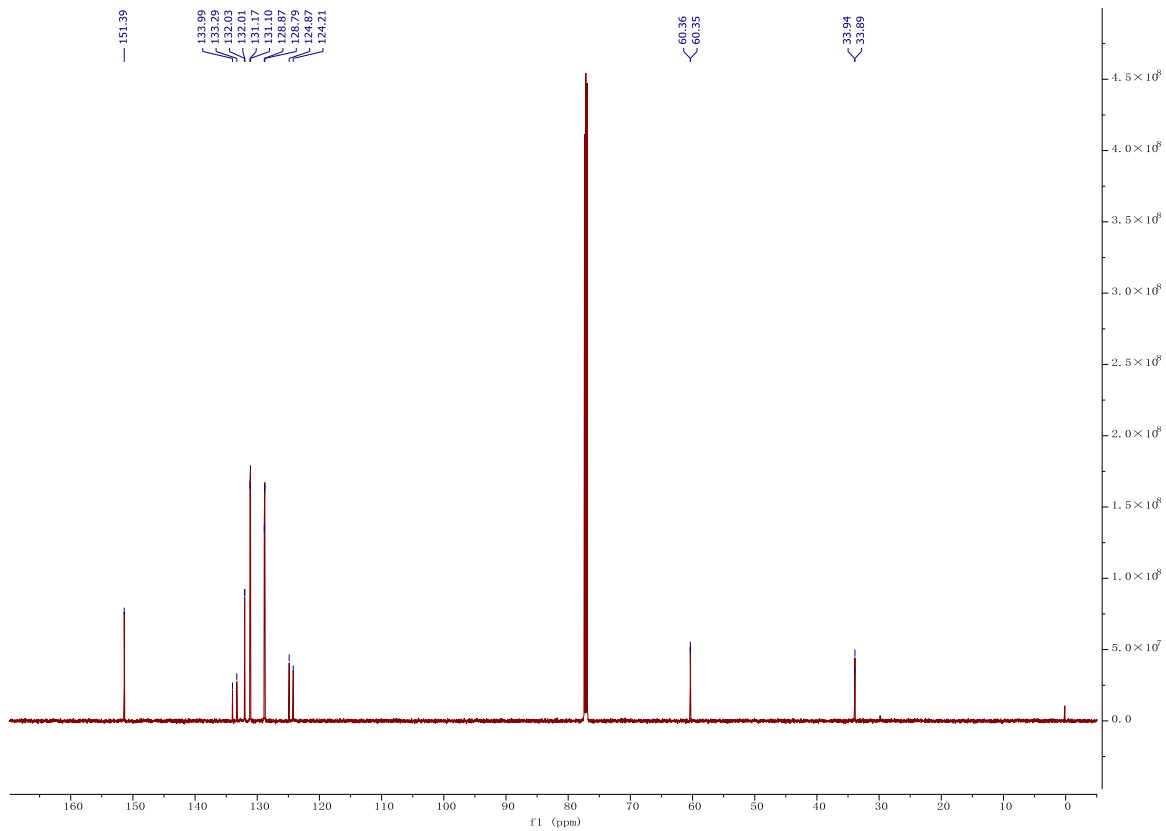

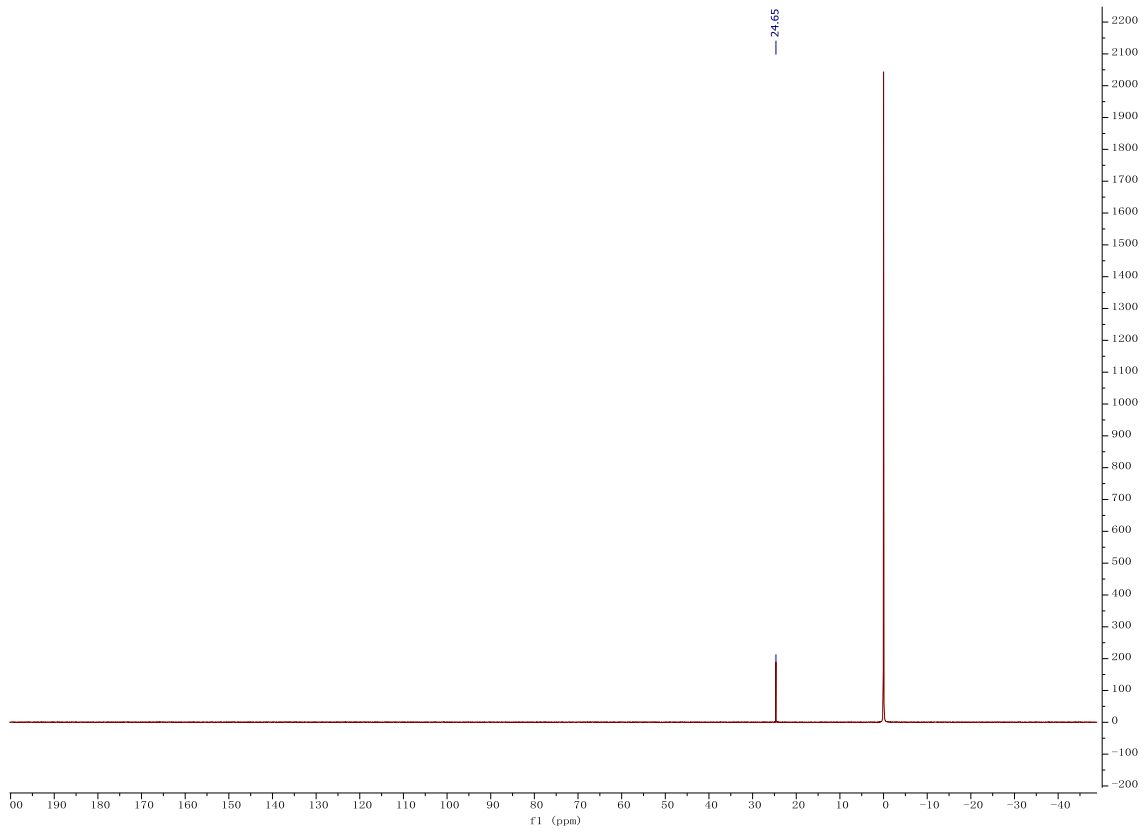



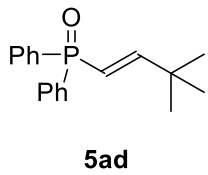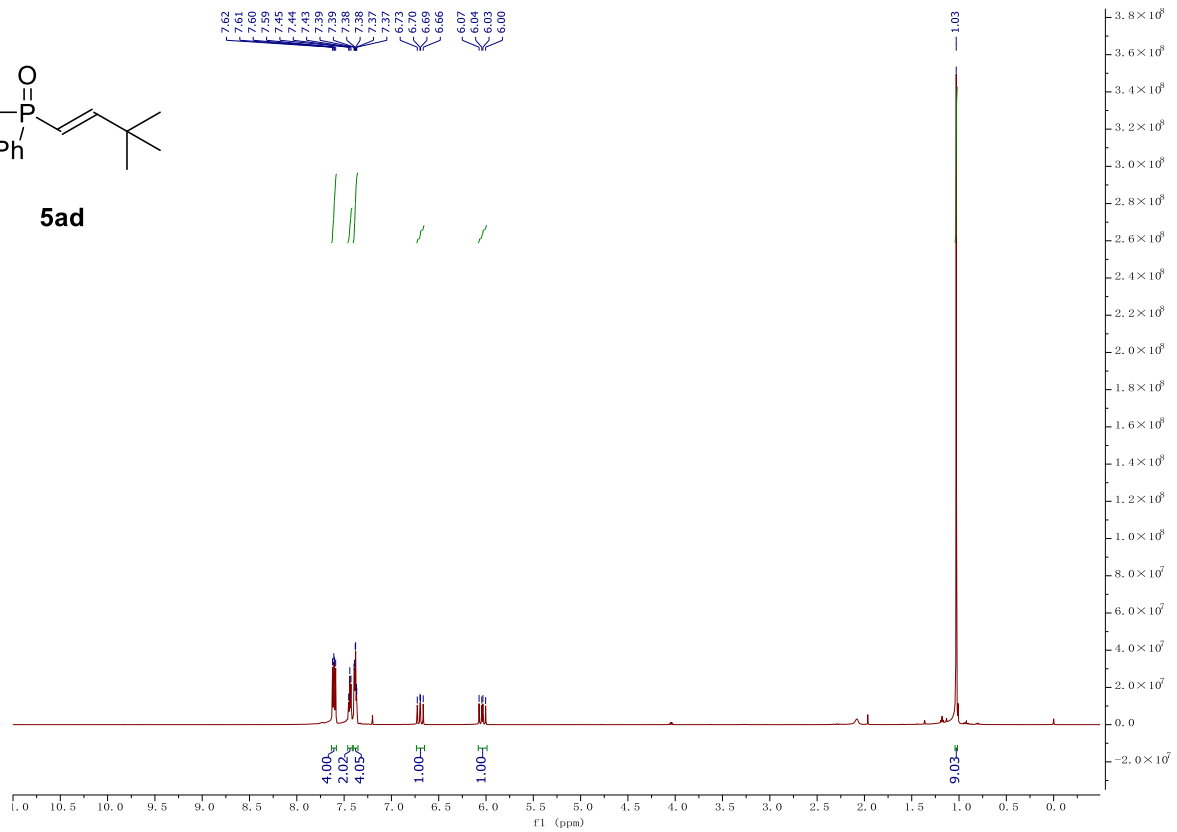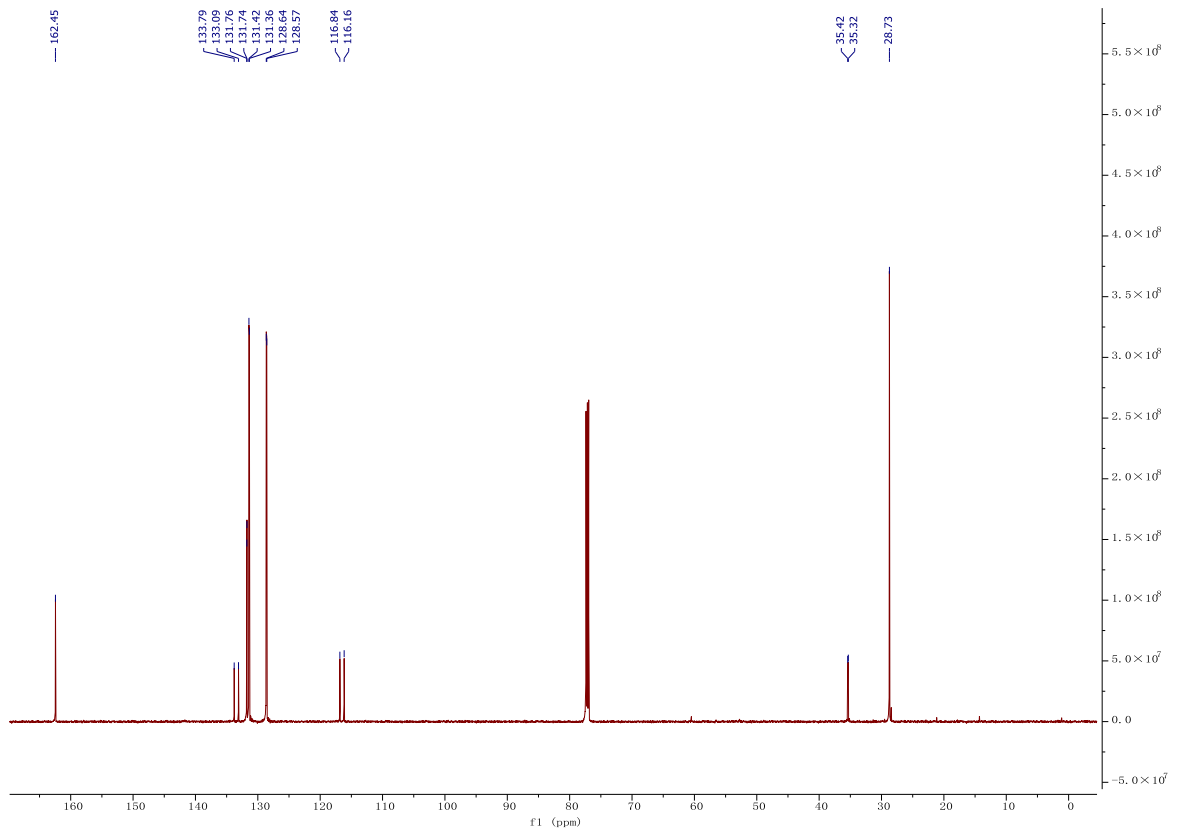

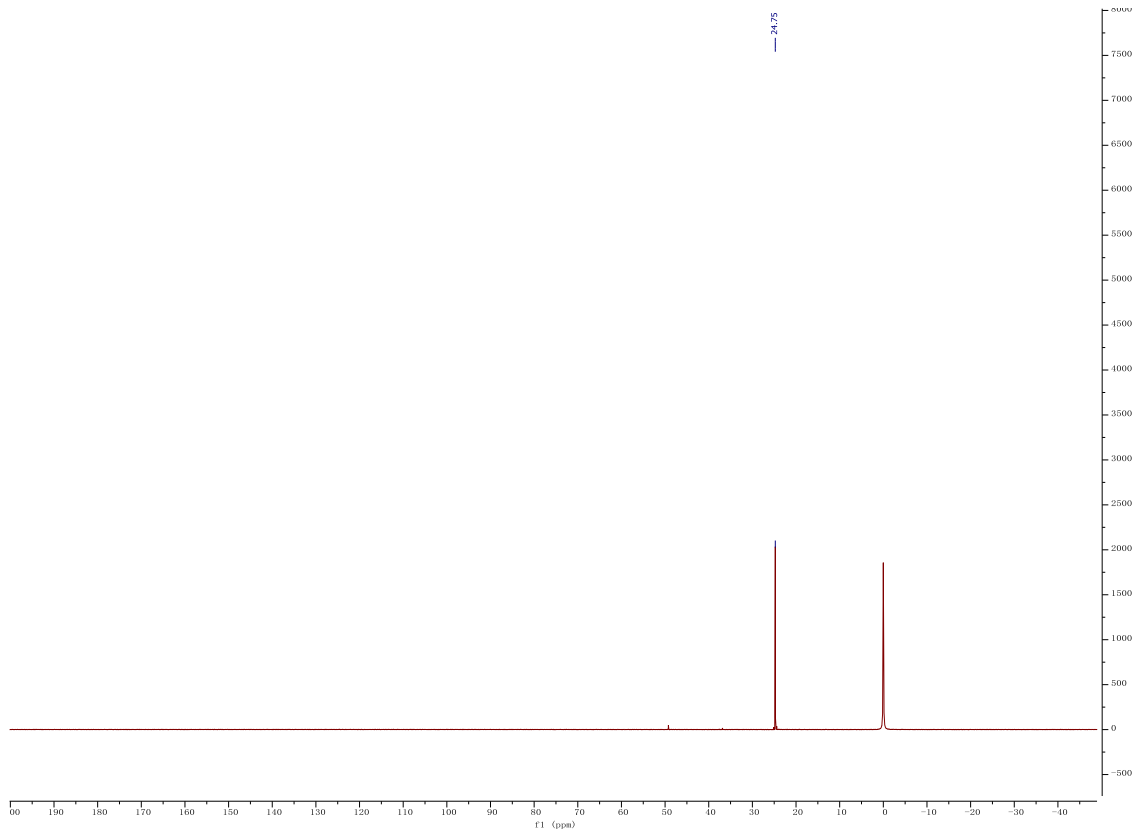

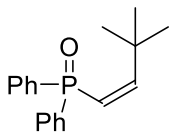

5ad'

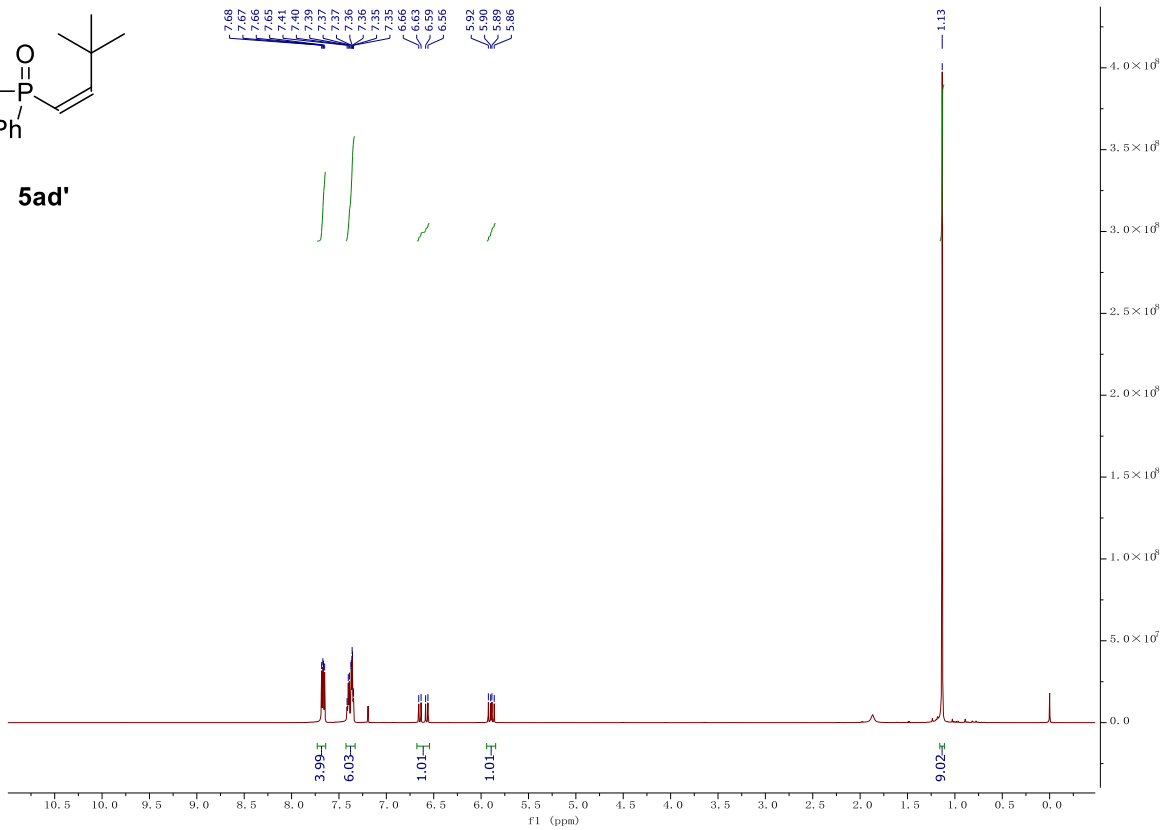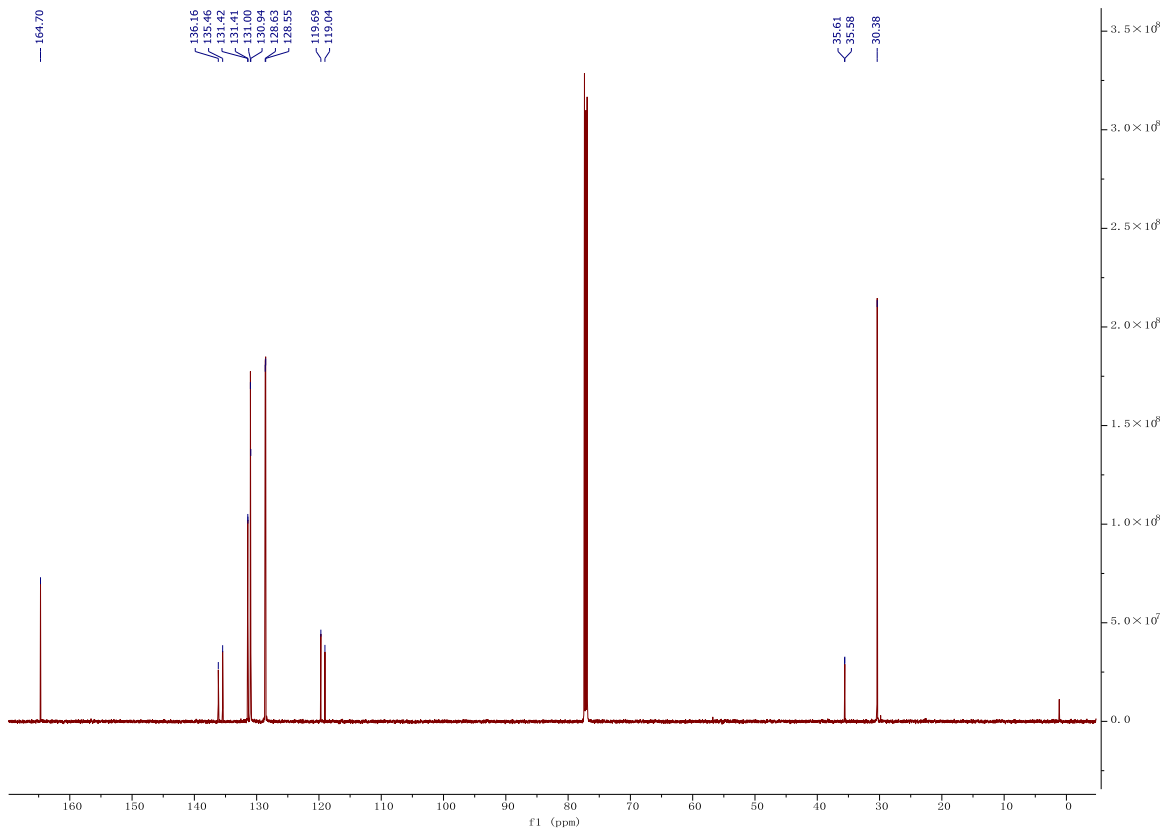

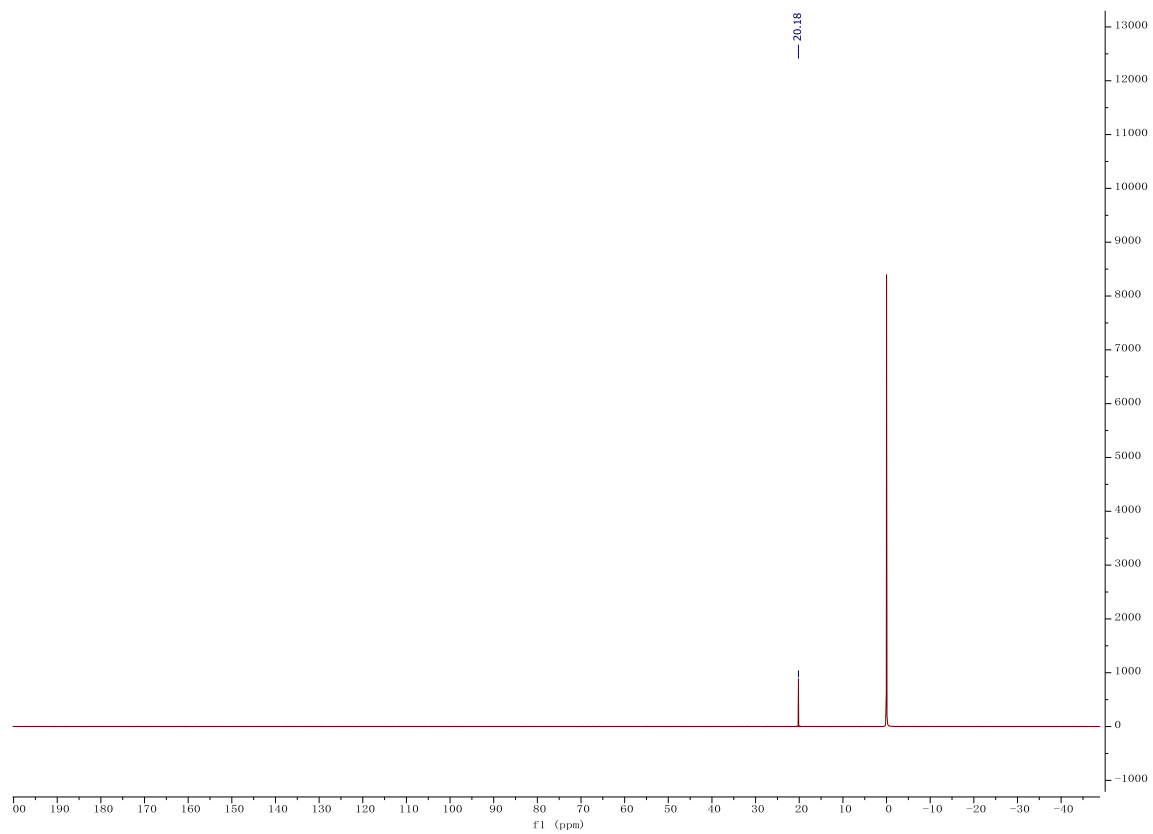

Supplement: d1gc00374g1.pdf [file d1gc00374g1.pdf]
